# Supplementary material for: Chemical and linguistic considerations for encoding Chinese characters: an embodiment using chain-end degradable sequence-defined oligourethanes created by consecutive solid phase click chemistry
Source: Royal Society of Chemistry journal article supplement (doi:10.1039/d3sc06189b), 2024-01-01
Supplement: d3sc06189b1.pdf [file d3sc06189b1.pdf]

# Chemical and Linguistic Considerations for Encoding Chinese Characters: An Embodiment Using Chain-End Degradable Sequence-Defined Oligourethanes Created by Consecutive Solid Phase Click Chemistry

Le Zhang,<sup>a</sup> Todd B. Krause,<sup>c</sup> Harnimarta Deol,<sup>a</sup> Bipin Pandey,<sup>a</sup> Qifan Xiao,<sup>a</sup> Hyun Meen Park,<sup>a</sup> Brent L. Iverson,<sup>a,\*</sup> Danny Law,<sup>b,c,\*</sup> and Eric V. Anslyn<sup>a,\*</sup>

<sup>a</sup> Department of Chemistry, The University of Texas at Austin, TX 78712, United States

<sup>b</sup> Department of Linguistics, The University of Texas at Austin, TX 78712, United States

<sup>c</sup> Linguistics Research Center, The University of Texas at Austin, TX 78712, United States

Emails: iversonb@austin.utexas.edu, dannylaw@austin.utexas.edu, anslyn@austin.utexas.edu

## TABLE OF CONTENTS

|                                                 |           |
|-------------------------------------------------|-----------|
| <b>I. General procedure and equipment</b> ..... | <b>1</b>  |
| <b>II. Synthesis and characterization</b> ..... | <b>2</b>  |
| <b>III. Sequencing experiments</b> .....        | <b>8</b>  |
| <b>IV. User manual for Python scripts</b> ..... | <b>77</b> |

### I. General procedure and equipment

All materials used in the synthesis of each compound and related tests, were purchased from Sigma-Aldrich Chemical Co., Acros Organics, Tokyo Chemical Industry, Chem Impex International, etc. and used without further purification. Solvents (DCM, NMP, chloroform, DMSO, DMF, MeOH, MeCN, Isopropanol) were of reagent grade or HPLC grade quality and purchased from Fischer Scientific. NMR solvents (CDCl<sub>3</sub>-*d*, MeOD-*d*<sub>4</sub>) were purchased from Cambridge Isotope Laboratories.

**Column chromatography** was performed using silica gel 60 (230 ± 400 mesh, 0.040 ± 0.063 mm) from Dynamic Adsorbents.

**TLC** analyses were carried out using Silica TLC Plates Glass Backing 20 by 20 cm sheet UV active at 254 nm.

**Reverse phase column chromatography** and **HPLC** purifications were performed on Shimadzu Prominence HPLC system equipped with Zorbax SB-C18 preparatory column (21.2 x 250 mm) with 7.0 μm packing material. Analytical HPLC traces were also carried out using a Zorbax SB-C18 analytical column (4.6 x 250 mm) with 5.0 μm packing material. 5-95% gradient elution (MeCN/H<sub>2</sub>O with 0.1% formic acid). Hydrophobic urethanes utilized 30-95% gradient elution (MeCN/H<sub>2</sub>O with 0.1% formic acid).

**<sup>1</sup>H** and **<sup>13</sup>C** spectra were recorded on Bruker AVIII with a BBFO Prodigy liquid nitrogen CryoProbe 600 MHz NMR spectrometers. The NMR spectra were referenced to solvent and the spectroscopic solvents were purchased from Cambridge Isotope Laboratories.

**Liquid Chromatography/Mass spectra** were recorded on an Agilent Technologies 6120 Single Quadrupole or 6125B Single Quadrupole mass spectrometer interfaced with an Agilent 1200 series liquid chromatography system equipped with a diode-array detector. Column: Agilent ZORBAX Eclipse Plus S2 C18 narrow bore column; 2.1 mm internal diameter; 50 mm length; 5 micron particle size; P.N. 959746-902. Resulting spectra were analysed using Agilent LC/MSD ChemStation. Separations were achieved

with a gradient elution from 5 to 95% organic, using MeCN and Water w/ 50 mM ammonium acetate as the eluents. **High resolution mass spectrometry** was performed by the UT-Austin Mass Spectrometry Facility using an Agilent Technologies 6530 Accurate-Mass Q-TOF (G6530A) with an Agilent Technologies Jet Stream ESI source, interfaced with an Agilent Technologies 1260 Infinity liquid chromatography system (G1312B). An Agilent Technologies 6546 Accurate-Mass Q-TOF (G6546A) with an Agilent Technologies Dual Jet Stream ESI source, interfaced with an Agilent Technologies 1260 Infinity II liquid chromatography system (G7112B), was used.

## II. Synthesis and characterization

### II(a). Synthesis and characterization of the monomer

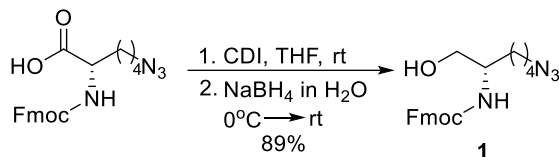

To a stirred solution of Fmoc-L-azidolysine (1.972 g, 5 mmol) in anhydrous THF (19 mL) was added N,N-carbonyldiimidazole (1.08 g, 6.7 mmol) at room temperature. The reaction stirred for at least 10 minutes and was then cooled to 0 °C. Next, a solution of NaBH<sub>4</sub> (311.7 mg, 8.24 mmol) in H<sub>2</sub>O (8.32 mL) was added. The solution was stirred for at least 30 minutes, up to 1.5 hours. The reaction was quenched by addition of 1M HCl and extracted with EtOAc (3 x 65 mL). The combined organics were washed 1x with brine, dried over Na<sub>2</sub>SO<sub>4</sub>, and concentrated under vacuum. The crude product was purified by silica gel chromatography (1:1 Hexanes:EtOAc) to furnish a white solid (1.69 g, 89%). <sup>1</sup>H NMR (600 MHz, MeOD-*d*<sub>4</sub>) δ 7.79 (d, *J* = 12 Hz, 2H), 7.66 (d, *J* = 12 Hz, 2H), 7.38 (t, *J* = 12 Hz, 2H), 7.30 (t, *J* = 12 Hz, 2H), 4.40-4.43 (m, 1H), 4.30-4.34 (m, 1H), 4.21 (t, *J* = 6 Hz, 1H), 3.56-3.59 (m, 1H), 3.43-3.50 (m, 2H), 3.27 (t, *J* = 6 Hz, 2H), 1.55-1.64 (m, 3H), 1.35-1.49 (m, 3H). <sup>13</sup>C NMR (125 MHz, MeOD-*d*<sub>4</sub>) δ 159.13, 145.70, 145.62, 142.93, 129.05, 128.42, 126.52, 126.47, 121.21, 67.82, 65.70, 54.45, 52.65, 49.83, 32.02, 30.03, 24.56. HRMS +ESI: calculated (C<sub>21</sub>H<sub>24</sub>N<sub>4</sub>O<sub>3</sub>Na<sup>+</sup>) 403.1746, found 403.1741. [M<sup>+</sup>Na].

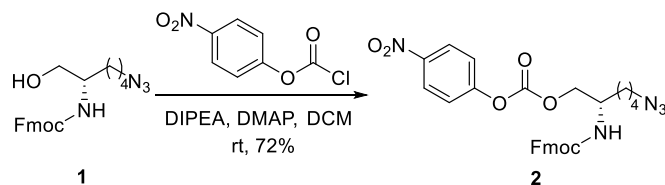

To a stirring solution of **1** (1.69 g, 4.45 mmol) in anhydrous DCM (22 mL) was added pyridine (378 μL, 4.67 mmol) dropwise. Next, 4-nitrophenyl chloroformate (1.08 g, 6.67 mmol) was added, and the reaction left to stir overnight. Reaction was monitored by TLC (2:1 Hexanes:EtOAc) and upon consumption of the starting material, was diluted excessively in DCM and transferred to a separatory funnel. The organic layer was washed with 1M NaHSO<sub>4</sub> (2x), then 1M Na<sub>2</sub>CO<sub>3</sub> (3x), and finally brine. The organic layer was dried over Na<sub>2</sub>SO<sub>4</sub>, filtered, and concentrated in vacuo. The product was purified by silica gel chromatography (2:1 Hexanes:EtOAc) and isolated as a white solid (1.75 g, 3.20 mmol). <sup>1</sup>H NMR (600 MHz, CDCl<sub>3</sub>-*d*) δ 8.25 (d, *J* = 12 Hz, 2H), 7.78 (d, *J* = 6 Hz, 2H), 7.59 (d, *J* = 12 Hz, 2H), 7.41 (t, *J* = 12 Hz, 2H), 7.36 (d, *J* = 12 Hz, 2H), 7.31 (t, *J* = 12 Hz, 2H), 4.82 (d, *J* = 6 Hz, 1H), 4.43-4.50 (m, 2H), 4.31-4.34 (m, 1H), 4.21-4.26 (m, 2H), 3.99-4.05 (m, 1H), 3.30 (t, *J* = 6 Hz, 2H), 1.44-1.67 (m, 6H). <sup>13</sup>C NMR (125 MHz, CDCl<sub>3</sub>-*d*) δ 156.17, 155.50, 152.62, 145.60, 143.92, 143.88, 141.50, 127.93, 127.22, 125.50, 125.11, 125.08, 121.89, 120.20, 70.78, 66.89, 51.26, 50.02, 47.40, 31.05, 28.64, 23.19. HRMS +ESI: calculated (C<sub>28</sub>H<sub>27</sub>N<sub>5</sub>O<sub>7</sub>Na<sup>+</sup>) 568.1808, found 568.1799. [M<sup>+</sup>Na].

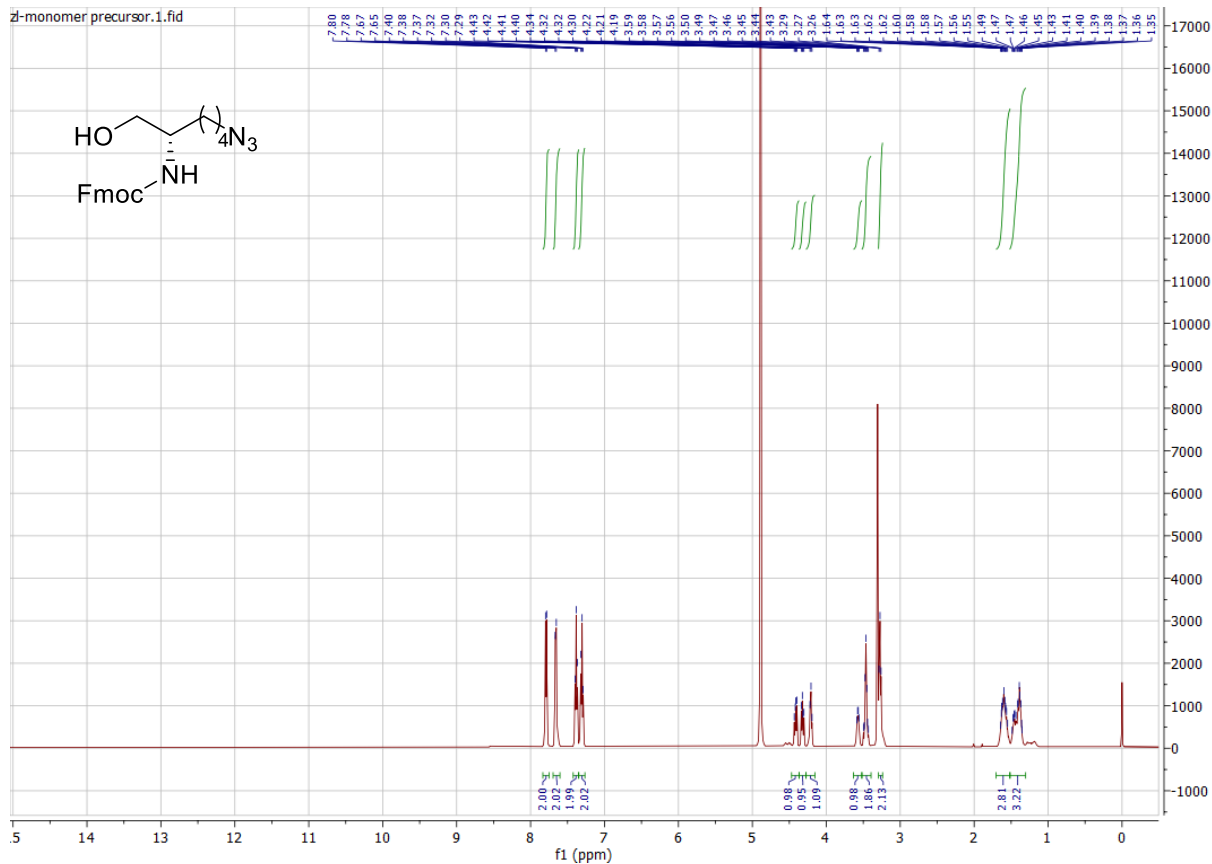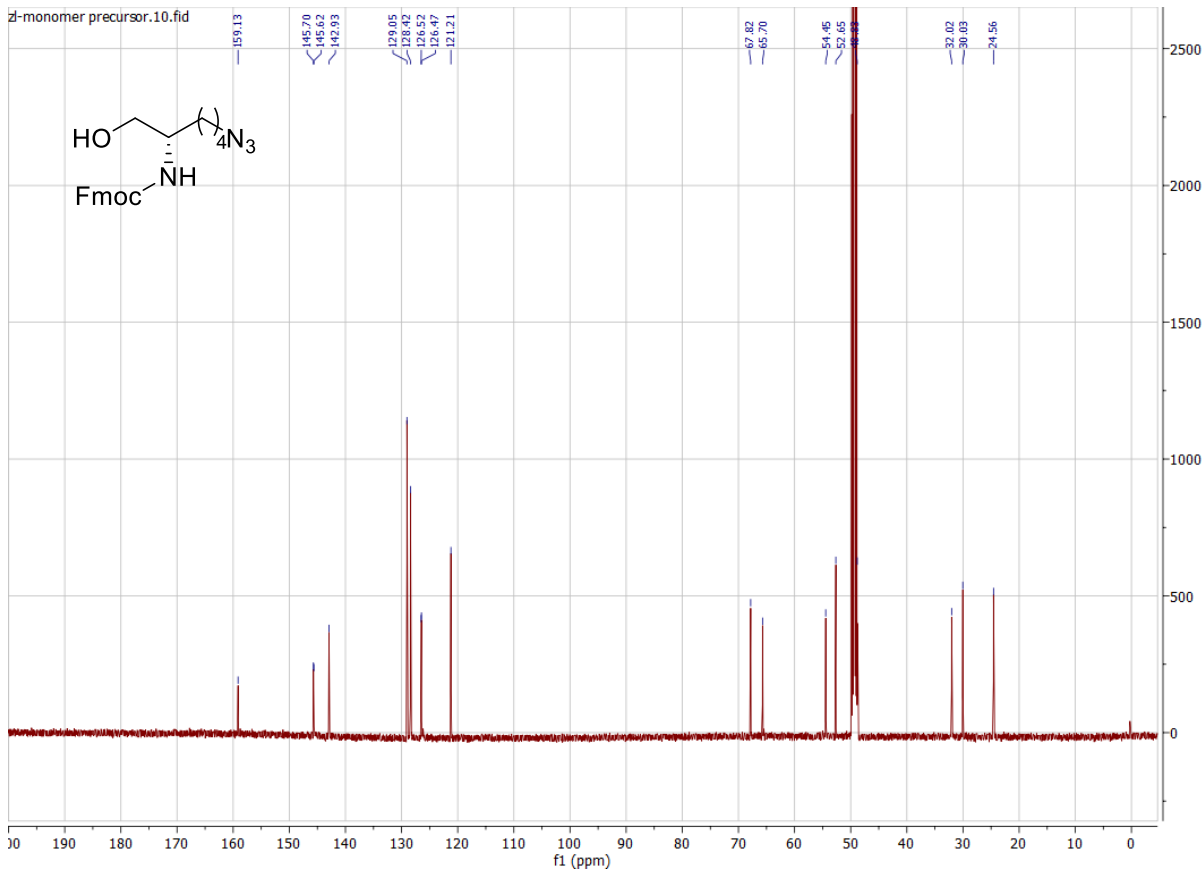

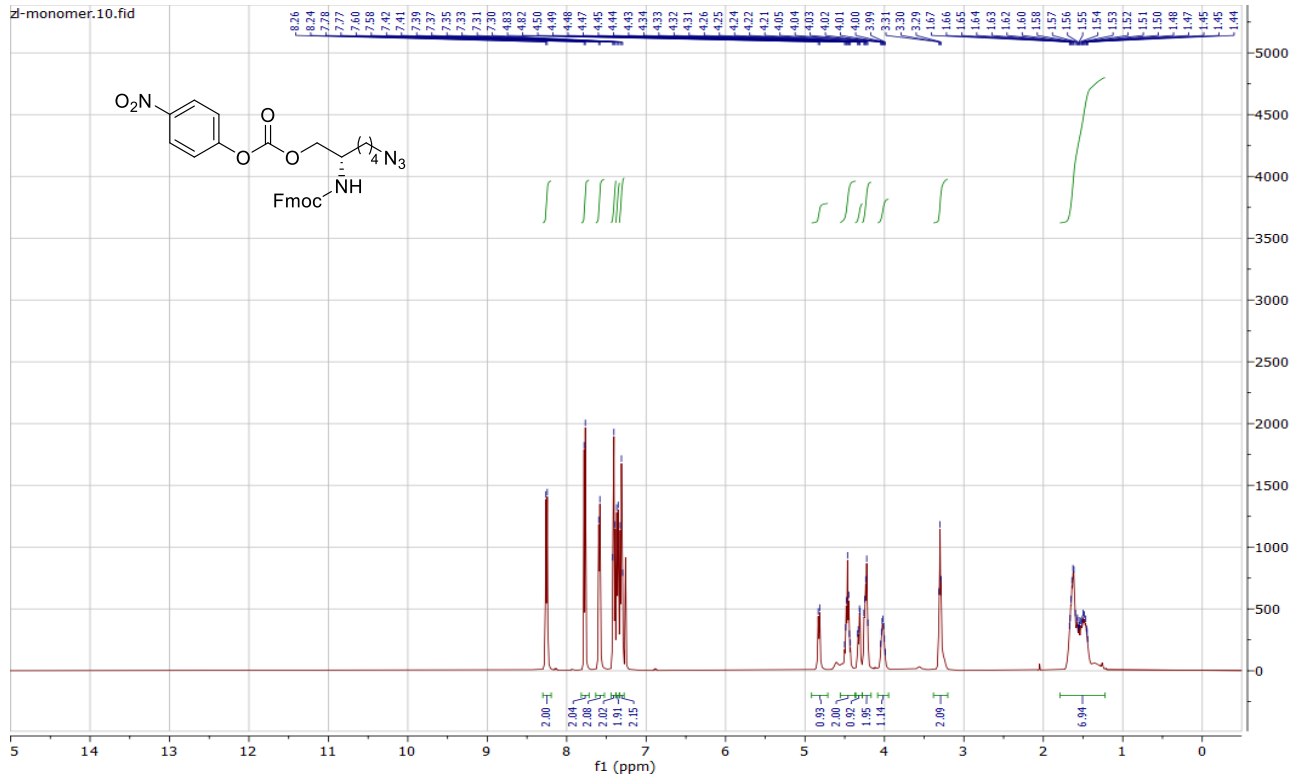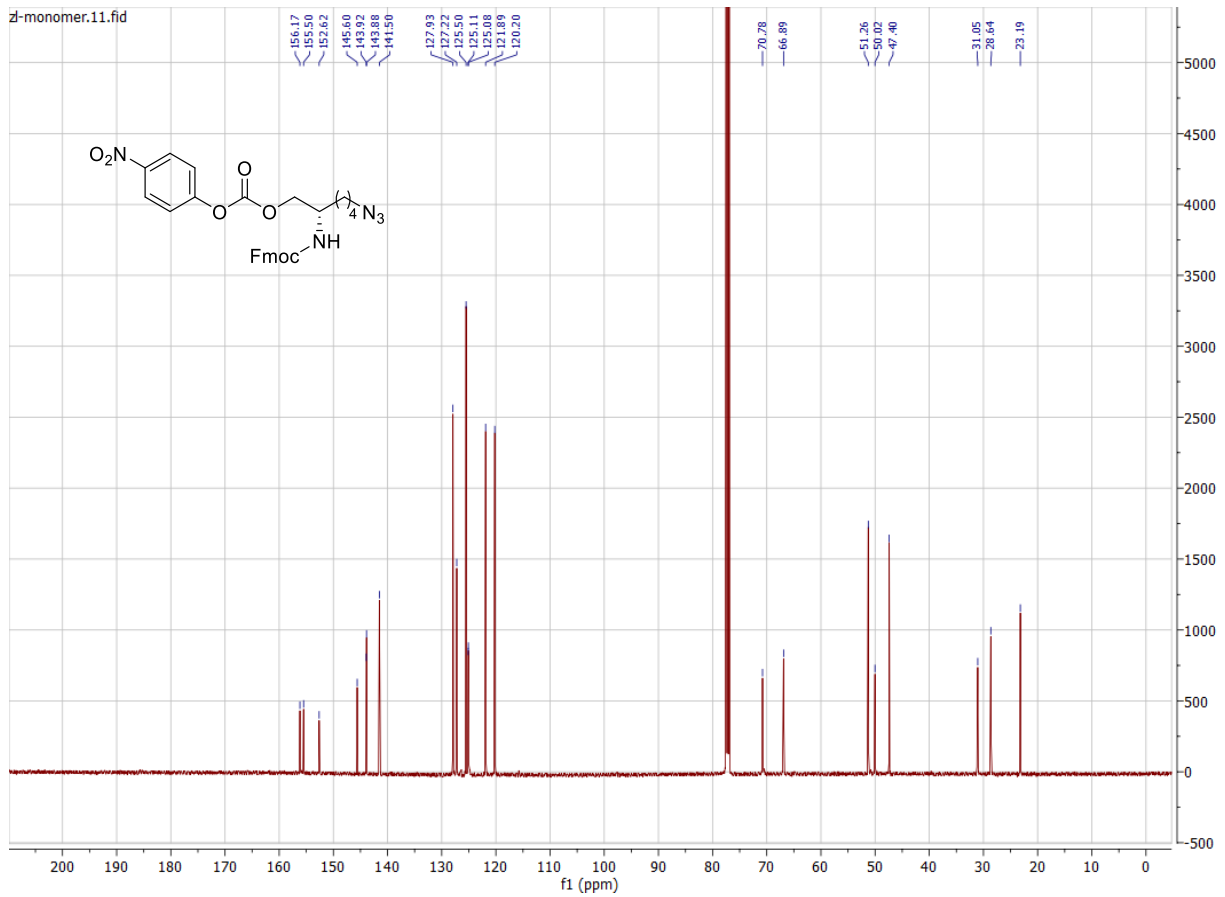



## II(b). General procedure for the solid-supported synthesis of oligourethanes

**Coupling:** Phenylalaninol loaded (0.44 mmol/gram, 200-400 mesh) 2-chlorotrityl polystyrene resin (40 mg, 0.0176 mmol) was added to a small fritted solid phase synthesis apparatus (5mL). The apparatus was then evacuated and backfilled with argon. The resin was suspended in 0.5 mL of anhydrous N-methyl-2-pyrrolidinone (NMP) and left to swell for 10 minutes. Next, Hunig's base (4.4  $\mu$ L, 0.025 mmol) was added, followed by hydroxybenzotriazole (13.4 mg, 0.10 mmol). The suspension was swirled for 30 seconds until everything was dissolved. Finally, the activated amino alcohol **2** (33.2 mg, 0.05 mmol) was added. Reaction was shaken for 8 hours on a shaker at room temperature. Resin was washed with NMP (5x3 mL), then DCM (5x3 mL), and finally Et<sub>2</sub>O (3x2 mL). Resin was dried overnight under vacuum. Test cleavages were effected with 1% TFA in DCM (5x0.2 mL) for 20 seconds each. Coupling efficiency was checked by LC/MS. NOTE: depending on the cleavage times and amounts of TFA used, the trifluoroacetic ester (presumably on the terminal alcohol) was observed by LC/MS. This ester was readily hydrolyzed by dissolving the sample in DCM and shaking with saturated NaHCO<sub>3</sub>.

**Solid phase CuAAC click chemistry:** To the oligourethanes on the resin (about 40 mg resin, 0.0176 mmol) in the 5 mL fritted solid phase synthesis apparatus, a terminal alkyne (5.0 eq.), sodium ascorbate (1.0 eq.), TBTA (1.0 eq.) and copper iodide (0.5 eq.) were added along with 0.7 mL DMF. The solid phase synthesis apparatus was sealed with a septum and purged with N<sub>2</sub> gas for 15 minutes. After degassing, parafilm was used to seal the septum on the solid phase synthesis apparatus to prevent oxygen from going into the apparatus. The reaction was placed on the shaker and agitated for 18 hours at room temperature. The resin was then collected by vacuum filtration and washed with NMP (5x3 mL), then DCM (5x3 mL), and finally Et<sub>2</sub>O (3x2 mL).

**Deprotection:** Resin loaded with terminal Fmoc-protected oligocarbamates (0.0176 mmol) suspended in 20% piperidine in DMF (3 mL) and shaken for 2 hours at room temperature. Cleavage of the dibenzofulvene-piperidine adduct was calculated by absorbance at 301 nm using Beer's Law. The resin was washed with DMF (5x3 mL), DCM (5x3 mL), Et<sub>2</sub>O (3x2 mL), and dried overnight under vacuum.

**General procedure for labelling of the terminal amine with a NBD-Fluoride (on resin):** To a fritted reaction vessel was added the oligomer (dimer, trimer or tetramer) on resin (0.0176 mmol). Vessel was evacuated and backfilled with argon. The resin was suspended and swelled in anhydrous DMF (2.4 mL) for 5 minutes. Next, DIPEA (41.76  $\mu$ L, 0.24 mmol) was added, followed by 4-fluoro-7-nitrobenzofurazan (33 mg, 0.179 mmol). Reaction was left to shake overnight. Resin was washed with DMF (5x16 mL), DCM (5x16 mL), and Et<sub>2</sub>O (3x8 mL).

**Cleavage procedure:** Cleavages were effected with 1% TFA in DCM (5x1 mL) for 20 seconds each at room temperature. Resin was filtered off, and cleaved product was concentrated. Oligomer was purified by reverse-phase preparatory HPLC (5-95% MeCN/H<sub>2</sub>O, 0.1% formic acid gradient elution).

## II(c). Determination of Conversions of Synthesized Oligourethanes

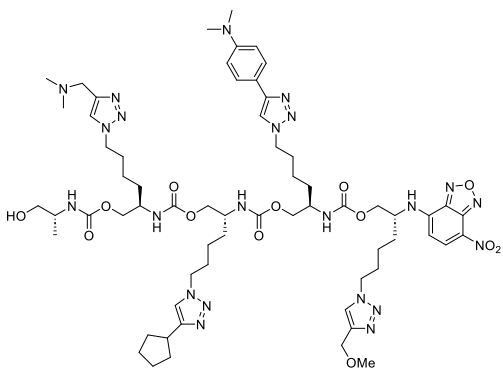

Oligomer 1: #6027

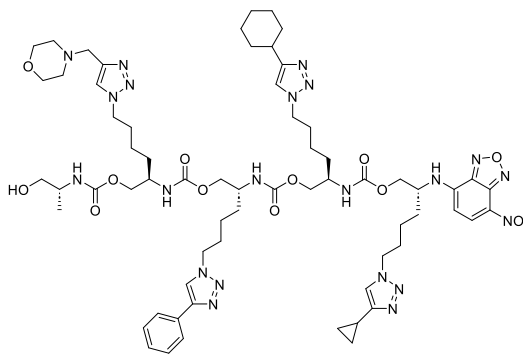

Oligomer 2: #8fd1

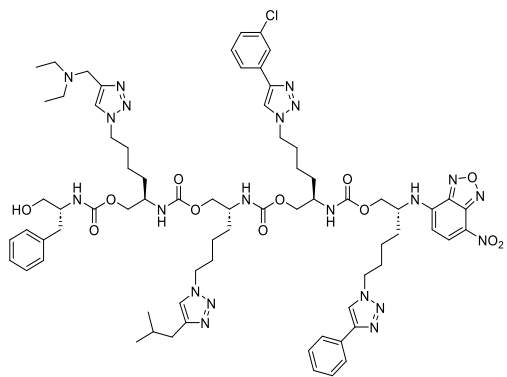

Oligomer 3: \*BDRW

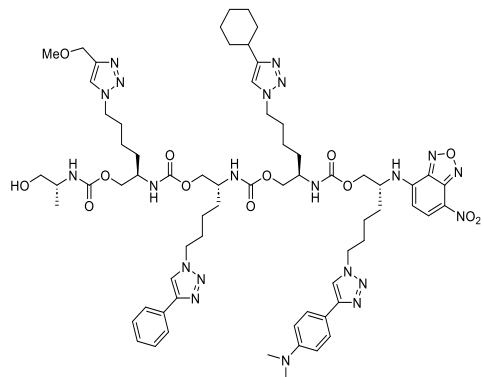

Oligomer 4: #7fd2

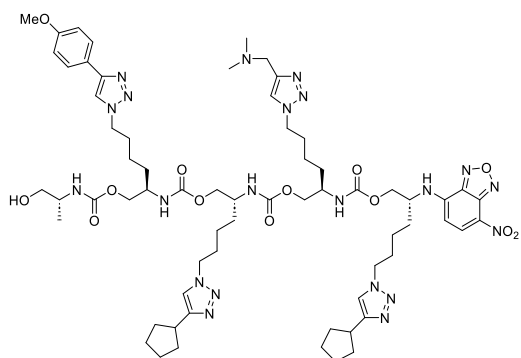

Oligomer 5: #9060

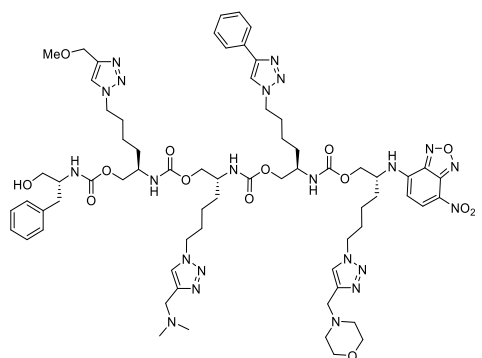

Oligomer 6: \*76f8

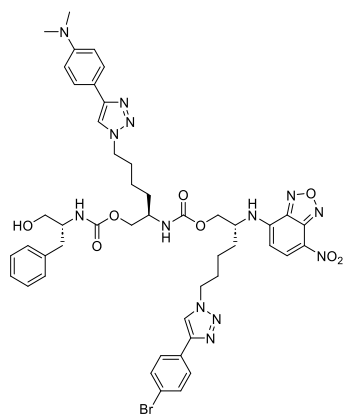

Oligomer Z1: \*YI

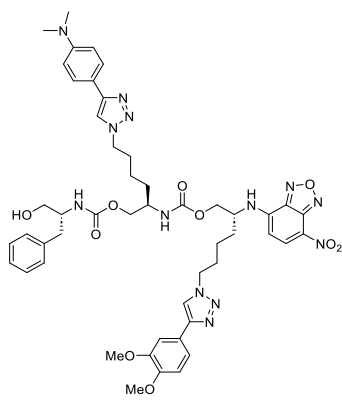

Oligomer Z2: \*YT

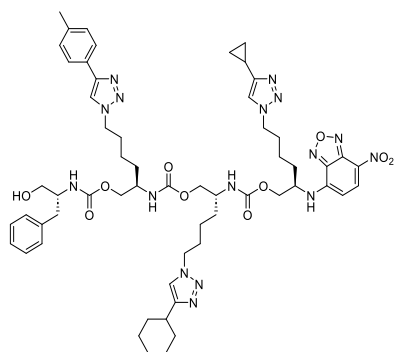

Oligomer Z3: \*UMC

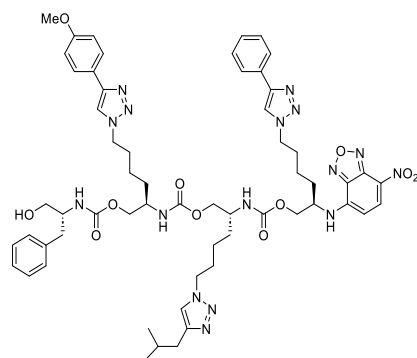

Oligomer Z4: \*PDW

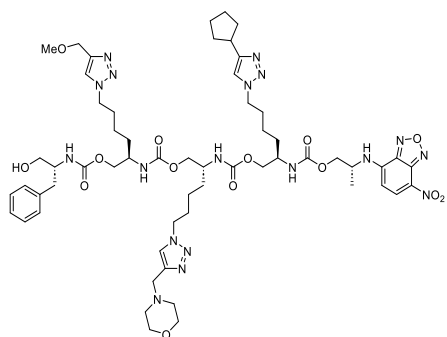

Oligomer Z5: \*FLVV

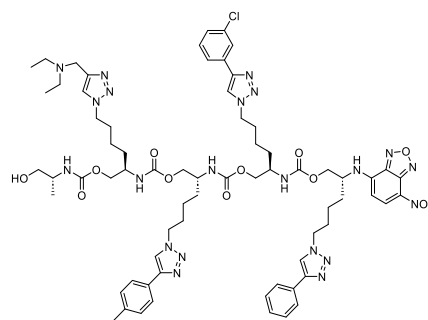

Oligomer Z6\_1: #4e5f

Table 1. The conversions of 12 synthesized oligourethanes

| Oligourethane | Conversion <sup>a</sup> | Oligourethane | Conversion <sup>a</sup> |
|---------------|-------------------------|---------------|-------------------------|
| 1             | 38%                     | Z1            | 80%                     |
| 2             | 81%                     | Z2            | 90%                     |
| 3             | 63%                     | Z3            | 83%                     |
| 4             | 77%                     | Z4            | 65%                     |
| 5             | 55%                     | Z5            | 65%                     |
| 6             | 48%                     | Z6            | 68%                     |

<sup>a</sup>Conversions were determined by the ratio of the peak area of product to the total peak area in LC trace.

### III. Sequencing experiments

#### III(a). General procedure for self-degradation (sequencing)

The sequencing procedure is adapted from previous work.<sup>1</sup> The oligomer (measured to be at a final concentration between 0.5-1 mM) was dissolved in methanol and added to a vial. Next, potassium phosphate tribasic monohydrate was dissolved in water and then added to the reaction solution. The final concentration of base was approximately 30 mM. The final ratio of methanol and water was 1:2.5, respectively. Before placing the vial on the heated shaker, the reaction was sampled for LC/MS by taking 50  $\mu$ L of the reaction mixture and diluted into 50  $\mu$ L of a 1:1 methanol: water mixture. The reaction was ramped quickly to 70 °C in the heated shaker and held at the temperature. The reaction was sampled every 60 minutes for 240 minutes.

#### III(b). Oligomer Sequencing Data:

Oligomer 1: #6027

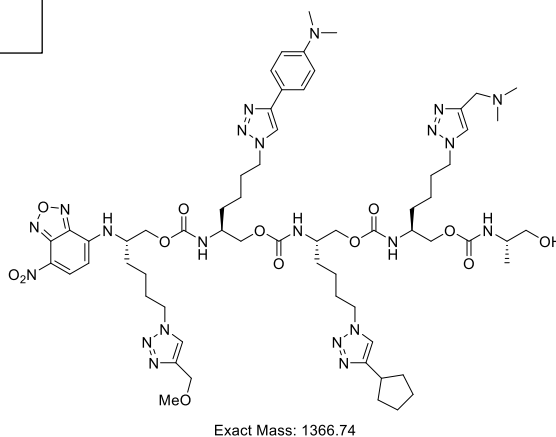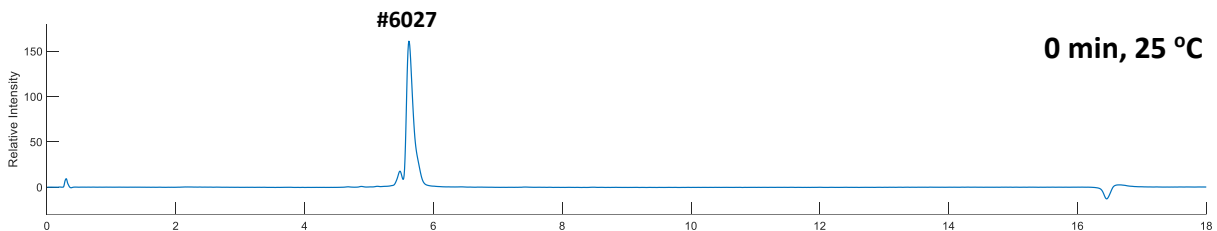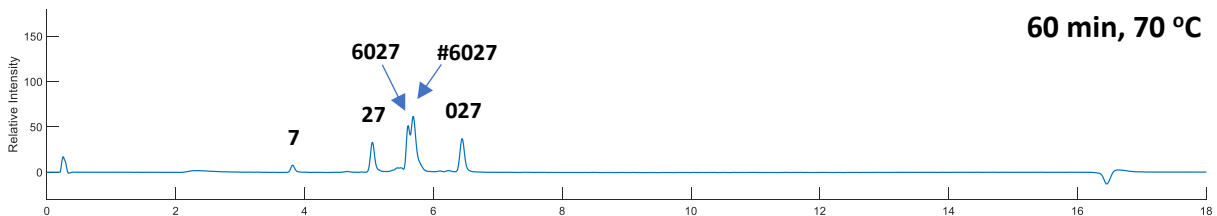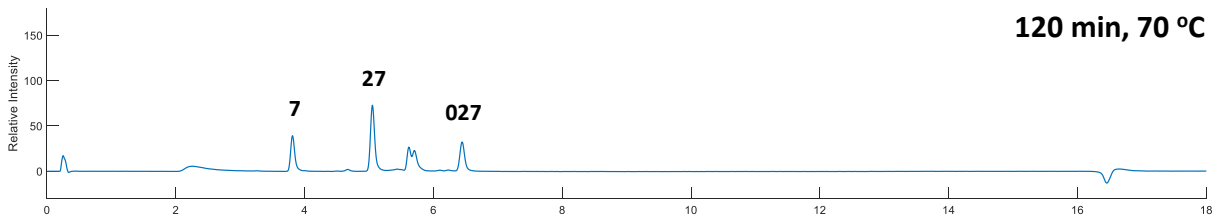

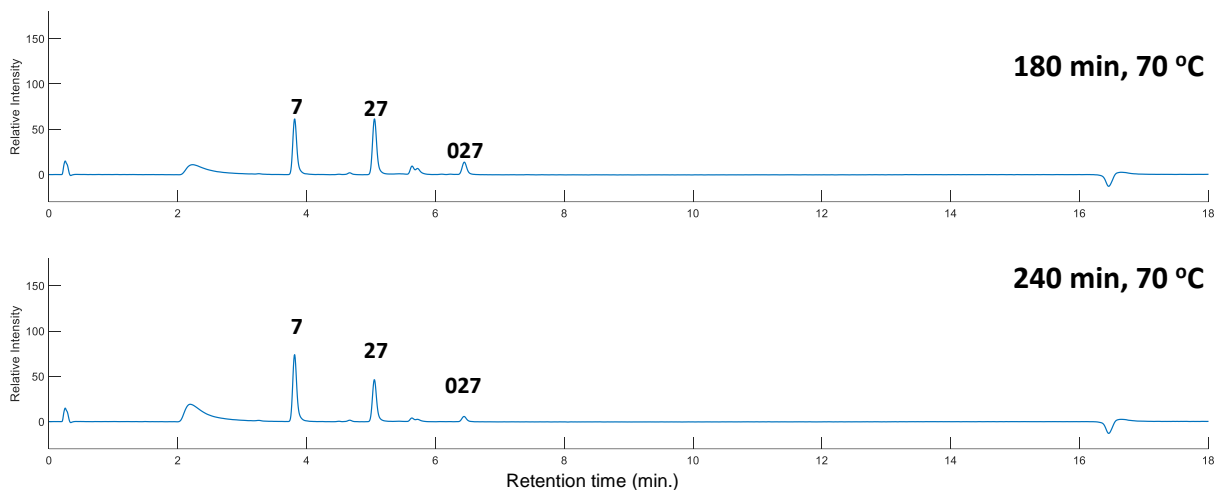

After 120 minutes of sequencing, all the following molecules are observed in the solution and analyzed via High-Res MS.

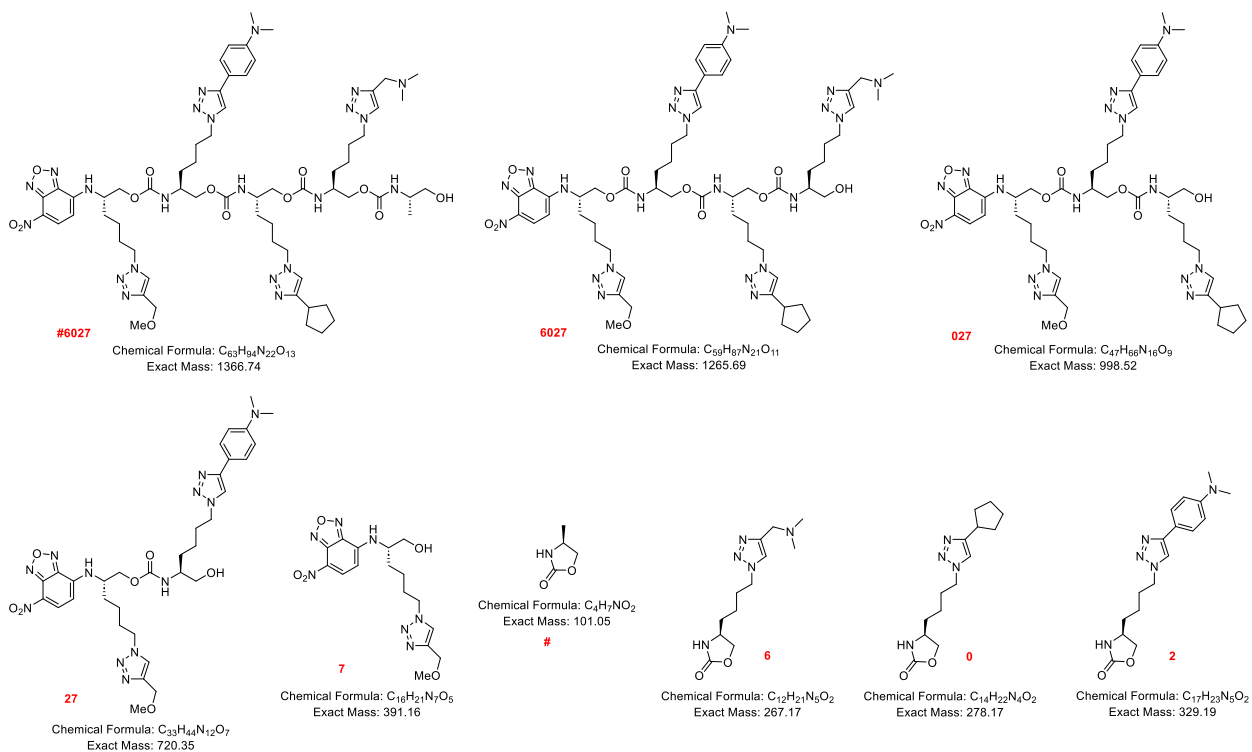

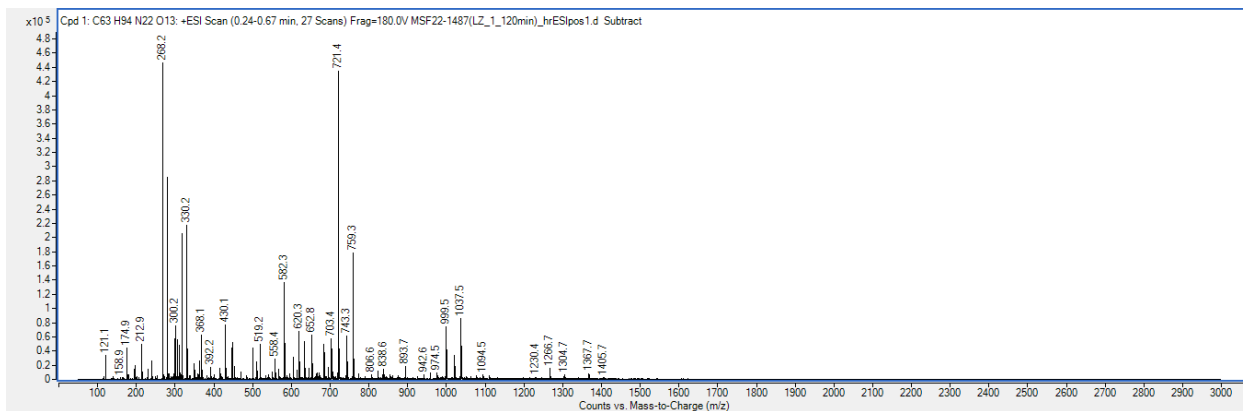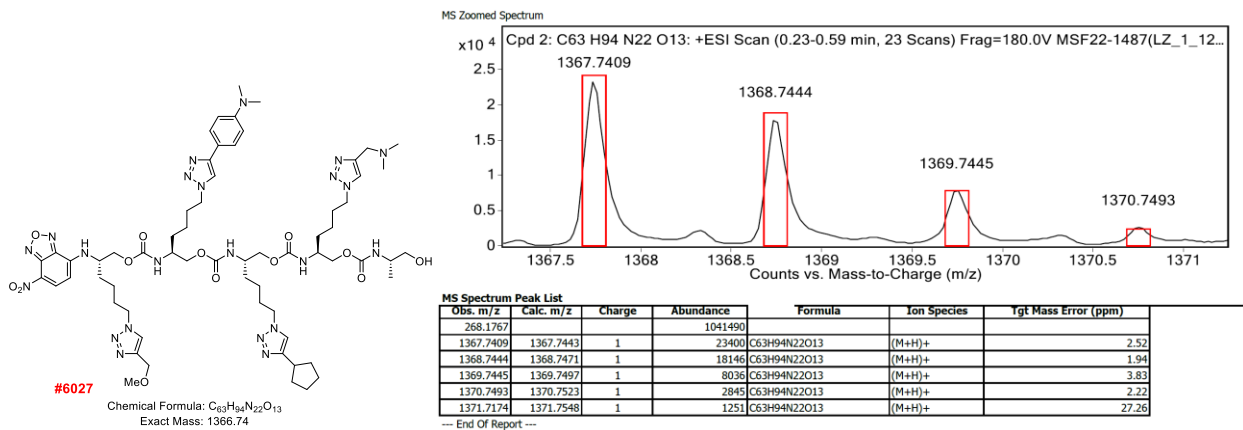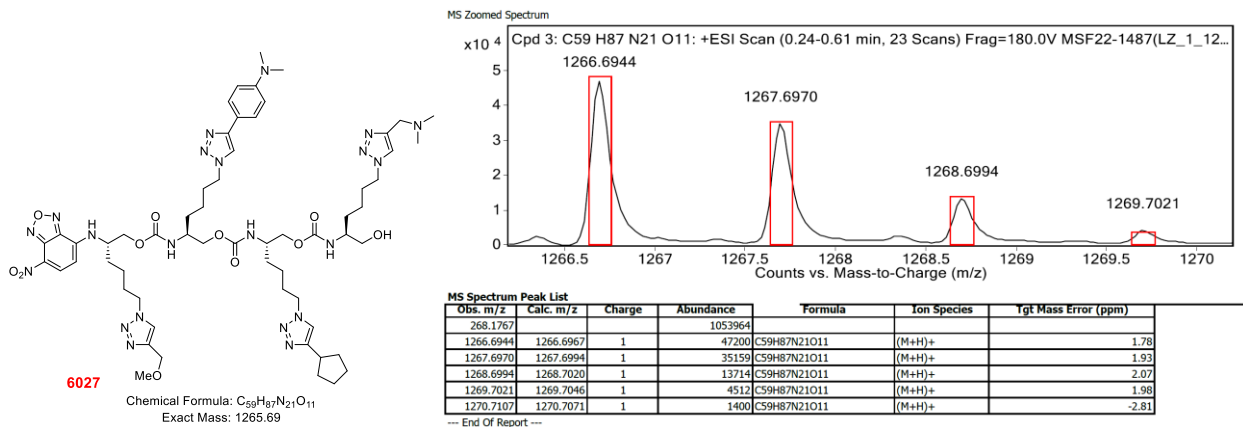

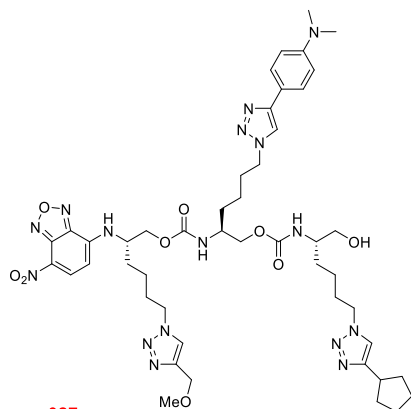

Chemical Formula: C<sub>47</sub>H<sub>66</sub>N<sub>16</sub>O<sub>9</sub>  
Exact Mass: 998.52

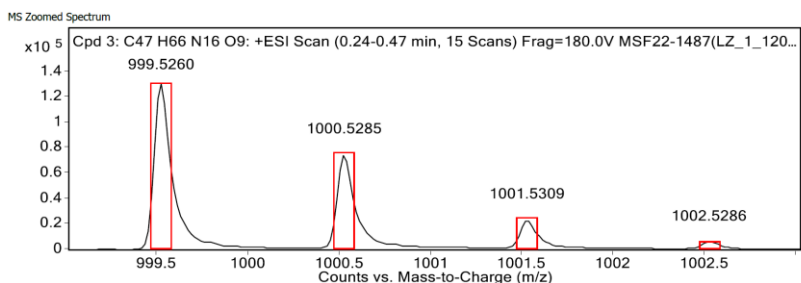

| Obs. m/z  | Calc. m/z | Charge | Abundance | Formula                                                        | Ion Species        | Tgt Mass Error (ppm) |
|-----------|-----------|--------|-----------|----------------------------------------------------------------|--------------------|----------------------|
| 721.3529  |           |        | 771717    |                                                                |                    |                      |
| 999.5260  | 999.5271  | 1      | 130544    | C <sub>47</sub> H <sub>66</sub> N <sub>16</sub> O <sub>9</sub> | (M+H) <sup>+</sup> | 1.18                 |
| 1000.5285 | 1000.5299 | 1      | 74346     | C <sub>47</sub> H <sub>66</sub> N <sub>16</sub> O <sub>9</sub> | (M+H) <sup>+</sup> | 1.37                 |
| 1001.5309 | 1001.5325 | 1      | 23107     | C <sub>47</sub> H <sub>66</sub> N <sub>16</sub> O <sub>9</sub> | (M+H) <sup>+</sup> | 1.63                 |
| 1002.5286 | 1002.5351 | 1      | 5701      | C <sub>47</sub> H <sub>66</sub> N <sub>16</sub> O <sub>9</sub> | (M+H) <sup>+</sup> | 6.43                 |
| 1003.5350 | 1003.5376 | 1      | 1579      | C <sub>47</sub> H <sub>66</sub> N <sub>16</sub> O <sub>9</sub> | (M+H) <sup>+</sup> | 2.57                 |

--- End Of Report ---

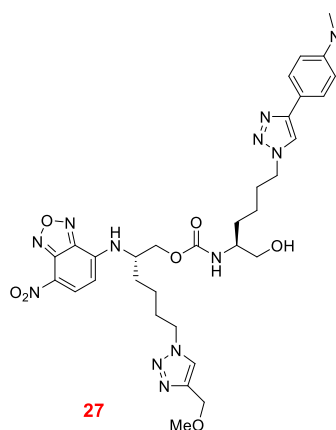

Chemical Formula: C<sub>33</sub>H<sub>44</sub>N<sub>12</sub>O<sub>7</sub>  
Exact Mass: 720.35

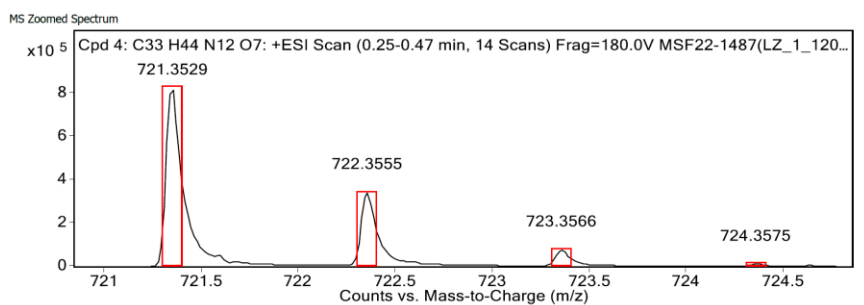

| Obs. m/z | Calc. m/z | Charge | Abundance | Formula                                                        | Ion Species        | Tgt Mass Error (ppm) |
|----------|-----------|--------|-----------|----------------------------------------------------------------|--------------------|----------------------|
| 721.3529 | 721.3529  | 1      | 824867    | C <sub>33</sub> H <sub>44</sub> N <sub>12</sub> O <sub>7</sub> | (M+H) <sup>+</sup> | -0.09                |
| 722.3555 | 722.3556  | 1      | 343106    | C <sub>33</sub> H <sub>44</sub> N <sub>12</sub> O <sub>7</sub> | (M+H) <sup>+</sup> | 0.11                 |
| 723.3566 | 723.3581  | 1      | 78562     | C <sub>33</sub> H <sub>44</sub> N <sub>12</sub> O <sub>7</sub> | (M+H) <sup>+</sup> | 2.05                 |
| 724.3575 | 724.3606  | 1      | 12158     | C <sub>33</sub> H <sub>44</sub> N <sub>12</sub> O <sub>7</sub> | (M+H) <sup>+</sup> | 4.25                 |
| 725.3664 | 725.3630  | 1      | 1865      | C <sub>33</sub> H <sub>44</sub> N <sub>12</sub> O <sub>7</sub> | (M+H) <sup>+</sup> | -4.7                 |
| 726.3640 | 726.3654  | 1      | 489       | C <sub>33</sub> H <sub>44</sub> N <sub>12</sub> O <sub>7</sub> | (M+H) <sup>+</sup> | 1.81                 |

--- End Of Report ---

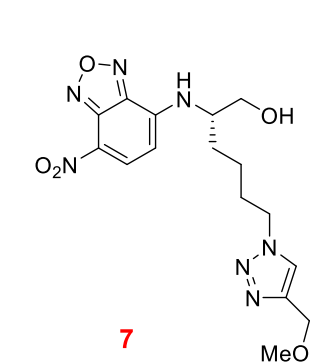

Chemical Formula: C<sub>16</sub>H<sub>21</sub>N<sub>7</sub>O<sub>5</sub>  
Exact Mass: 391.16

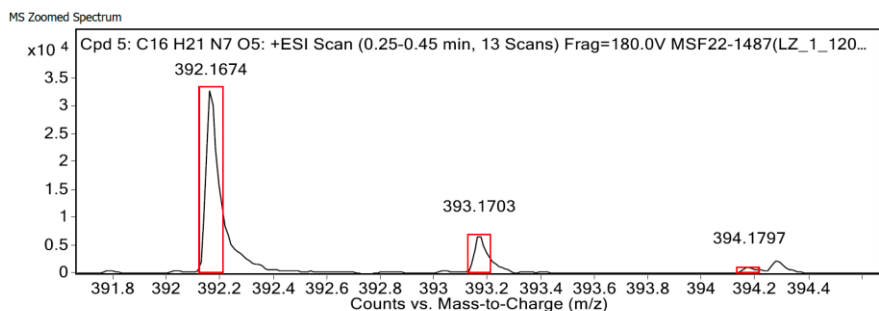

| Obs. m/z | Calc. m/z | Charge | Abundance | Formula                                                       | Ion Species        | Tgt Mass Error (ppm) |
|----------|-----------|--------|-----------|---------------------------------------------------------------|--------------------|----------------------|
| 392.1674 | 392.1677  | 1      | 33332     | C <sub>16</sub> H <sub>21</sub> N <sub>7</sub> O <sub>5</sub> | (M+H) <sup>+</sup> | 0.65                 |
| 393.1703 | 393.1703  | 1      | 6838      | C <sub>16</sub> H <sub>21</sub> N <sub>7</sub> O <sub>5</sub> | (M+H) <sup>+</sup> | -0.01                |
| 394.1797 | 394.1725  | 1      | 1093      | C <sub>16</sub> H <sub>21</sub> N <sub>7</sub> O <sub>5</sub> | (M+H) <sup>+</sup> | -18.26               |
| 721.3529 |           |        | 875111    |                                                               |                    |                      |

--- End Of Report ---

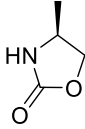

Chemical Formula: C<sub>4</sub>H<sub>7</sub>NO<sub>2</sub>  
Exact Mass: 101.05

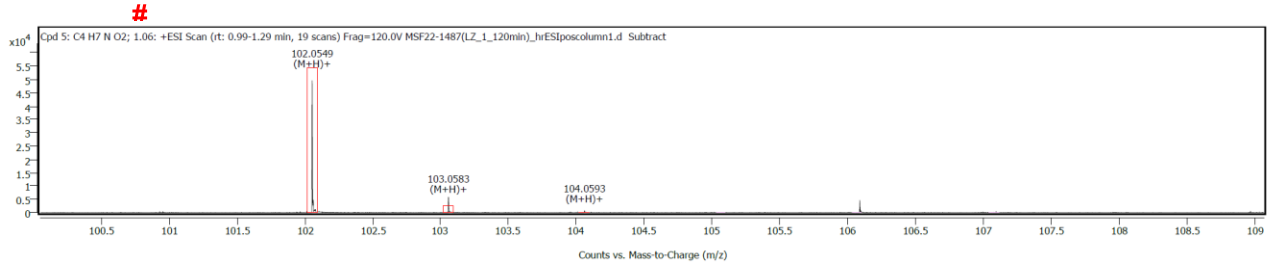

Spectrum Peaks

| Obs. m/z | Calc. m/z | Charge | Abund | Formula | Ion Species | Tgt Mass Error (PPM) |
|----------|-----------|--------|-------|---------|-------------|----------------------|
| 102.0549 | 102.0550  | 1      | 50756 | C4H7NO2 | (M+H)+      | -0.76                |
| 103.0583 | 103.0579  | 1      | 5789  | C4H7NO2 | (M+H)+      | 3.83                 |
| 104.0593 | 104.0595  | 1      | 629   | C4H7NO2 | (M+H)+      | -2.17                |

MassHunter Qual 10.0  
(End of Report)

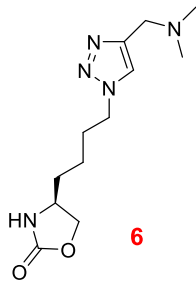

6

Chemical Formula: C<sub>12</sub>H<sub>21</sub>N<sub>5</sub>O<sub>2</sub>  
Exact Mass: 267.17

MS Zoomed Spectrum

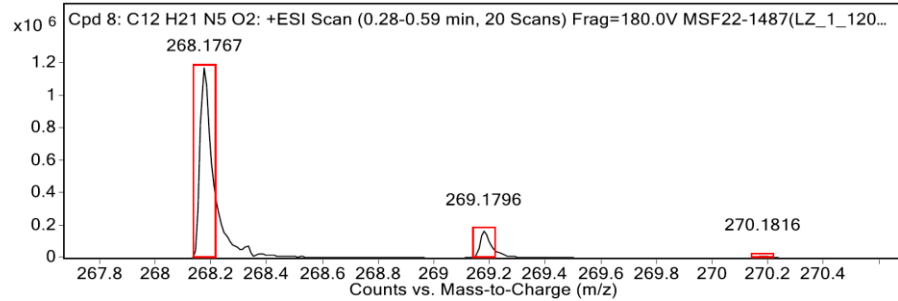

MS Spectrum Peak List

| Obs. m/z | Calc. m/z | Charge | Abundance | Formula    | Ion Species | Tgt Mass Error (ppm) |
|----------|-----------|--------|-----------|------------|-------------|----------------------|
| 268.1767 | 268.1768  | 1      | 1189627   | C12H21N5O2 | (M+H)+      | 0.35                 |
| 269.1796 | 269.1794  | 1      | 172121    | C12H21N5O2 | (M+H)+      | -0.64                |
| 270.1816 | 270.1818  | 1      | 16955     | C12H21N5O2 | (M+H)+      | 0.49                 |
| 271.1826 | 271.1841  | 1      | 1973      | C12H21N5O2 | (M+H)+      | 5.51                 |

--- End Of Report ---

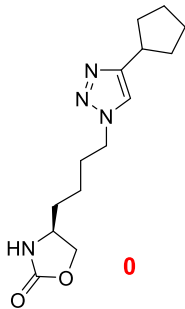

0

Chemical Formula: C<sub>14</sub>H<sub>22</sub>N<sub>4</sub>O<sub>2</sub>  
Exact Mass: 278.17

MS Zoomed Spectrum

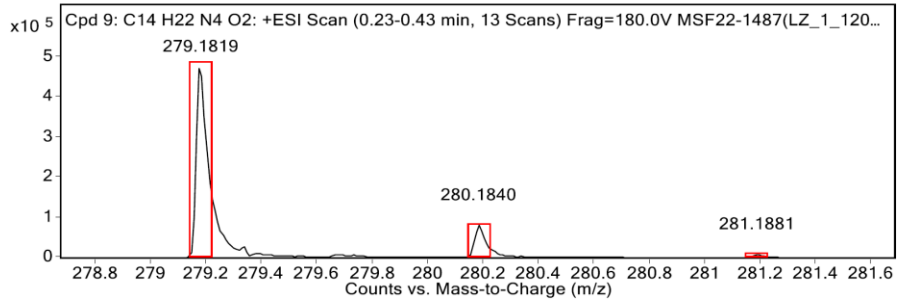

MS Spectrum Peak List

| Obs. m/z | Calc. m/z | Charge | Abundance | Formula    | Ion Species | Tgt Mass Error (ppm) |
|----------|-----------|--------|-----------|------------|-------------|----------------------|
| 268.1766 |           |        | 990696    |            |             |                      |
| 279.1819 | 279.1816  | 1      | 485039    | C14H22N4O2 | (M+H)+      | -1.17                |
| 280.1840 | 280.1844  | 1      | 81153     | C14H22N4O2 | (M+H)+      | 1.49                 |
| 281.1881 | 281.1869  | 1      | 8885      | C14H22N4O2 | (M+H)+      | -4.25                |

--- End Of Report ---



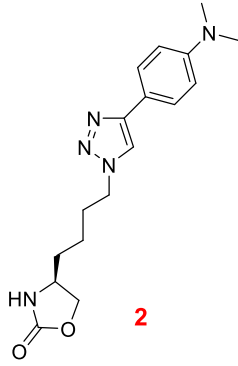

Chemical Formula:  $C_{17}H_{23}N_5O_2$   
 Exact Mass: 329.19

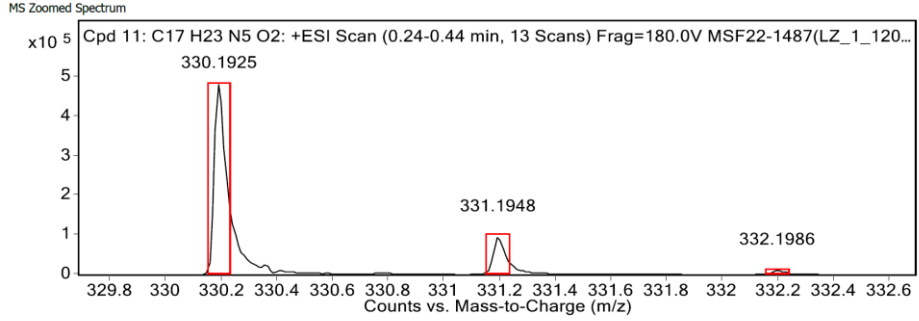

| Obs. m/z | Calc. m/z | Charge | Abundance | Formula              | Ion Species        | Tgt Mass Error (ppm) |
|----------|-----------|--------|-----------|----------------------|--------------------|----------------------|
| 268.1766 |           |        | 1147487   |                      |                    |                      |
| 330.1925 | 330.1925  | 1      | 483892    | $C_{17}H_{23}N_5O_2$ | (M+H) <sup>+</sup> | -0.29                |
| 331.1948 | 331.1953  | 1      | 97276     | $C_{17}H_{23}N_5O_2$ | (M+H) <sup>+</sup> | 1.41                 |
| 332.1986 | 332.1979  | 1      | 12985     | $C_{17}H_{23}N_5O_2$ | (M+H) <sup>+</sup> | -2.29                |

**Oligomer 2: #8fd1**

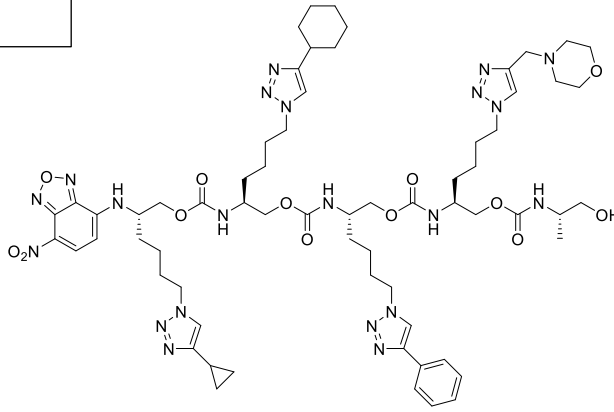

Exact Mass: 1375.73

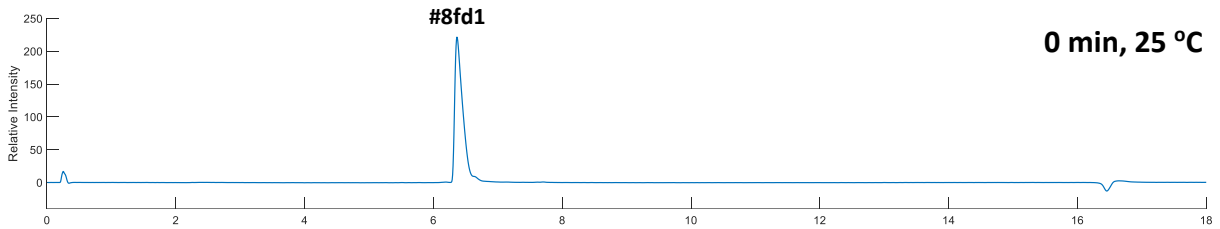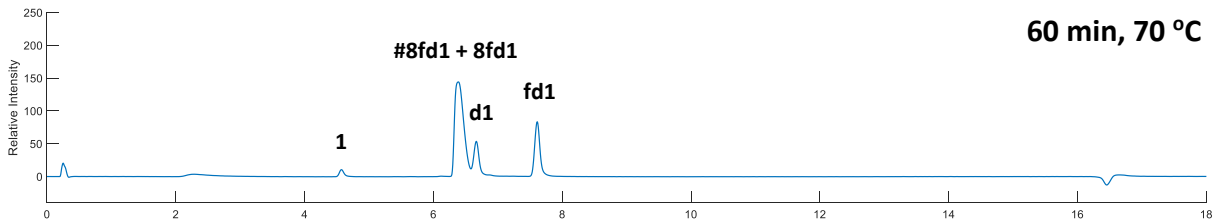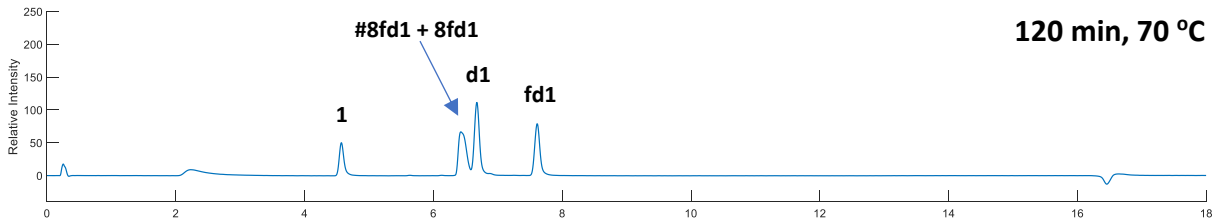

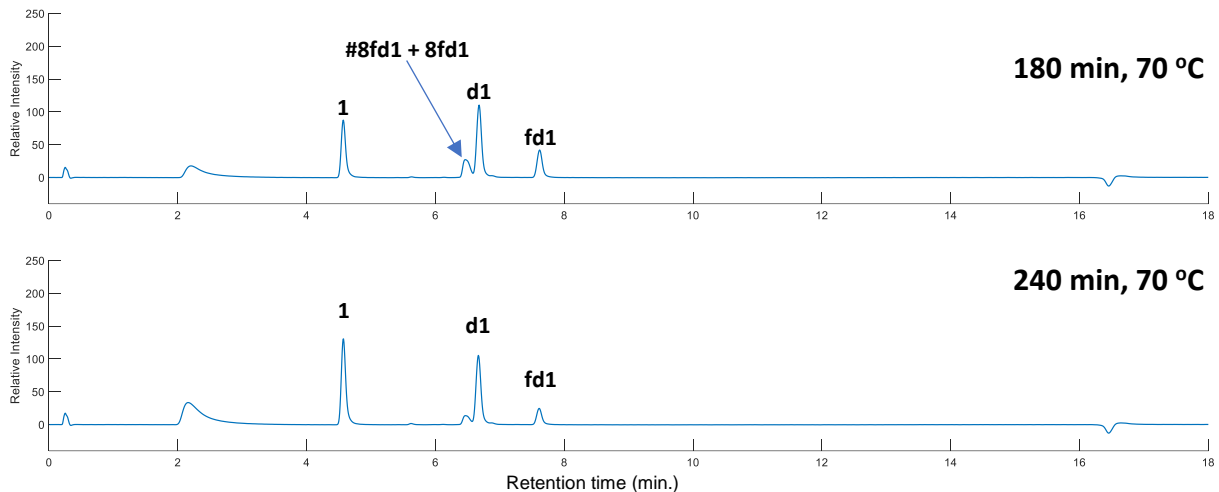

After 120 minutes of sequencing, all the following molecules are observed in the solution and analyzed via High-Res MS.

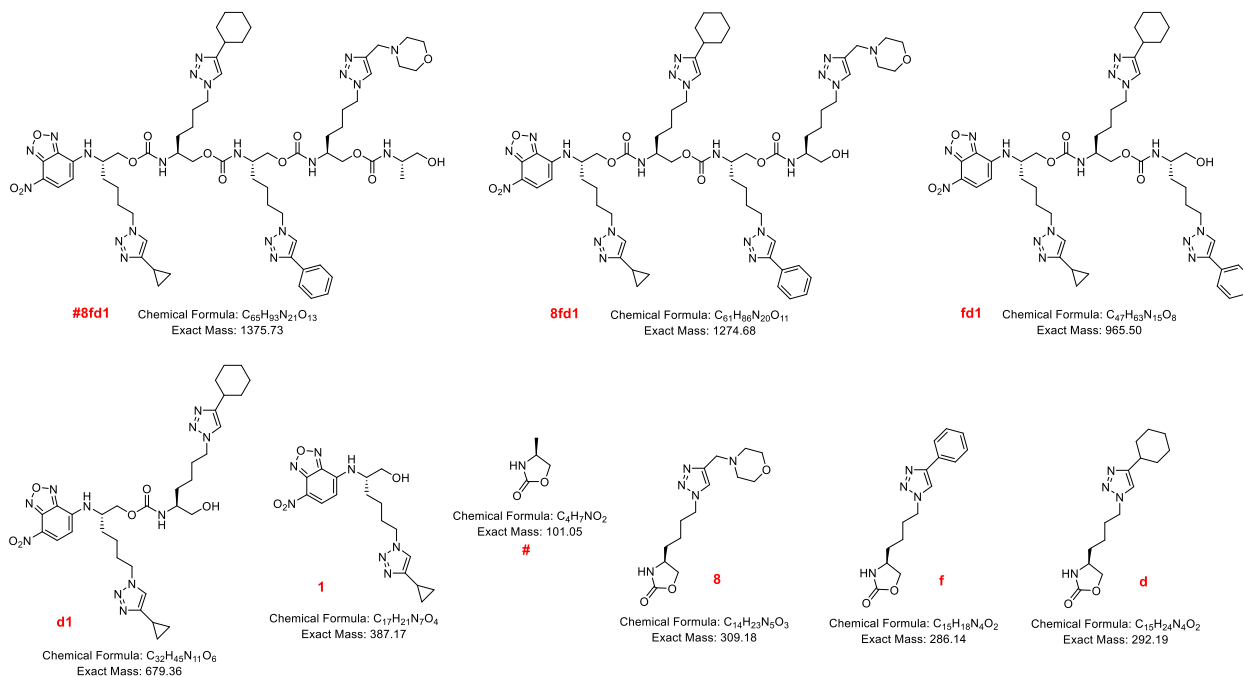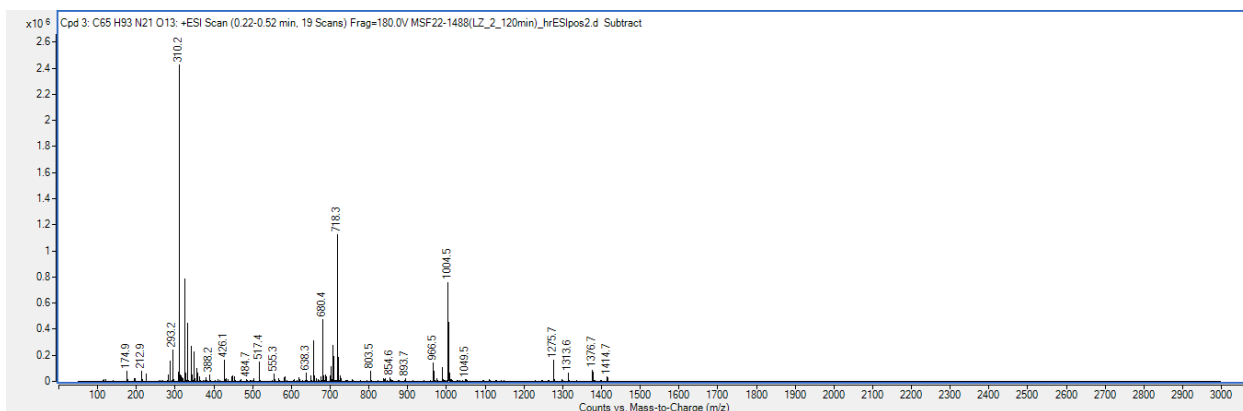

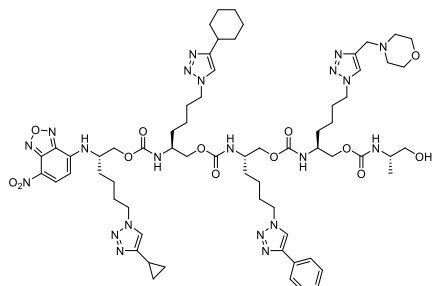

**#8fd1** Chemical Formula:  $C_{65}H_{93}N_{21}O_{13}$   
Exact Mass: 1375.73

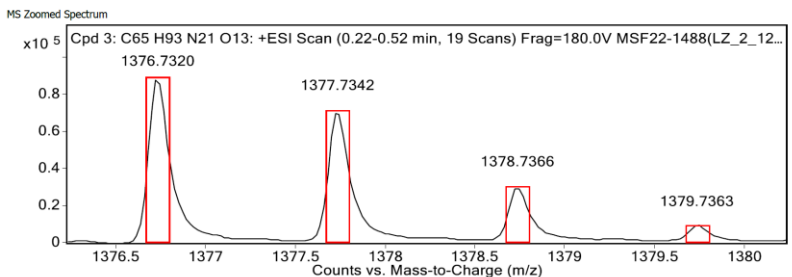

MS Spectrum Peak List

| Obs. m/z  | Calc. m/z | Charge | Abundance | Formula      | Ion Species | Tgt Mass Error (ppm) |
|-----------|-----------|--------|-----------|--------------|-------------|----------------------|
| 310.1872  |           |        | 2446754   |              |             |                      |
| 1376.7320 | 1376.7334 | 1      | 89269     | C65H93N21O13 | (M+H)+      | 1.03                 |
| 1377.7342 | 1377.7362 | 1      | 71284     | C65H93N21O13 | (M+H)+      | 1.52                 |
| 1378.7366 | 1378.7389 | 1      | 30031     | C65H93N21O13 | (M+H)+      | 1.68                 |
| 1379.7363 | 1379.7415 | 1      | 8537      | C65H93N21O13 | (M+H)+      | 3.78                 |
| 1380.7370 | 1380.7441 | 1      | 2244      | C65H93N21O13 | (M+H)+      | 5.15                 |
| 1381.7188 | 1381.7466 | 1      | 769       | C65H93N21O13 | (M+H)+      | 20.12                |

--- End Of Report ---

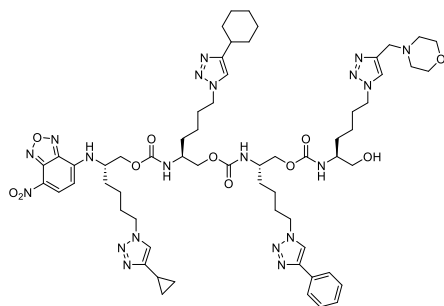

**8fd1** Chemical Formula:  $C_{61}H_{86}N_{20}O_{11}$   
Exact Mass: 1274.68

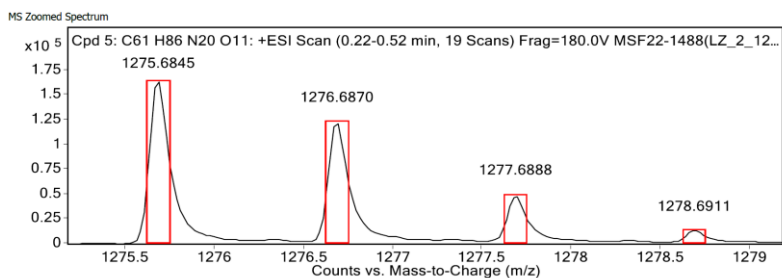

MS Spectrum Peak List

| Obs. m/z  | Calc. m/z | Charge | Abundance | Formula      | Ion Species | Tgt Mass Error (ppm) |
|-----------|-----------|--------|-----------|--------------|-------------|----------------------|
| 310.1872  |           |        | 2446588   |              |             |                      |
| 1275.6845 | 1275.6858 | 1      | 164259    | C61H86N20O11 | (M+H)+      | 0.99                 |
| 1276.6870 | 1276.6886 | 1      | 121823    | C61H86N20O11 | (M+H)+      | 1.24                 |
| 1277.6888 | 1277.6912 | 1      | 48473     | C61H86N20O11 | (M+H)+      | 1.89                 |
| 1278.6911 | 1278.6938 | 1      | 11885     | C61H86N20O11 | (M+H)+      | 2.15                 |
| 1279.6918 | 1279.6964 | 1      | 3160      | C61H86N20O11 | (M+H)+      | 3.58                 |
| 1280.6949 | 1280.6989 | 1      | 757       | C61H86N20O11 | (M+H)+      | 3.09                 |

--- End Of Report ---

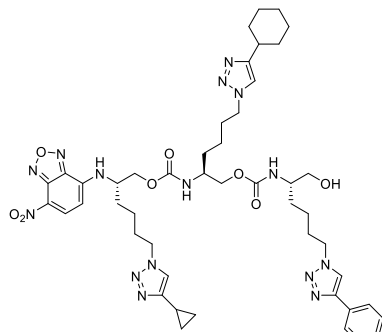

**fd1** Chemical Formula:  $C_{47}H_{63}N_{15}O_8$   
Exact Mass: 965.50

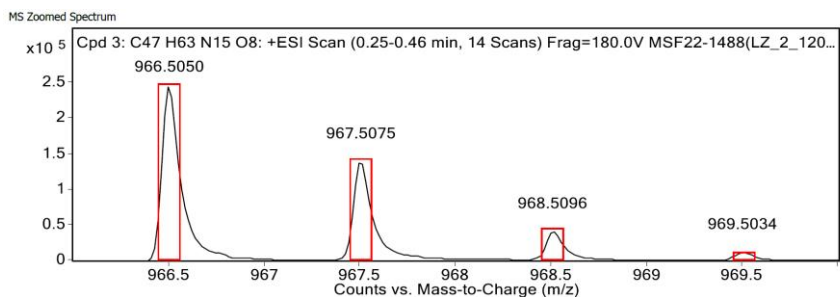

MS Spectrum Peak List

| Obs. m/z | Calc. m/z | Charge | Abundance | Formula     | Ion Species | Tgt Mass Error (ppm) |
|----------|-----------|--------|-----------|-------------|-------------|----------------------|
| 310.1870 |           |        | 2305930   |             |             |                      |
| 966.5050 | 966.5057  | 1      | 246291    | C47H63N15O8 | (M+H)+      | 0.66                 |
| 967.5075 | 967.5085  | 1      | 140196    | C47H63N15O8 | (M+H)+      | 1.02                 |
| 968.5096 | 968.5111  | 1      | 41736     | C47H63N15O8 | (M+H)+      | 1.62                 |
| 969.5034 | 969.5137  | 1      | 12513     | C47H63N15O8 | (M+H)+      | 10.61                |
| 970.4985 | 970.5162  | 1      | 4219      | C47H63N15O8 | (M+H)+      | 18.32                |

--- End Of Report ---

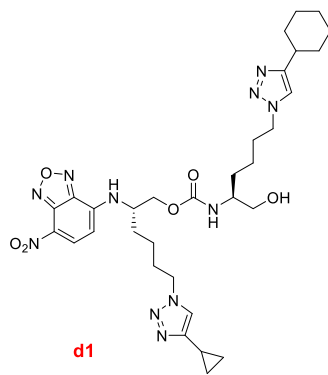

Chemical Formula: C<sub>32</sub>H<sub>45</sub>N<sub>11</sub>O<sub>6</sub>  
Exact Mass: 679.36

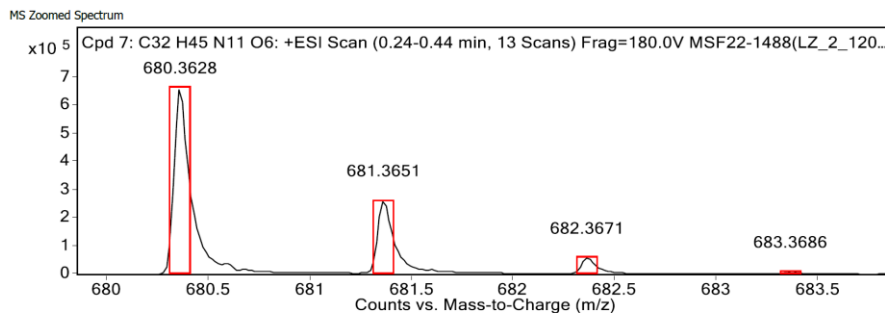

MS Spectrum Peak List

| Obs. m/z | Calc. m/z | Charge | Abundance | Formula                                                        | Ion Species        | Tgt Mass Error (ppm) |
|----------|-----------|--------|-----------|----------------------------------------------------------------|--------------------|----------------------|
| 310.1870 |           |        | 3191834   |                                                                |                    |                      |
| 680.3628 | 680.3627  | 1      | 661522    | C <sub>32</sub> H <sub>45</sub> N <sub>11</sub> O <sub>6</sub> | (M+H) <sup>+</sup> | -0.07                |
| 681.3651 | 681.3655  | 1      | 262285    | C <sub>32</sub> H <sub>45</sub> N <sub>11</sub> O <sub>6</sub> | (M+H) <sup>+</sup> | 0.45                 |
| 682.3671 | 682.3680  | 1      | 57962     | C <sub>32</sub> H <sub>45</sub> N <sub>11</sub> O <sub>6</sub> | (M+H) <sup>+</sup> | 1.35                 |
| 683.3686 | 683.3705  | 1      | 8507      | C <sub>32</sub> H <sub>45</sub> N <sub>11</sub> O <sub>6</sub> | (M+H) <sup>+</sup> | 2.72                 |

--- End Of Report ---

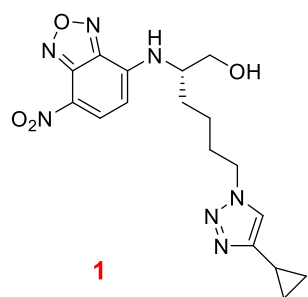

Chemical Formula: C<sub>17</sub>H<sub>21</sub>N<sub>7</sub>O<sub>4</sub>  
Exact Mass: 387.17

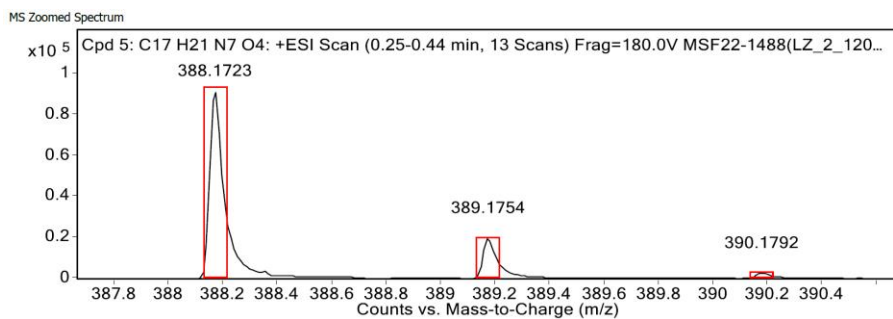

MS Spectrum Peak List

| Obs. m/z | Calc. m/z | Charge | Abundance | Formula                                                       | Ion Species        | Tgt Mass Error (ppm) |
|----------|-----------|--------|-----------|---------------------------------------------------------------|--------------------|----------------------|
| 310.1870 |           |        | 2367508   |                                                               |                    |                      |
| 388.1723 | 388.1728  | 1      | 92331     | C <sub>17</sub> H <sub>21</sub> N <sub>7</sub> O <sub>4</sub> | (M+H) <sup>+</sup> | 1.2                  |
| 389.1754 | 389.1754  | 1      | 20048     | C <sub>17</sub> H <sub>21</sub> N <sub>7</sub> O <sub>4</sub> | (M+H) <sup>+</sup> | -0.07                |
| 390.1792 | 390.1777  | 1      | 2938      | C <sub>17</sub> H <sub>21</sub> N <sub>7</sub> O <sub>4</sub> | (M+H) <sup>+</sup> | -3.77                |

--- End Of Report ---

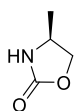

Chemical Formula: C<sub>4</sub>H<sub>7</sub>NO<sub>2</sub>  
Exact Mass: 101.05

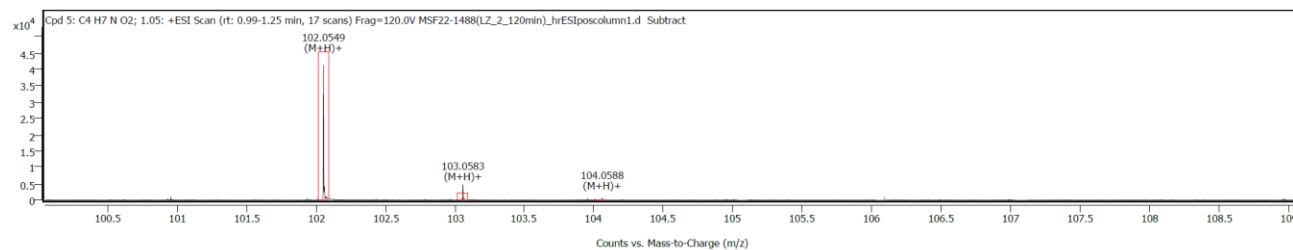

Spectrum Peaks

| Obs. m/z | Calc. m/z | Charge | Abund | Formula                                       | Ion Species        | Tgt Mass Error (PPM) |
|----------|-----------|--------|-------|-----------------------------------------------|--------------------|----------------------|
| 102.0549 | 102.0550  | 1      | 42443 | C <sub>4</sub> H <sub>7</sub> NO <sub>2</sub> | (M+H) <sup>+</sup> | -0.82                |
| 103.0583 | 103.0579  | 1      | 4632  | C <sub>4</sub> H <sub>7</sub> NO <sub>2</sub> | (M+H) <sup>+</sup> | 3.39                 |
| 104.0588 | 104.0595  | 1      | 531   | C <sub>4</sub> H <sub>7</sub> NO <sub>2</sub> | (M+H) <sup>+</sup> | -6.40                |

MassHunter Qual 10.0  
(End of Report)

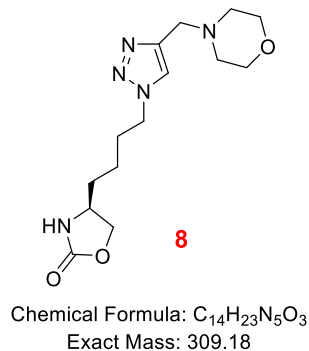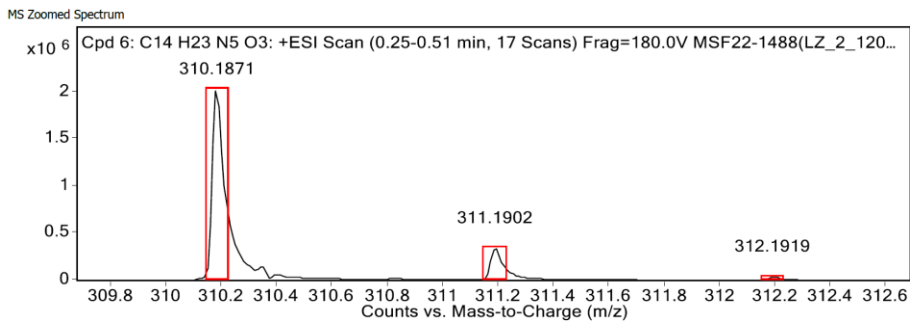

MS Spectrum Peak List

| Obs. m/z | Calc. m/z | Charge | Abundance | Formula              | Ion Species        | Tgt Mass Error (ppm) |
|----------|-----------|--------|-----------|----------------------|--------------------|----------------------|
| 310.1871 | 310.1874  | 1      | 2034225   | $C_{14}H_{23}N_5O_3$ | (M+H) <sup>+</sup> | 0.78                 |
| 311.1902 | 311.1901  | 1      | 341235    | $C_{14}H_{23}N_5O_3$ | (M+H) <sup>+</sup> | -0.45                |
| 312.1919 | 312.1924  | 1      | 39422     | $C_{14}H_{23}N_5O_3$ | (M+H) <sup>+</sup> | 1.67                 |
| 313.1938 | 313.1948  | 1      | 3118      | $C_{14}H_{23}N_5O_3$ | (M+H) <sup>+</sup> | 3.32                 |

--- End Of Report ---

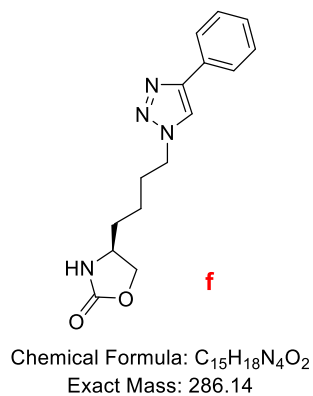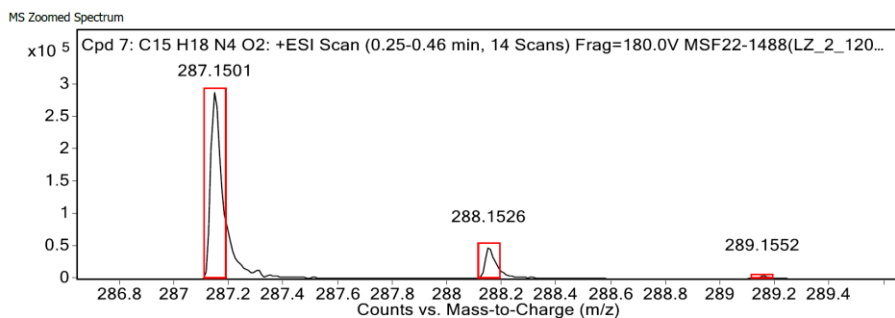

MS Spectrum Peak List

| Obs. m/z | Calc. m/z | Charge | Abundance | Formula              | Ion Species        | Tgt Mass Error (ppm) |
|----------|-----------|--------|-----------|----------------------|--------------------|----------------------|
| 287.1501 | 287.1503  | 1      | 293256    | $C_{15}H_{18}N_4O_2$ | (M+H) <sup>+</sup> | 0.57                 |
| 288.1526 | 288.1531  | 1      | 50002     | $C_{15}H_{18}N_4O_2$ | (M+H) <sup>+</sup> | 1.97                 |
| 289.1552 | 289.1557  | 1      | 5938      | $C_{15}H_{18}N_4O_2$ | (M+H) <sup>+</sup> | 1.7                  |
| 290.1221 | 290.1581  | 1      | 333       | $C_{15}H_{18}N_4O_2$ | (M+H) <sup>+</sup> | 124.14               |
| 310.1870 |           |        | 2299386   |                      |                    |                      |

--- End Of Report ---

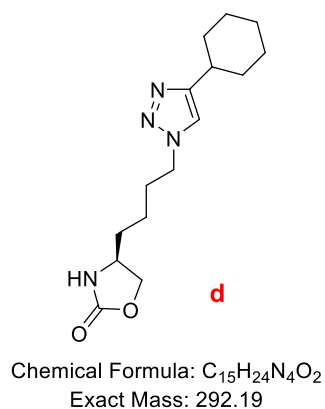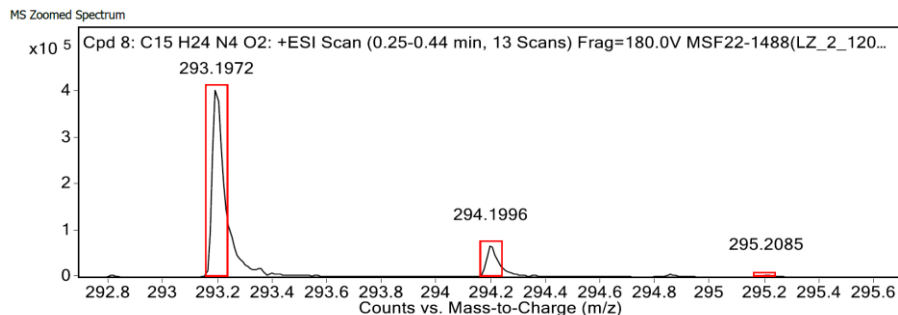

MS Spectrum Peak List

| Obs. m/z | Calc. m/z | Charge | Abundance | Formula              | Ion Species        | Tgt Mass Error (ppm) |
|----------|-----------|--------|-----------|----------------------|--------------------|----------------------|
| 293.1972 | 293.1972  | 1      | 412036    | $C_{15}H_{24}N_4O_2$ | (M+H) <sup>+</sup> | -0.03                |
| 294.1996 | 294.2001  | 1      | 69917     | $C_{15}H_{24}N_4O_2$ | (M+H) <sup>+</sup> | 1.67                 |
| 295.2085 | 295.2026  | 1      | 5729      | $C_{15}H_{24}N_4O_2$ | (M+H) <sup>+</sup> | -19.74               |
| 296.1461 | 296.2051  | 1      | 370       | $C_{15}H_{24}N_4O_2$ | (M+H) <sup>+</sup> | 199.05               |
| 310.1870 |           |        | 2368973   |                      |                    |                      |

--- End Of Report ---

**Oligomer 3: #bdrw**

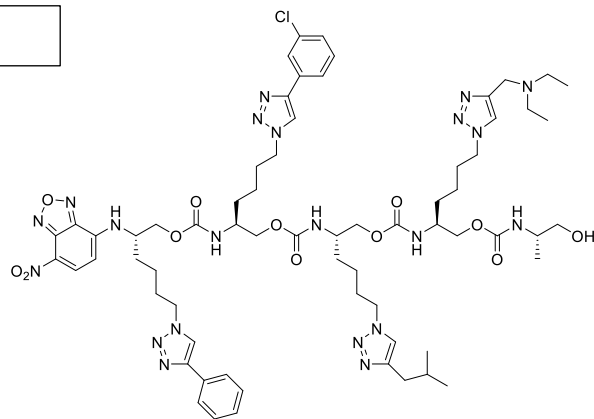

Exact Mass: 1405.69

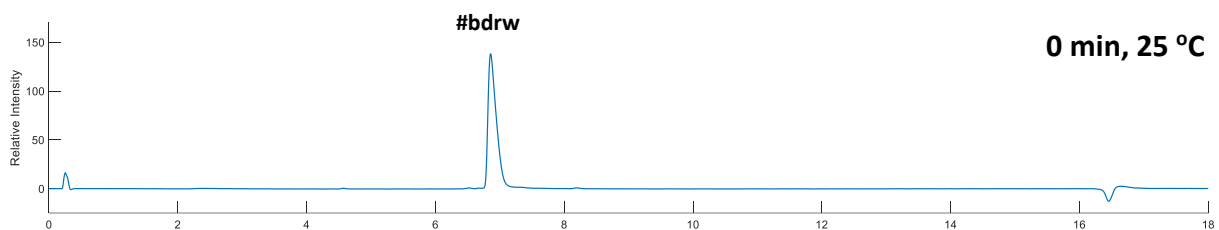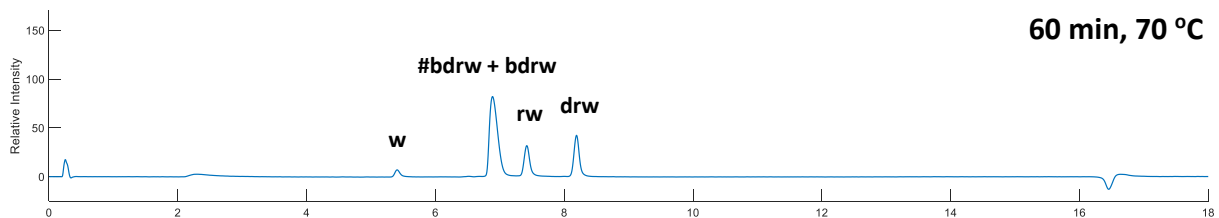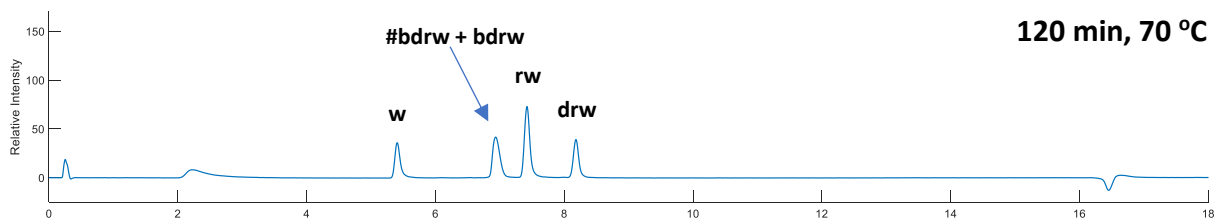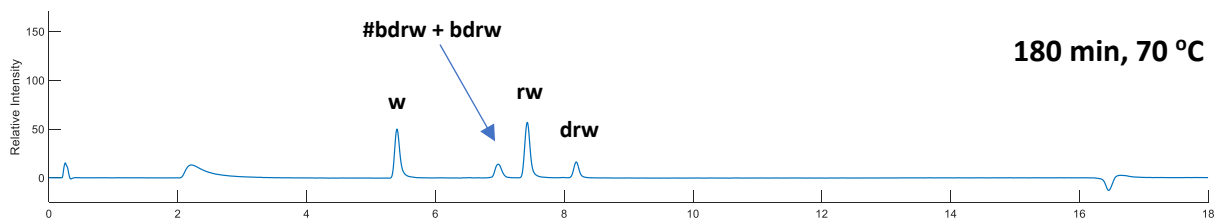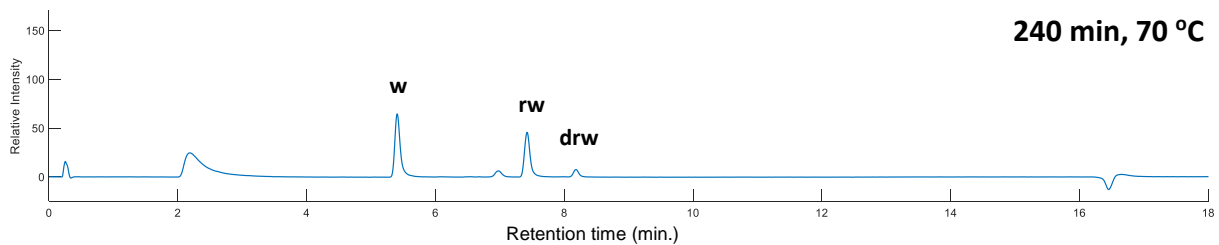

After 120 minutes of sequencing, all the following molecules are observed in the solution and analyzed via High-Res MS.

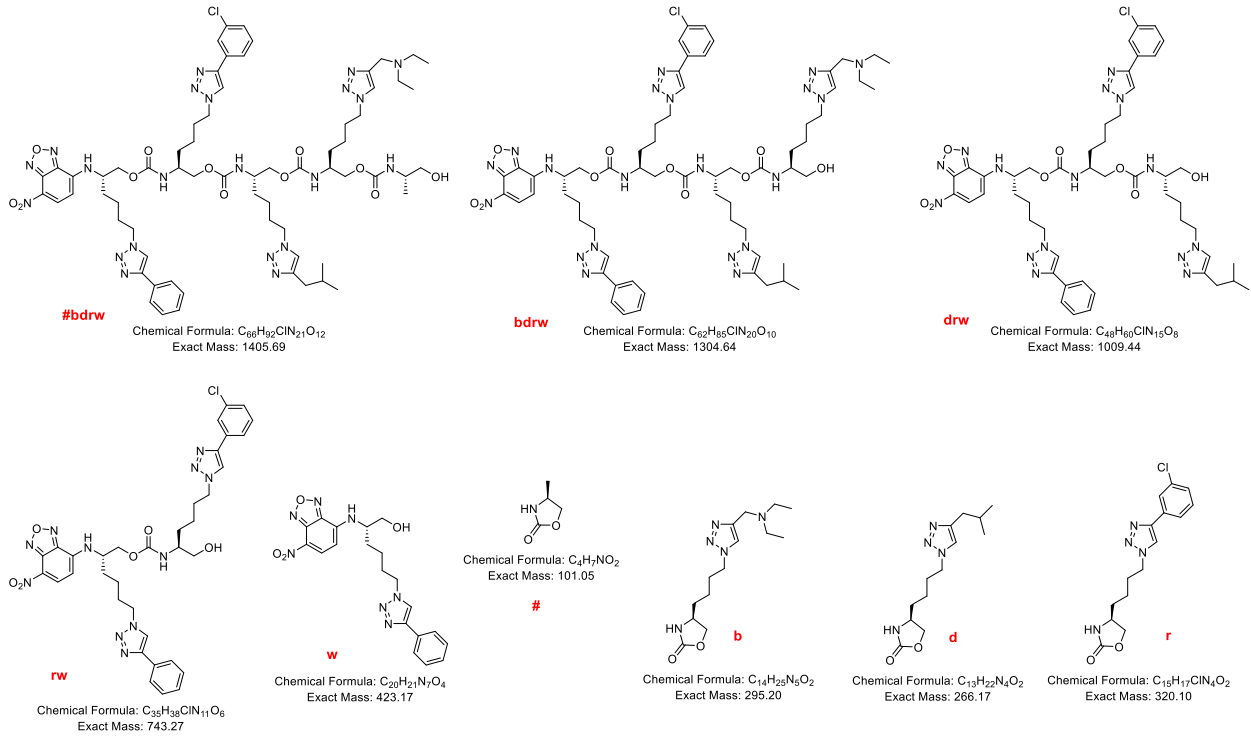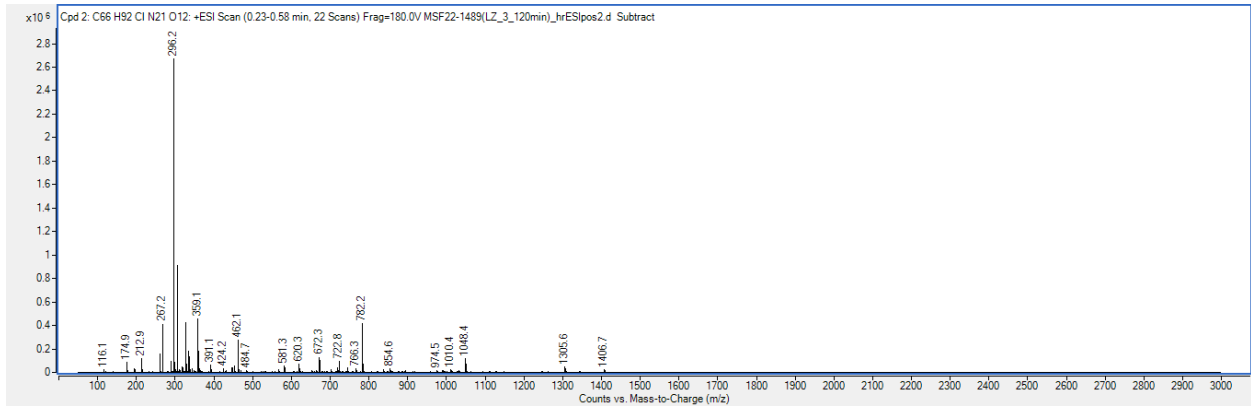

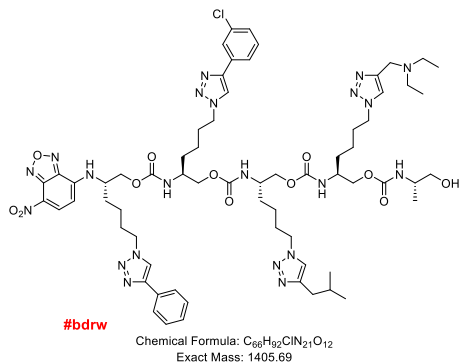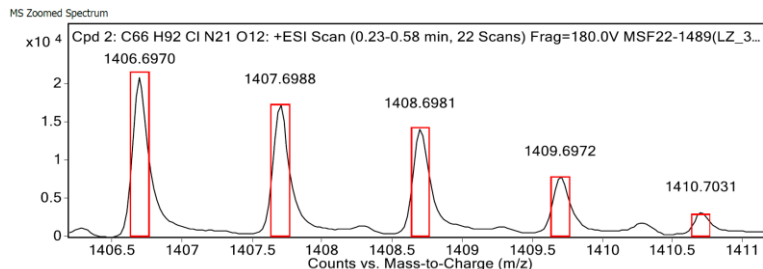

MS Spectrum Peak List

| Obs. m/z  | Calc. m/z | Charge | Abundance | Formula        | Ion Species | Tgt Mass Error (ppm) |
|-----------|-----------|--------|-----------|----------------|-------------|----------------------|
| 296.2078  |           |        | 2679292   |                |             |                      |
| 1406.6970 | 1406.6996 | 1      | 20946     | C66H92ClN21O12 | (M+H)+      | 1.85                 |
| 1407.6988 | 1407.7024 | 1      | 17367     | C66H92ClN21O12 | (M+H)+      | 2.51                 |
| 1408.6981 | 1408.7010 | 1      | 14207     | C66H92ClN21O12 | (M+H)+      | 2.03                 |
| 1409.6972 | 1409.7018 | 1      | 7920      | C66H92ClN21O12 | (M+H)+      | 3.25                 |
| 1410.7031 | 1410.7036 | 1      | 3249      | C66H92ClN21O12 | (M+H)+      | 0.34                 |

--- End Of Report ---

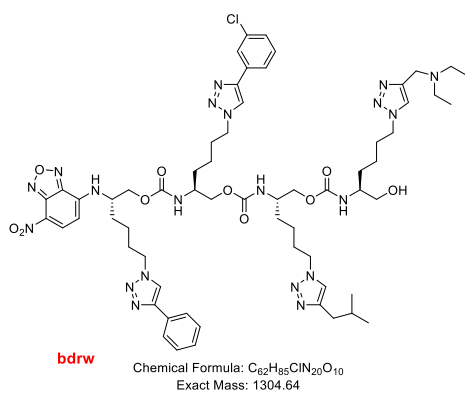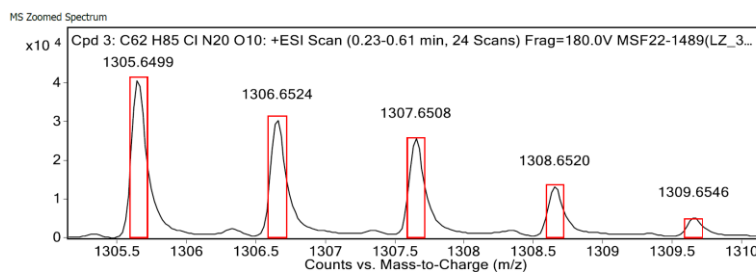

MS Spectrum Peak List

| Obs. m/z  | Calc. m/z | Charge | Abundance | Formula        | Ion Species | Tgt Mass Error (ppm) |
|-----------|-----------|--------|-----------|----------------|-------------|----------------------|
| 296.2079  |           |        | 2522124   |                |             |                      |
| 1305.6499 | 1305.6519 | 1      | 41104     | C62H85ClN20O10 | (M+H)+      | 1.49                 |
| 1306.6524 | 1306.6547 | 1      | 30654     | C62H85ClN20O10 | (M+H)+      | 1.74                 |
| 1307.6508 | 1307.6530 | 1      | 25815     | C62H85ClN20O10 | (M+H)+      | 1.72                 |
| 1308.6520 | 1308.6539 | 1      | 13524     | C62H85ClN20O10 | (M+H)+      | 1.46                 |
| 1309.6546 | 1309.6557 | 1      | 5413      | C62H85ClN20O10 | (M+H)+      | 0.89                 |
| 1310.6685 | 1310.6579 | 1      | 1761      | C62H85ClN20O10 | (M+H)+      | -8.07                |

--- End Of Report ---

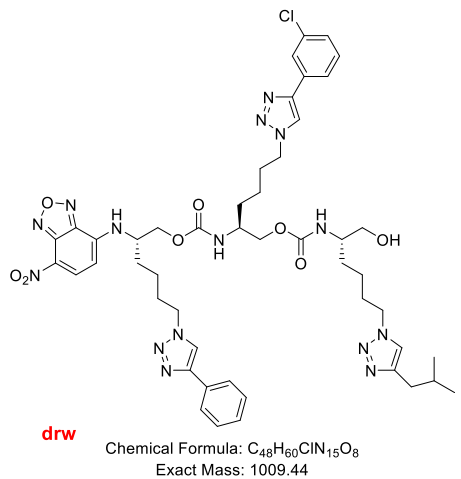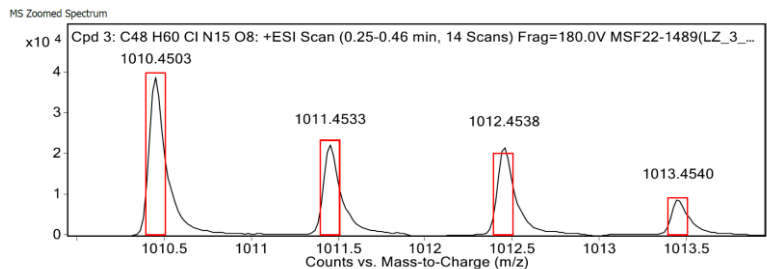

MS Spectrum Peak List

| Obs. m/z  | Calc. m/z | Charge | Abundance | Formula       | Ion Species | Tgt Mass Error (ppm) |
|-----------|-----------|--------|-----------|---------------|-------------|----------------------|
| 296.2081  |           |        | 1284984   |               |             |                      |
| 1010.4503 | 1010.4511 | 1      | 38940     | C48H60ClN15O8 | (M+H)+      | 0.73                 |
| 1011.4533 | 1011.4539 | 1      | 22411     | C48H60ClN15O8 | (M+H)+      | 0.51                 |
| 1012.4538 | 1012.4512 | 1      | 21849     | C48H60ClN15O8 | (M+H)+      | -2.62                |
| 1013.4540 | 1013.4524 | 1      | 8944      | C48H60ClN15O8 | (M+H)+      | -1.57                |

--- End Of Report ---



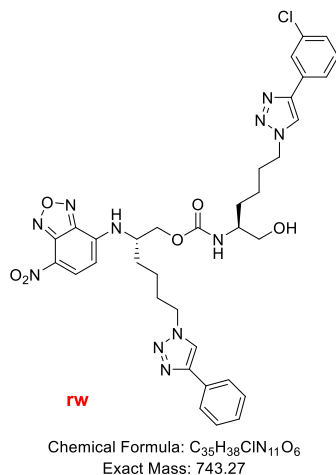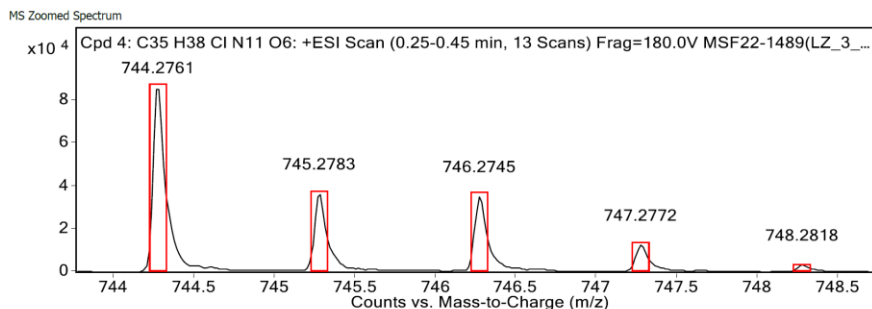

MS Spectrum Peak List

| Obs. m/z | Calc. m/z | Charge | Abundance | Formula                   | Ion Species        | Tgt Mass Error (ppm) |
|----------|-----------|--------|-----------|---------------------------|--------------------|----------------------|
| 296.2081 |           |        | 1166541   |                           |                    |                      |
| 744.2761 | 744.2768  | 1      | 87262     | $C_{35}H_{38}ClN_{11}O_6$ | (M+H) <sup>+</sup> | 0.91                 |
| 745.2783 | 745.2796  | 1      | 36653     | $C_{35}H_{38}ClN_{11}O_6$ | (M+H) <sup>+</sup> | 1.68                 |
| 746.2745 | 746.2758  | 1      | 35366     | $C_{35}H_{38}ClN_{11}O_6$ | (M+H) <sup>+</sup> | 1.79                 |
| 747.2772 | 747.2775  | 1      | 12712     | $C_{35}H_{38}ClN_{11}O_6$ | (M+H) <sup>+</sup> | 0.43                 |
| 748.2818 | 748.2798  | 1      | 3413      | $C_{35}H_{38}ClN_{11}O_6$ | (M+H) <sup>+</sup> | -2.74                |
| 749.2948 | 749.2821  | 1      | 804       | $C_{35}H_{38}ClN_{11}O_6$ | (M+H) <sup>+</sup> | -16.85               |

--- End Of Report ---

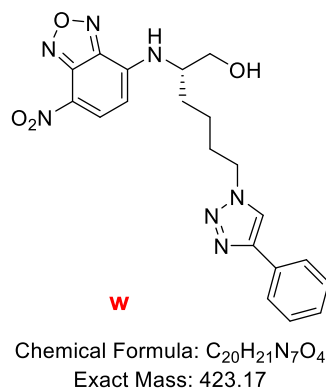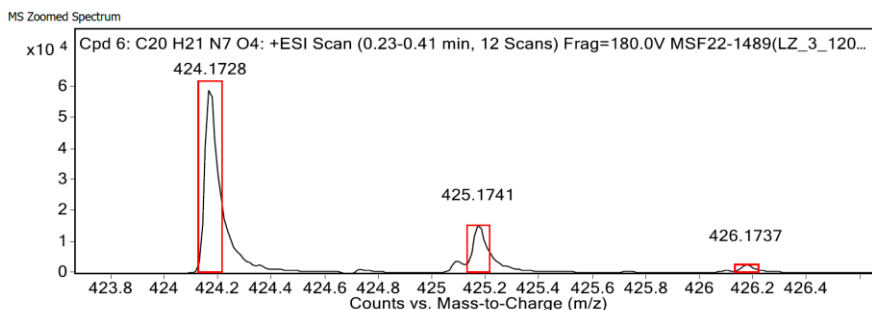

MS Spectrum Peak List

| Obs. m/z | Calc. m/z | Charge | Abundance | Formula              | Ion Species        | Tgt Mass Error (ppm) |
|----------|-----------|--------|-----------|----------------------|--------------------|----------------------|
| 296.2077 |           |        | 2624516   |                      |                    |                      |
| 424.1728 | 424.1728  | 1      | 60499     | $C_{20}H_{21}N_7O_4$ | (M+H) <sup>+</sup> | -0.02                |
| 425.1741 | 425.1755  | 1      | 15791     | $C_{20}H_{21}N_7O_4$ | (M+H) <sup>+</sup> | 3.29                 |
| 426.1737 | 426.1780  | 1      | 2589      | $C_{20}H_{21}N_7O_4$ | (M+H) <sup>+</sup> | 9.88                 |
| 427.1766 | 427.1803  | 1      | 427       | $C_{20}H_{21}N_7O_4$ | (M+H) <sup>+</sup> | 8.66                 |

--- End Of Report ---

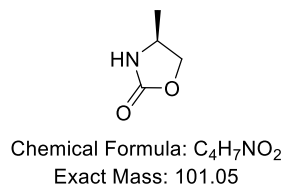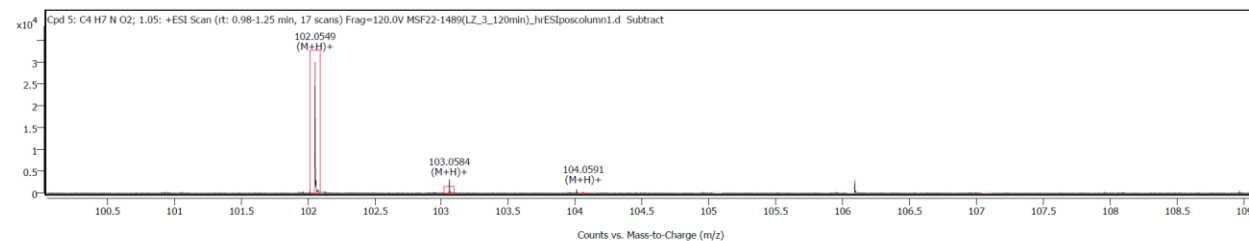

Spectrum Peaks

| Obs. m/z | Calc. m/z | Charge | Abund | Formula      | Ion Species        | Tgt Mass Error (PPM) |
|----------|-----------|--------|-------|--------------|--------------------|----------------------|
| 102.0549 | 102.0550  | 1      | 30805 | $C_4H_7NO_2$ | (M+H) <sup>+</sup> | -0.41                |
| 103.0584 | 103.0579  | 1      | 3115  | $C_4H_7NO_2$ | (M+H) <sup>+</sup> | 5.21                 |
| 104.0591 | 104.0595  | 1      | 236   | $C_4H_7NO_2$ | (M+H) <sup>+</sup> | -3.23                |

MassHunter Qual 10.0  
(End of Report)

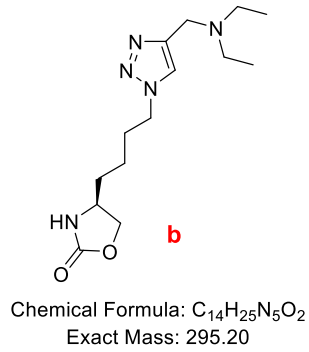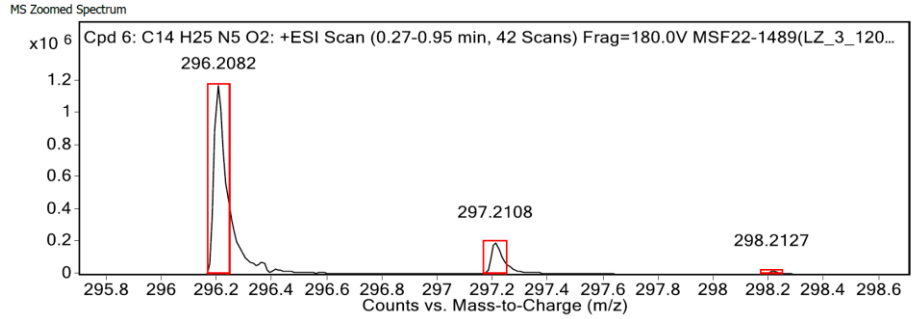

MS Spectrum Peak List

| Obs. m/z | Calc. m/z | Charge | Abundance | Formula                                                       | Ion Species        | Tgt Mass Error (ppm) |
|----------|-----------|--------|-----------|---------------------------------------------------------------|--------------------|----------------------|
| 296.2082 | 296.2081  | 1      | 1178381   | C <sub>14</sub> H <sub>25</sub> N <sub>5</sub> O <sub>2</sub> | (M+H) <sup>+</sup> | -0.29                |
| 297.2108 | 297.2108  | 1      | 197531    | C <sub>14</sub> H <sub>25</sub> N <sub>5</sub> O <sub>2</sub> | (M+H) <sup>+</sup> | 0.1                  |
| 298.2127 | 298.2133  | 1      | 20996     | C <sub>14</sub> H <sub>25</sub> N <sub>5</sub> O <sub>2</sub> | (M+H) <sup>+</sup> | 1.84                 |

--- End Of Report ---

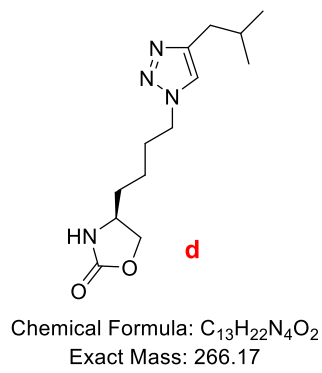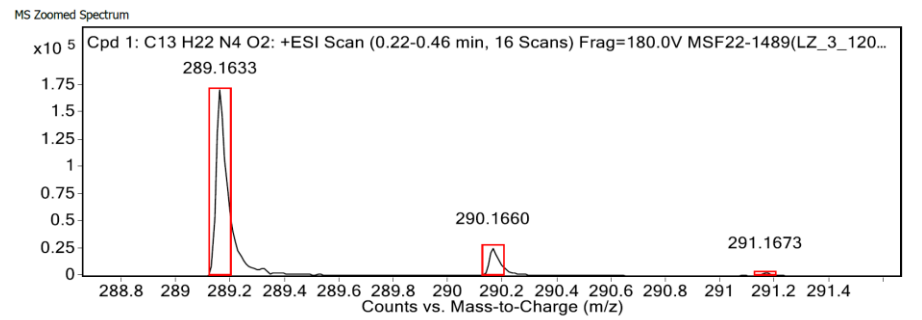

MS Spectrum Peak List

| Obs. m/z | Calc. m/z | Charge | Abundance | Formula                                                       | Ion Species         | Tgt Mass Error (ppm) |
|----------|-----------|--------|-----------|---------------------------------------------------------------|---------------------|----------------------|
| 289.1633 | 289.1635  | 1      | 171372    | C <sub>13</sub> H <sub>22</sub> N <sub>4</sub> O <sub>2</sub> | (M+Na) <sup>+</sup> | 0.83                 |
| 290.1660 | 290.1663  | 1      | 25126     | C <sub>13</sub> H <sub>22</sub> N <sub>4</sub> O <sub>2</sub> | (M+Na) <sup>+</sup> | 1                    |
| 291.1673 | 291.1687  | 1      | 2814      | C <sub>13</sub> H <sub>22</sub> N <sub>4</sub> O <sub>2</sub> | (M+Na) <sup>+</sup> | 4.88                 |
| 292.1706 | 292.1711  | 1      | 307       | C <sub>13</sub> H <sub>22</sub> N <sub>4</sub> O <sub>2</sub> | (M+Na) <sup>+</sup> | 1.98                 |
| 296.2081 |           |        | 1067585   |                                                               |                     |                      |

--- End Of Report ---

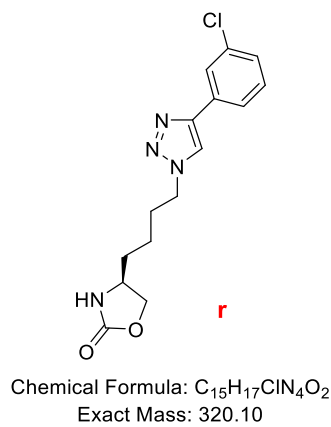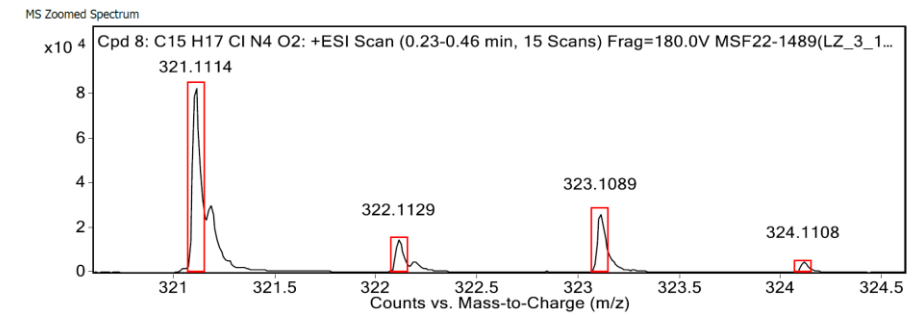

MS Spectrum Peak List

| Obs. m/z | Calc. m/z | Charge | Abundance | Formula                                                         | Ion Species        | Tgt Mass Error (ppm) |
|----------|-----------|--------|-----------|-----------------------------------------------------------------|--------------------|----------------------|
| 296.2081 |           |        | 1101688   |                                                                 |                    |                      |
| 321.1114 | 321.1113  | 1      | 83930     | C <sub>15</sub> H <sub>17</sub> ClN <sub>4</sub> O <sub>2</sub> | (M+H) <sup>+</sup> | -0.3                 |
| 322.1129 | 322.1142  | 1      | 14904     | C <sub>15</sub> H <sub>17</sub> ClN <sub>4</sub> O <sub>2</sub> | (M+H) <sup>+</sup> | 3.77                 |
| 323.1089 | 323.1088  | 1      | 26472     | C <sub>15</sub> H <sub>17</sub> ClN <sub>4</sub> O <sub>2</sub> | (M+H) <sup>+</sup> | -0.44                |
| 324.1108 | 324.1114  | 1      | 4739      | C <sub>15</sub> H <sub>17</sub> ClN <sub>4</sub> O <sub>2</sub> | (M+H) <sup>+</sup> | 1.92                 |
| 325.1073 | 325.1139  | 1      | 3819      | C <sub>15</sub> H <sub>17</sub> ClN <sub>4</sub> O <sub>2</sub> | (M+H) <sup>+</sup> | 20.22                |
| 326.1111 | 326.1163  | 1      | 815       | C <sub>15</sub> H <sub>17</sub> ClN <sub>4</sub> O <sub>2</sub> | (M+H) <sup>+</sup> | 15.7                 |

--- End Of Report ---

**Oligomer 4: #7fd2**

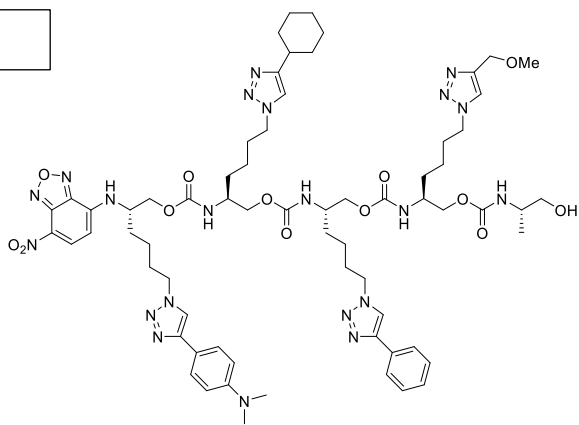

Exact Mass: 1399.73

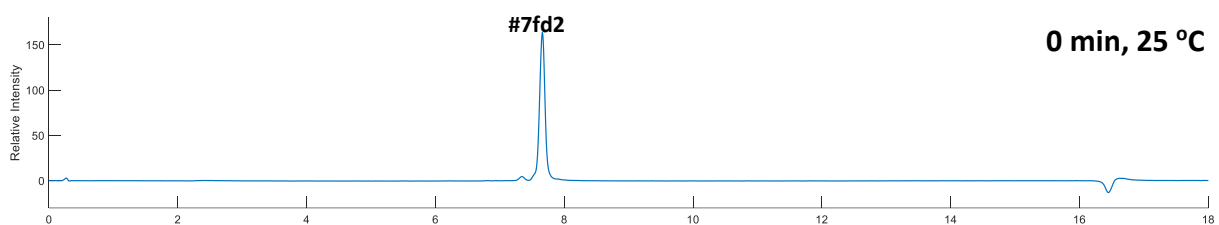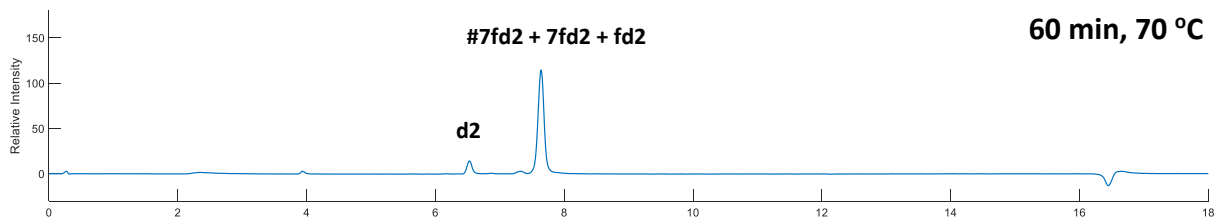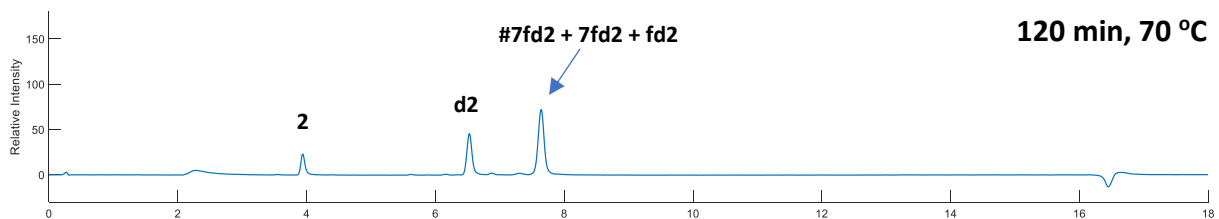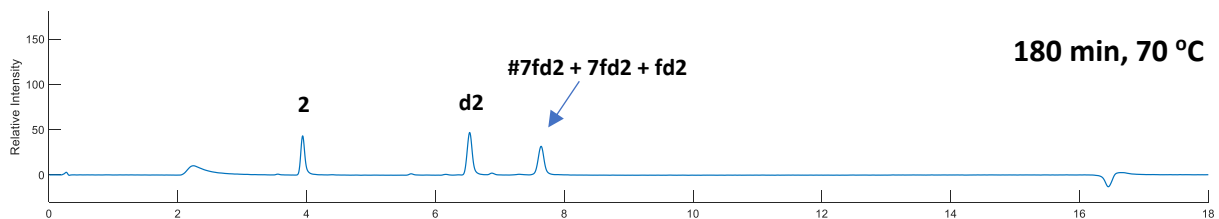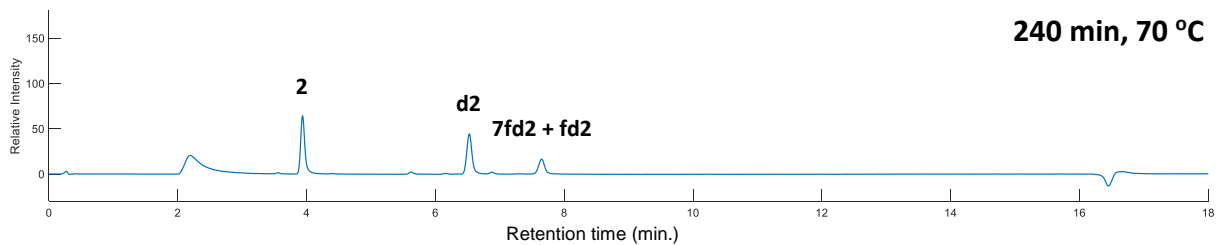

After 120 minutes of sequencing, all the following molecules are observed in the solution and analyzed via High-Res MS.

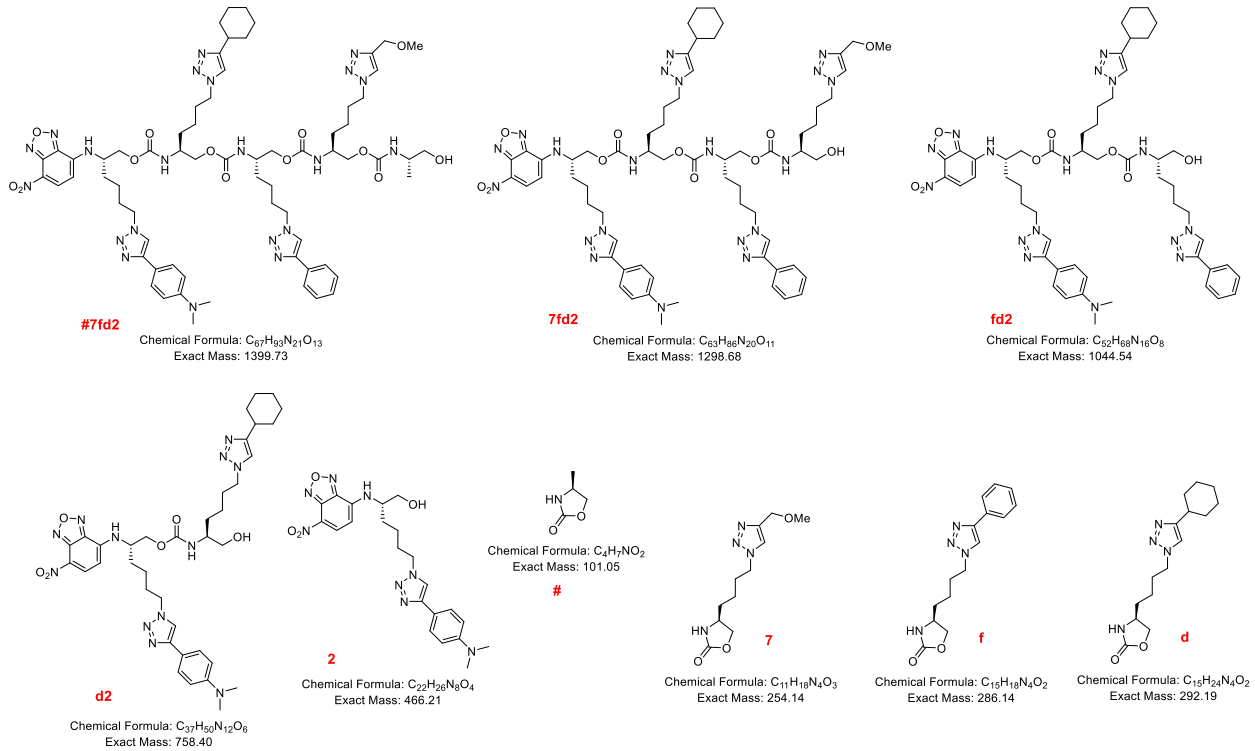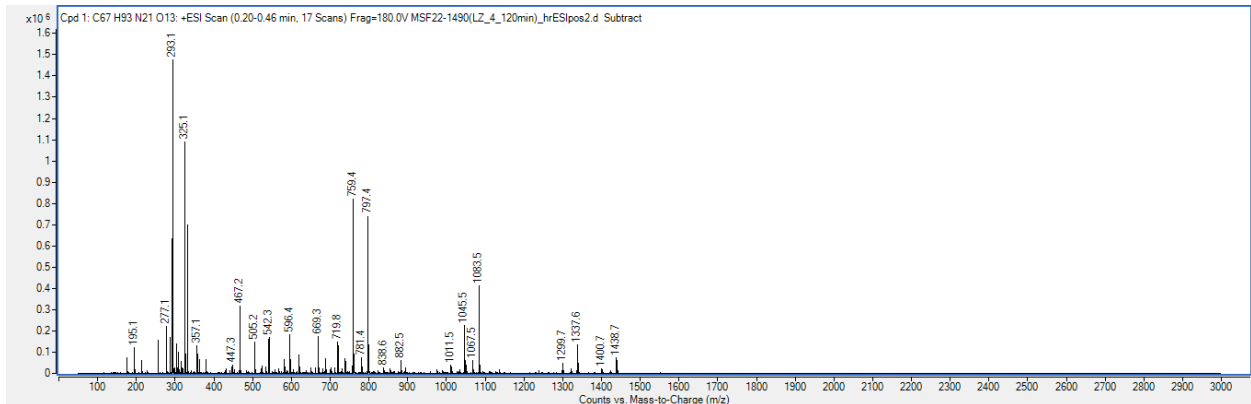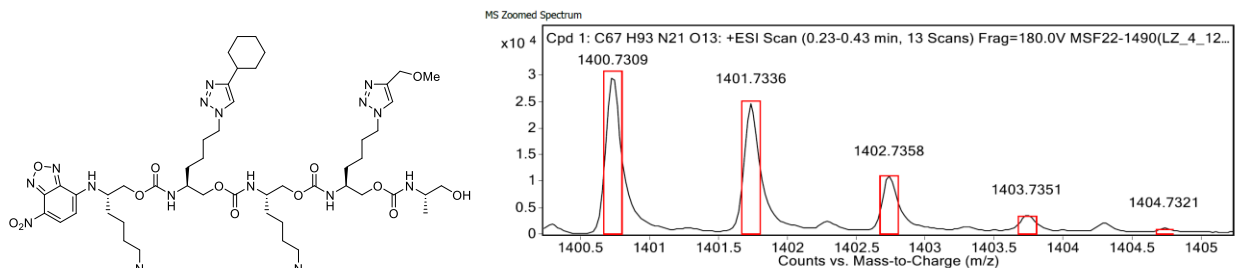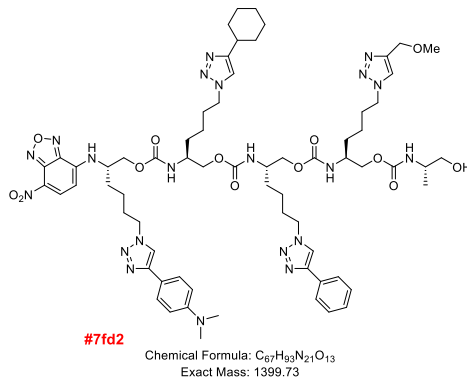

| MS Spectrum Peak List |           |        |           |                            |                    |                      |
|-----------------------|-----------|--------|-----------|----------------------------|--------------------|----------------------|
| Obs. m/z              | Calc. m/z | Charge | Abundance | Formula                    | Ion Species        | Tgt Mass Error (ppm) |
| 293.1010              |           |        | 1779023   |                            |                    |                      |
| 1400.7309             | 1400.7334 | 1      | 30107     | $C_{67}H_{93}N_{21}O_{13}$ | (M+H) <sup>+</sup> | 1.8                  |
| 1401.7336             | 1401.7363 | 1      | 24759     | $C_{67}H_{93}N_{21}O_{13}$ | (M+H) <sup>+</sup> | 1.87                 |
| 1402.7358             | 1402.7389 | 1      | 11096     | $C_{67}H_{93}N_{21}O_{13}$ | (M+H) <sup>+</sup> | 2.24                 |
| 1403.7351             | 1403.7416 | 1      | 3793      | $C_{67}H_{93}N_{21}O_{13}$ | (M+H) <sup>+</sup> | 4.61                 |
| 1404.7321             | 1404.7441 | 1      | 1357      | $C_{67}H_{93}N_{21}O_{13}$ | (M+H) <sup>+</sup> | 8.58                 |

--- End Of Report ---

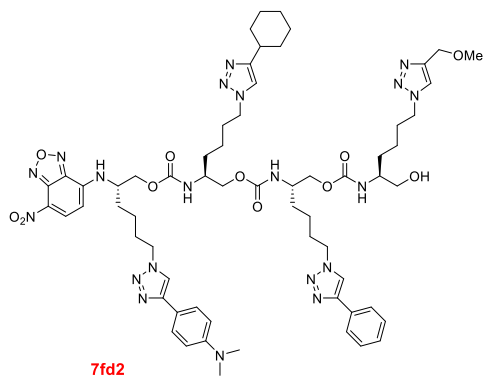

Chemical Formula: C<sub>63</sub>H<sub>86</sub>N<sub>20</sub>O<sub>11</sub>  
Exact Mass: 1298.68

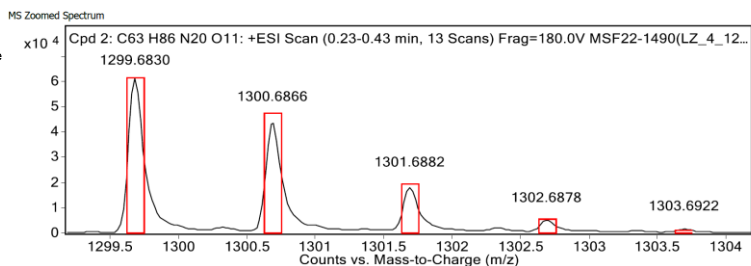

| Obs. m/z  | Calc. m/z | Charge | Abundance | Formula                                                         | Ion Species        | Tgt Mass Error (ppm) |
|-----------|-----------|--------|-----------|-----------------------------------------------------------------|--------------------|----------------------|
| 293.1010  |           |        | 1779991   |                                                                 |                    |                      |
| 1299.6830 | 1299.6858 | 1      | 61539     | C <sub>63</sub> H <sub>86</sub> N <sub>20</sub> O <sub>11</sub> | (M+H) <sup>+</sup> | 2.1                  |
| 1300.6866 | 1300.6886 | 1      | 44497     | C <sub>63</sub> H <sub>86</sub> N <sub>20</sub> O <sub>11</sub> | (M+H) <sup>+</sup> | 1.53                 |
| 1301.6882 | 1301.6913 | 1      | 18568     | C <sub>63</sub> H <sub>86</sub> N <sub>20</sub> O <sub>11</sub> | (M+H) <sup>+</sup> | 2.34                 |
| 1302.6878 | 1302.6939 | 1      | 4546      | C <sub>63</sub> H <sub>86</sub> N <sub>20</sub> O <sub>11</sub> | (M+H) <sup>+</sup> | 4.67                 |
| 1303.6922 | 1303.6964 | 1      | 1229      | C <sub>63</sub> H <sub>86</sub> N <sub>20</sub> O <sub>11</sub> | (M+H) <sup>+</sup> | 3.26                 |
| 1304.6768 | 1304.6990 | 1      | 248       | C <sub>63</sub> H <sub>86</sub> N <sub>20</sub> O <sub>11</sub> | (M+H) <sup>+</sup> | 17                   |

--- End Of Report ---

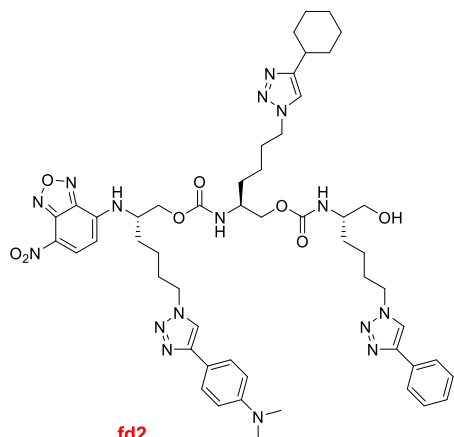

Chemical Formula: C<sub>52</sub>H<sub>68</sub>N<sub>16</sub>O<sub>8</sub>  
Exact Mass: 1044.54

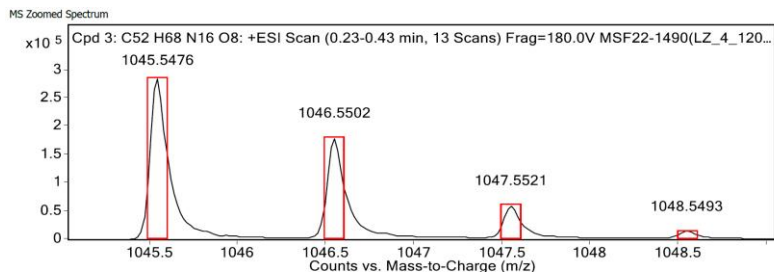

| Obs. m/z  | Calc. m/z | Charge | Abundance | Formula                                                        | Ion Species        | Tgt Mass Error (ppm) |
|-----------|-----------|--------|-----------|----------------------------------------------------------------|--------------------|----------------------|
| 293.1010  |           |        | 1777930   |                                                                |                    |                      |
| 1045.5476 | 1045.5479 | 1      | 285185    | C <sub>52</sub> H <sub>68</sub> N <sub>16</sub> O <sub>8</sub> | (M+H) <sup>+</sup> | 0.22                 |
| 1046.5502 | 1046.5507 | 1      | 178740    | C <sub>52</sub> H <sub>68</sub> N <sub>16</sub> O <sub>8</sub> | (M+H) <sup>+</sup> | 0.52                 |
| 1047.5521 | 1047.5534 | 1      | 58956     | C <sub>52</sub> H <sub>68</sub> N <sub>16</sub> O <sub>8</sub> | (M+H) <sup>+</sup> | 1.27                 |
| 1048.5493 | 1048.5560 | 1      | 13187     | C <sub>52</sub> H <sub>68</sub> N <sub>16</sub> O <sub>8</sub> | (M+H) <sup>+</sup> | 6.43                 |

--- End Of Report ---

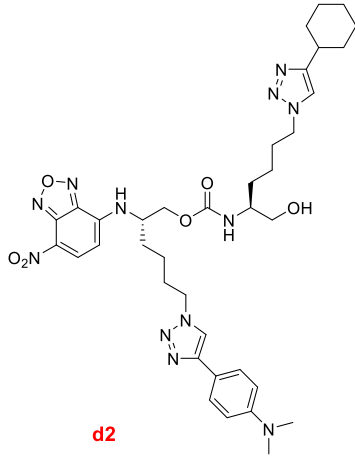

**d2**  
 Chemical Formula: C<sub>37</sub>H<sub>50</sub>N<sub>12</sub>O<sub>6</sub>  
 Exact Mass: 758.40

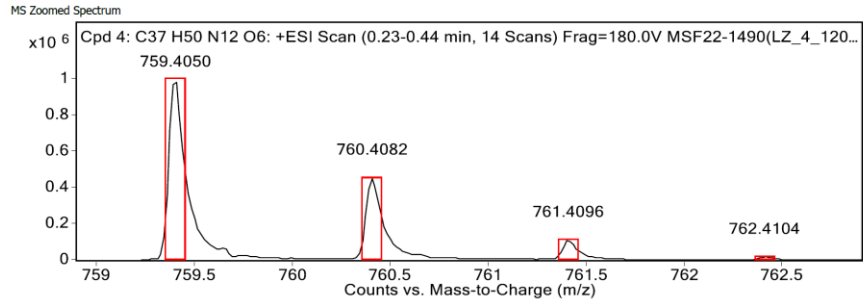

| Obs. m/z | Calc. m/z | Charge | Abundance | Formula                                                        | Ion Species        | Tgt Mass Error (ppm) |
|----------|-----------|--------|-----------|----------------------------------------------------------------|--------------------|----------------------|
| 293.1010 |           |        | 1773373   |                                                                |                    |                      |
| 759.4050 | 759.4049  | 1      | 1002280   | C <sub>37</sub> H <sub>50</sub> N <sub>12</sub> O <sub>6</sub> | (M+H) <sup>+</sup> | -0.13                |
| 760.4082 | 760.4077  | 1      | 455872    | C <sub>37</sub> H <sub>50</sub> N <sub>12</sub> O <sub>6</sub> | (M+H) <sup>+</sup> | -0.73                |
| 761.4096 | 761.4103  | 1      | 111402    | C <sub>37</sub> H <sub>50</sub> N <sub>12</sub> O <sub>6</sub> | (M+H) <sup>+</sup> | 0.92                 |
| 762.4104 | 762.4129  | 1      | 17271     | C <sub>37</sub> H <sub>50</sub> N <sub>12</sub> O <sub>6</sub> | (M+H) <sup>+</sup> | 3.16                 |
| 763.4086 | 763.4153  | 1      | 2466      | C <sub>37</sub> H <sub>50</sub> N <sub>12</sub> O <sub>6</sub> | (M+H) <sup>+</sup> | 8.86                 |

--- End Of Report ---

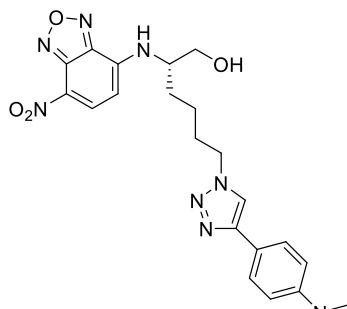

**2**  
 Chemical Formula: C<sub>22</sub>H<sub>26</sub>N<sub>8</sub>O<sub>4</sub>  
 Exact Mass: 466.21

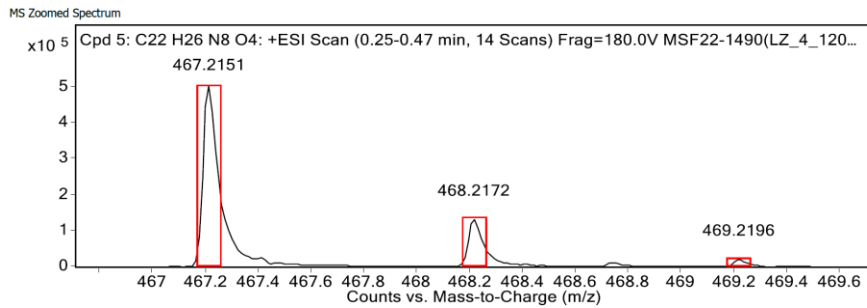

| Obs. m/z | Calc. m/z | Charge | Abundance | Formula                                                       | Ion Species        | Tgt Mass Error (ppm) |
|----------|-----------|--------|-----------|---------------------------------------------------------------|--------------------|----------------------|
| 467.2151 | 467.2150  | 1      | 503378    | C <sub>22</sub> H <sub>26</sub> N <sub>8</sub> O <sub>4</sub> | (M+H) <sup>+</sup> | -0.35                |
| 468.2172 | 468.2177  | 1      | 131744    | C <sub>22</sub> H <sub>26</sub> N <sub>8</sub> O <sub>4</sub> | (M+H) <sup>+</sup> | 1.04                 |
| 469.2196 | 469.2202  | 1      | 20692     | C <sub>22</sub> H <sub>26</sub> N <sub>8</sub> O <sub>4</sub> | (M+H) <sup>+</sup> | 1.17                 |
| 470.2523 | 470.2226  | 1      | 2501      | C <sub>22</sub> H <sub>26</sub> N <sub>8</sub> O <sub>4</sub> | (M+H) <sup>+</sup> | -63.31               |
| 471.2134 | 471.2249  | 1      | 569       | C <sub>22</sub> H <sub>26</sub> N <sub>8</sub> O <sub>4</sub> | (M+H) <sup>+</sup> | 24.42                |
| 759.4044 |           |        | 1429557   |                                                               |                    |                      |

--- End Of Report ---

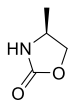

**#**  
 Chemical Formula: C<sub>4</sub>H<sub>7</sub>NO<sub>2</sub>  
 Exact Mass: 101.05

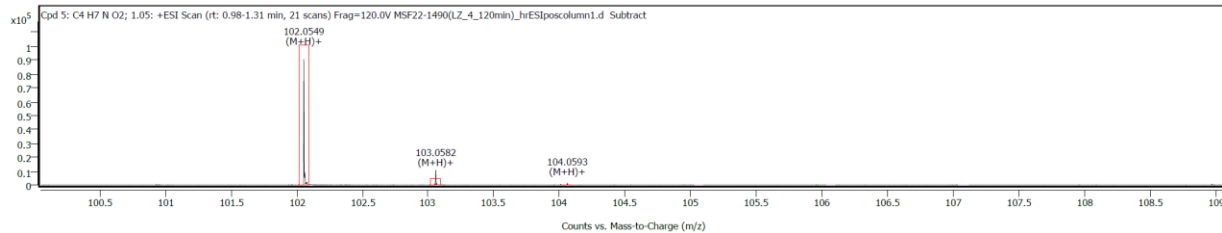

| Obs. m/z | Calc. m/z | Charge | Abund | Formula                                       | Ion Species        | Tgt Mass Error (PPM) |
|----------|-----------|--------|-------|-----------------------------------------------|--------------------|----------------------|
| 102.0549 | 102.0550  | 1      | 94820 | C <sub>4</sub> H <sub>7</sub> NO <sub>2</sub> | (M+H) <sup>+</sup> | -0.58                |
| 103.0582 | 103.0579  | 1      | 10733 | C <sub>4</sub> H <sub>7</sub> NO <sub>2</sub> | (M+H) <sup>+</sup> | 2.96                 |
| 104.0593 | 104.0595  | 1      | 1258  | C <sub>4</sub> H <sub>7</sub> NO <sub>2</sub> | (M+H) <sup>+</sup> | -1.74                |

MassHunter Qual 10.0  
 (End of Report)

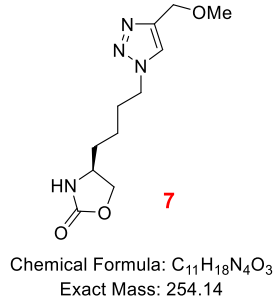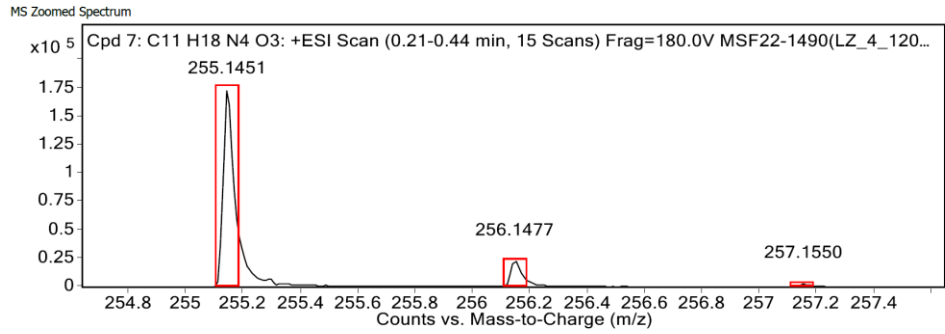

MS Spectrum Peak List

| Obs. m/z | Calc. m/z | Charge | Abundance | Formula                                                       | Ion Species        | Tgt Mass Error (ppm) |
|----------|-----------|--------|-----------|---------------------------------------------------------------|--------------------|----------------------|
| 255.1451 | 255.1452  | 1      | 176362    | C <sub>11</sub> H <sub>18</sub> N <sub>4</sub> O <sub>3</sub> | (M+H) <sup>+</sup> | 0.35                 |
| 256.1477 | 256.1479  | 1      | 22645     | C <sub>11</sub> H <sub>18</sub> N <sub>4</sub> O <sub>3</sub> | (M+H) <sup>+</sup> | 0.96                 |
| 257.1550 | 257.1501  | 1      | 2804      | C <sub>11</sub> H <sub>18</sub> N <sub>4</sub> O <sub>3</sub> | (M+H) <sup>+</sup> | -19.13               |
| 258.1715 | 258.1524  | 1      | 421       | C <sub>11</sub> H <sub>18</sub> N <sub>4</sub> O <sub>3</sub> | (M+H) <sup>+</sup> | -73.93               |
| 293.1010 |           |        | 1625527   |                                                               |                    |                      |

--- End Of Report ---

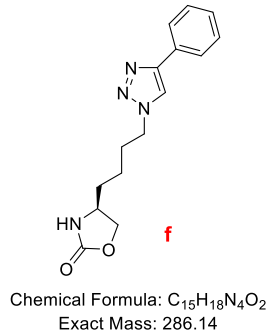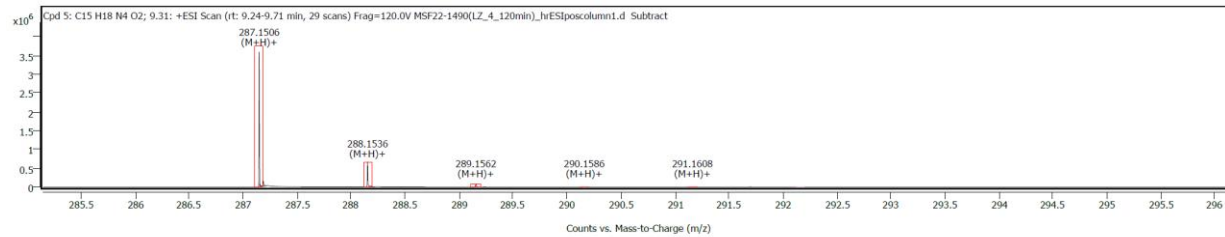

Spectrum Peaks

| Obs. m/z | Calc. m/z | Charge | Abund   | Formula                                                       | Ion Species        | Tgt Mass Error (PPM) |
|----------|-----------|--------|---------|---------------------------------------------------------------|--------------------|----------------------|
| 287.1506 | 287.1503  | 1      | 3714401 | C <sub>15</sub> H <sub>18</sub> N <sub>4</sub> O <sub>2</sub> | (M+H) <sup>+</sup> | 1.17                 |
| 288.1536 | 288.1531  | 1      | 685425  | C <sub>15</sub> H <sub>18</sub> N <sub>4</sub> O <sub>2</sub> | (M+H) <sup>+</sup> | 1.75                 |
| 289.1562 | 289.1557  | 1      | 75108   | C <sub>15</sub> H <sub>18</sub> N <sub>4</sub> O <sub>2</sub> | (M+H) <sup>+</sup> | 1.72                 |
| 290.1586 | 290.1581  | 1      | 5989    | C <sub>15</sub> H <sub>18</sub> N <sub>4</sub> O <sub>2</sub> | (M+H) <sup>+</sup> | 1.58                 |
| 291.1608 | 291.1606  | 1      | 445     | C <sub>15</sub> H <sub>18</sub> N <sub>4</sub> O <sub>2</sub> | (M+H) <sup>+</sup> | 0.62                 |

MassHunter Qual 10.0  
(End of Report)

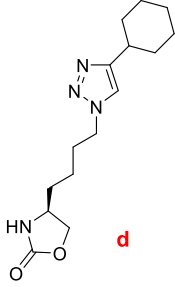

**d**

Chemical Formula: C<sub>15</sub>H<sub>24</sub>N<sub>4</sub>O<sub>2</sub>  
Exact Mass: 292.19

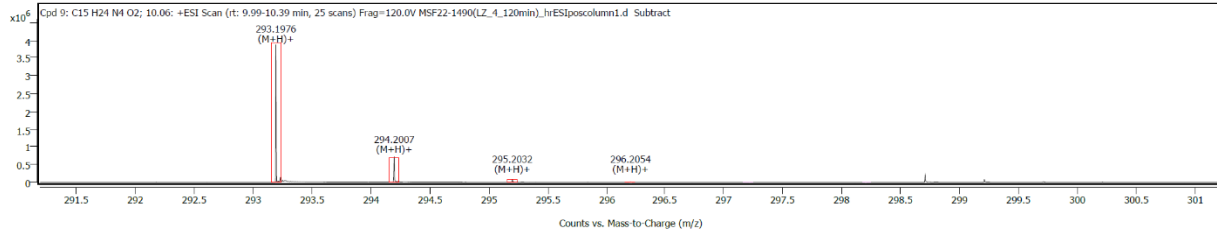

Spectrum Peaks

| Obs. m/z | Calc. m/z | Charge | Abund   | Formula                                                       | Ion Species        | Tgt Mass Error (PPM) |
|----------|-----------|--------|---------|---------------------------------------------------------------|--------------------|----------------------|
| 293.1976 | 293.1972  | 1      | 3885574 | C <sub>15</sub> H <sub>24</sub> N <sub>4</sub> O <sub>2</sub> | (M+H) <sup>+</sup> | 1.37                 |
| 294.2007 | 294.2001  | 1      | 729886  | C <sub>15</sub> H <sub>24</sub> N <sub>4</sub> O <sub>2</sub> | (M+H) <sup>+</sup> | 1.97                 |
| 295.2032 | 295.2026  | 1      | 80608   | C <sub>15</sub> H <sub>24</sub> N <sub>4</sub> O <sub>2</sub> | (M+H) <sup>+</sup> | 1.93                 |
| 296.2054 | 296.2051  | 1      | 6756    | C <sub>15</sub> H <sub>24</sub> N <sub>4</sub> O <sub>2</sub> | (M+H) <sup>+</sup> | 1.04                 |

MassHunter Qual 10.0  
(End of Report)

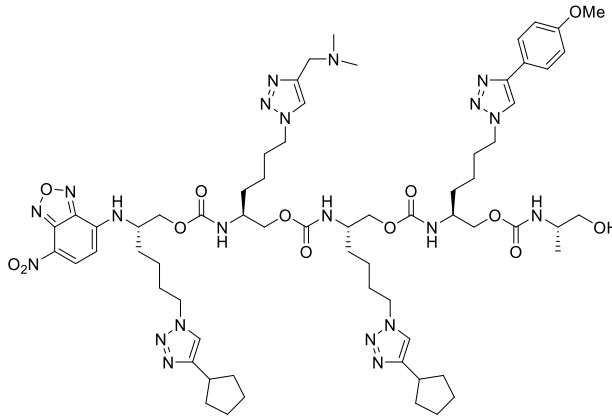

Exact Mass: 1377.74

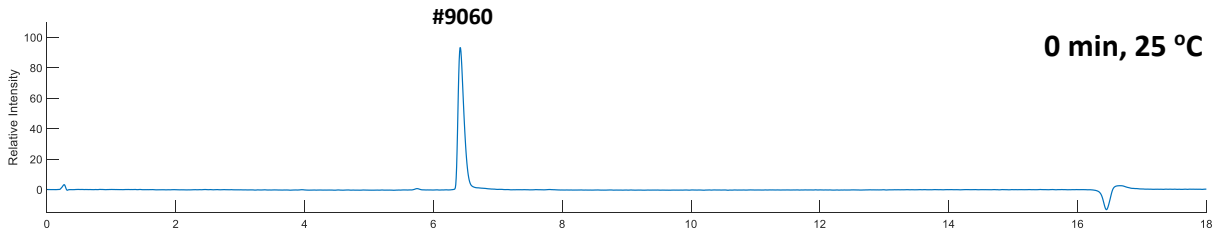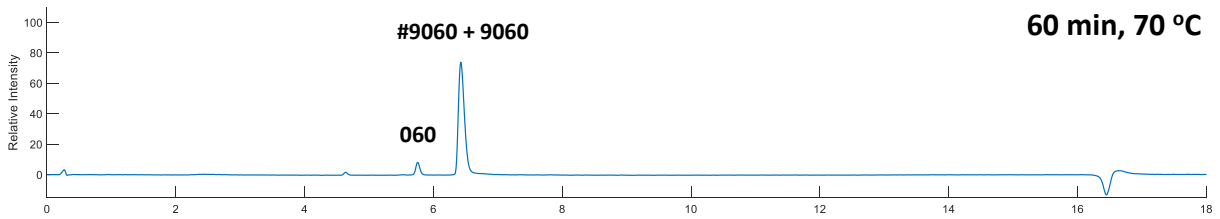



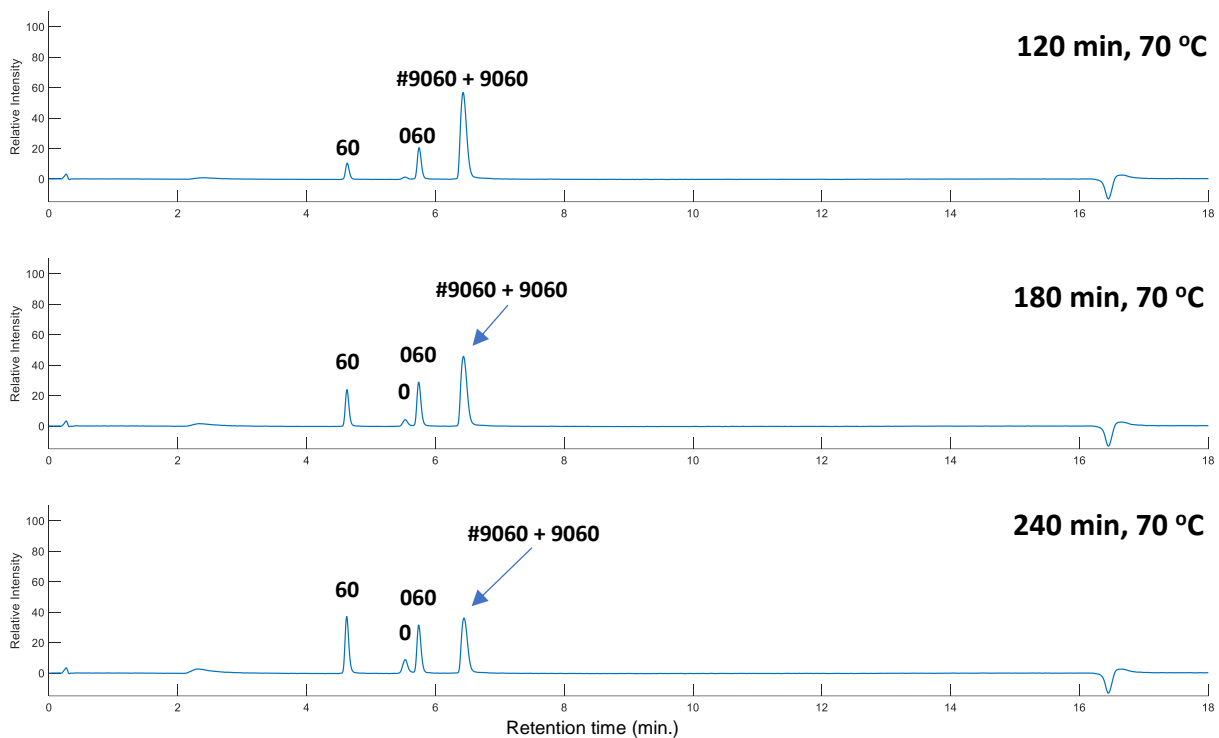

After 120 minutes of sequencing, all the following molecules are observed in the solution and analyzed via High-Res MS.

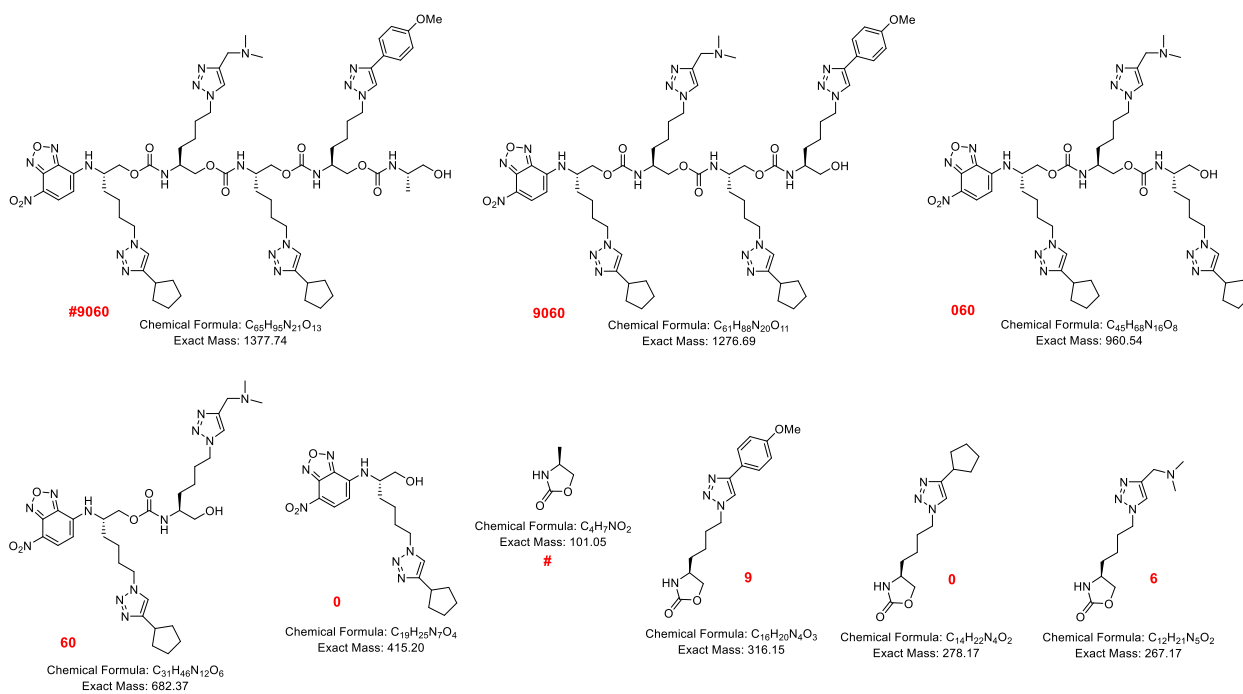

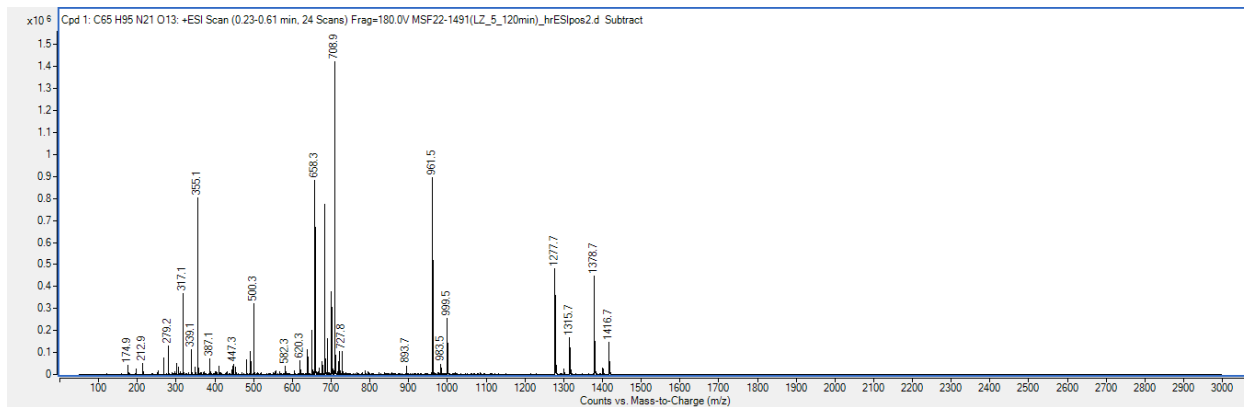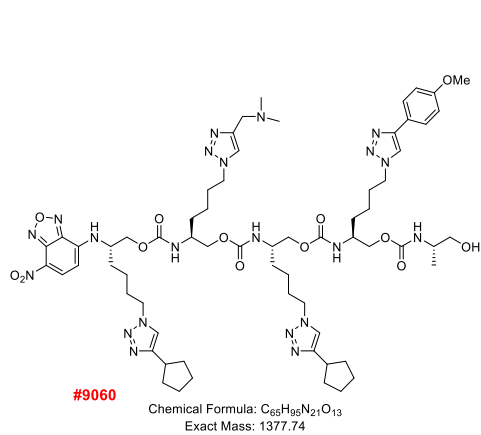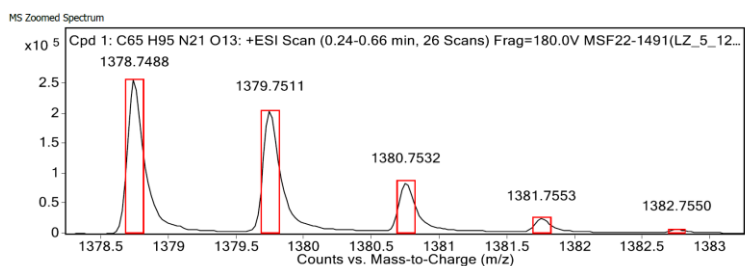

MS Spectrum Peak List

| Obs. m/z  | Calc. m/z | Charge | Abundance | Formula                                                         | Ion Species        | Tgt Mass Error (ppm) |
|-----------|-----------|--------|-----------|-----------------------------------------------------------------|--------------------|----------------------|
| 708.8576  |           |        | 786927    |                                                                 |                    |                      |
| 1378.7488 | 1378.7491 | 1      | 257452    | C <sub>65</sub> H <sub>95</sub> N <sub>21</sub> O <sub>13</sub> | (M+H) <sup>+</sup> | 0.24                 |
| 1379.7511 | 1379.7519 | 1      | 205424    | C <sub>65</sub> H <sub>95</sub> N <sub>21</sub> O <sub>13</sub> | (M+H) <sup>+</sup> | 0.56                 |
| 1380.7532 | 1380.7546 | 1      | 85241     | C <sub>65</sub> H <sub>95</sub> N <sub>21</sub> O <sub>13</sub> | (M+H) <sup>+</sup> | 0.99                 |
| 1381.7553 | 1381.7572 | 1      | 22253     | C <sub>65</sub> H <sub>95</sub> N <sub>21</sub> O <sub>13</sub> | (M+H) <sup>+</sup> | 1.38                 |
| 1382.7550 | 1382.7597 | 1      | 5388      | C <sub>65</sub> H <sub>95</sub> N <sub>21</sub> O <sub>13</sub> | (M+H) <sup>+</sup> | 3.43                 |
| 1383.7472 | 1383.7622 | 1      | 1195      | C <sub>65</sub> H <sub>95</sub> N <sub>21</sub> O <sub>13</sub> | (M+H) <sup>+</sup> | 10.84                |
| 1384.7199 | 1384.7647 | 1      | 391       | C <sub>65</sub> H <sub>95</sub> N <sub>21</sub> O <sub>13</sub> | (M+H) <sup>+</sup> | 32.4                 |

--- End Of Report ---

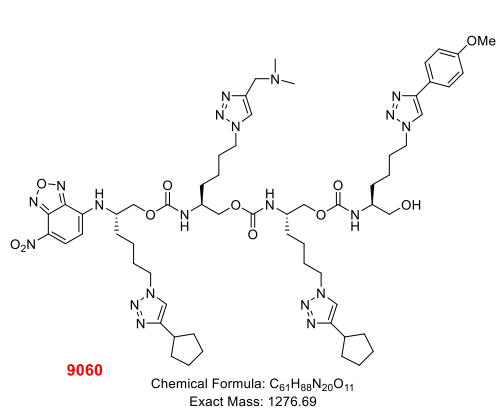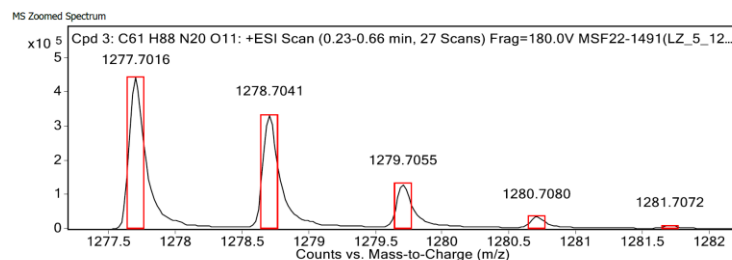

MS Spectrum Peak List

| Obs. m/z  | Calc. m/z | Charge | Abundance | Formula                                                         | Ion Species        | Tgt Mass Error (ppm) |
|-----------|-----------|--------|-----------|-----------------------------------------------------------------|--------------------|----------------------|
| 708.8569  |           |        | 1373255   |                                                                 |                    |                      |
| 1277.7016 | 1277.7014 | 1      | 444067    | C <sub>61</sub> H <sub>88</sub> N <sub>20</sub> O <sub>11</sub> | (M+H) <sup>+</sup> | -0.1                 |
| 1278.7041 | 1278.7042 | 1      | 332958    | C <sub>61</sub> H <sub>88</sub> N <sub>20</sub> O <sub>11</sub> | (M+H) <sup>+</sup> | 0.11                 |
| 1279.7055 | 1279.7069 | 1      | 130646    | C <sub>61</sub> H <sub>88</sub> N <sub>20</sub> O <sub>11</sub> | (M+H) <sup>+</sup> | 1.04                 |
| 1280.7080 | 1280.7095 | 1      | 31737     | C <sub>61</sub> H <sub>88</sub> N <sub>20</sub> O <sub>11</sub> | (M+H) <sup>+</sup> | 1.17                 |
| 1281.7072 | 1281.7120 | 1      | 7262      | C <sub>61</sub> H <sub>88</sub> N <sub>20</sub> O <sub>11</sub> | (M+H) <sup>+</sup> | 3.76                 |
| 1282.7086 | 1282.7145 | 1      | 1469      | C <sub>61</sub> H <sub>88</sub> N <sub>20</sub> O <sub>11</sub> | (M+H) <sup>+</sup> | 4.67                 |

--- End Of Report ---

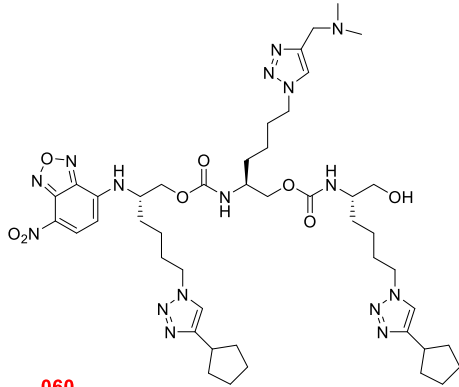

060

Chemical Formula: C<sub>45</sub>H<sub>68</sub>N<sub>16</sub>O<sub>8</sub>  
Exact Mass: 960.54

MS Zoomed Spectrum

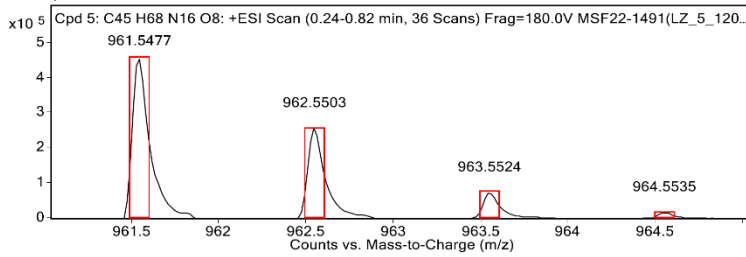

MS Spectrum Peak List

| Obs. m/z | Calc. m/z | Charge | Abundance | Formula                                                        | Ion Species        | Tgt Mass Error (ppm) |
|----------|-----------|--------|-----------|----------------------------------------------------------------|--------------------|----------------------|
| 708.8576 | 721214    |        |           |                                                                |                    |                      |
| 961.5477 | 961.5479  | 1      | 455760    | C <sub>45</sub> H <sub>68</sub> N <sub>16</sub> O <sub>8</sub> | (M+H) <sup>+</sup> | 0.18                 |
| 962.5503 | 962.5506  | 1      | 257267    | C <sub>45</sub> H <sub>68</sub> N <sub>16</sub> O <sub>8</sub> | (M+H) <sup>+</sup> | 0.29                 |
| 963.5524 | 963.5532  | 1      | 74346     | C <sub>45</sub> H <sub>68</sub> N <sub>16</sub> O <sub>8</sub> | (M+H) <sup>+</sup> | 0.84                 |
| 964.5535 | 964.5558  | 1      | 17695     | C <sub>45</sub> H <sub>68</sub> N <sub>16</sub> O <sub>8</sub> | (M+H) <sup>+</sup> | 2.33                 |
| 965.5507 | 965.5582  | 1      | 3226      | C <sub>45</sub> H <sub>68</sub> N <sub>16</sub> O <sub>8</sub> | (M+H) <sup>+</sup> | 7.82                 |

--- End Of Report ---

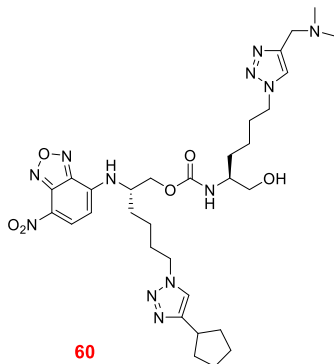

60

Chemical Formula: C<sub>31</sub>H<sub>46</sub>N<sub>12</sub>O<sub>6</sub>  
Exact Mass: 682.37

MS Zoomed Spectrum

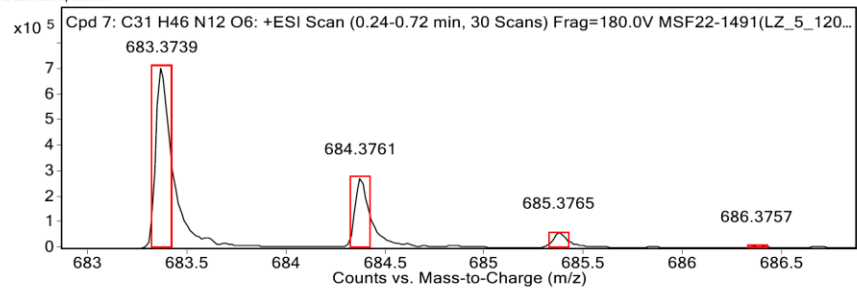

MS Spectrum Peak List

| Obs. m/z | Calc. m/z | Charge | Abundance | Formula                                                        | Ion Species        | Tgt Mass Error (ppm) |
|----------|-----------|--------|-----------|----------------------------------------------------------------|--------------------|----------------------|
| 683.3739 | 683.3736  | 1      | 711672    | C <sub>31</sub> H <sub>46</sub> N <sub>12</sub> O <sub>6</sub> | (M+H) <sup>+</sup> | -0.47                |
| 684.3761 | 684.3763  | 1      | 274587    | C <sub>31</sub> H <sub>46</sub> N <sub>12</sub> O <sub>6</sub> | (M+H) <sup>+</sup> | 0.3                  |
| 685.3765 | 685.3788  | 1      | 62449     | C <sub>31</sub> H <sub>46</sub> N <sub>12</sub> O <sub>6</sub> | (M+H) <sup>+</sup> | 3.41                 |
| 686.3757 | 686.3812  | 1      | 9978      | C <sub>31</sub> H <sub>46</sub> N <sub>12</sub> O <sub>6</sub> | (M+H) <sup>+</sup> | 8.04                 |
| 687.3494 | 687.3836  | 1      | 2431      | C <sub>31</sub> H <sub>46</sub> N <sub>12</sub> O <sub>6</sub> | (M+H) <sup>+</sup> | 49.82                |
| 708.8570 |           |        | 1317642   |                                                                |                    |                      |

--- End Of Report ---

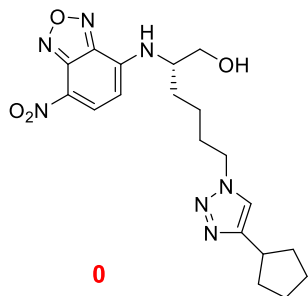

0

Chemical Formula: C<sub>19</sub>H<sub>25</sub>N<sub>7</sub>O<sub>4</sub>  
Exact Mass: 415.20

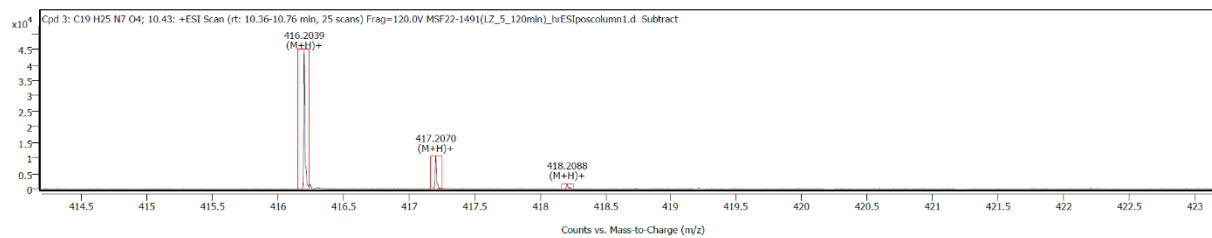

Spectrum Peaks

| Obs. m/z | Calc. m/z | Charge | Abund | Formula                                                       | Ion Species        | Tgt Mass Error (PPM) |
|----------|-----------|--------|-------|---------------------------------------------------------------|--------------------|----------------------|
| 416.2039 | 416.2041  | 1      | 44601 | C <sub>19</sub> H <sub>25</sub> N <sub>7</sub> O <sub>4</sub> | (M+H) <sup>+</sup> | -0.54                |
| 417.2070 | 417.2068  | 1      | 10731 | C <sub>19</sub> H <sub>25</sub> N <sub>7</sub> O <sub>4</sub> | (M+H) <sup>+</sup> | 0.46                 |
| 418.2088 | 418.2092  | 1      | 1547  | C <sub>19</sub> H <sub>25</sub> N <sub>7</sub> O <sub>4</sub> | (M+H) <sup>+</sup> | -0.85                |
| 481.2778 |           |        | 61066 |                                                               |                    |                      |

MassHunter Qual 10.0  
(End of Report)

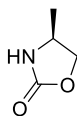

Chemical Formula: C<sub>4</sub>H<sub>7</sub>NO<sub>2</sub>  
Exact Mass: 101.05

#

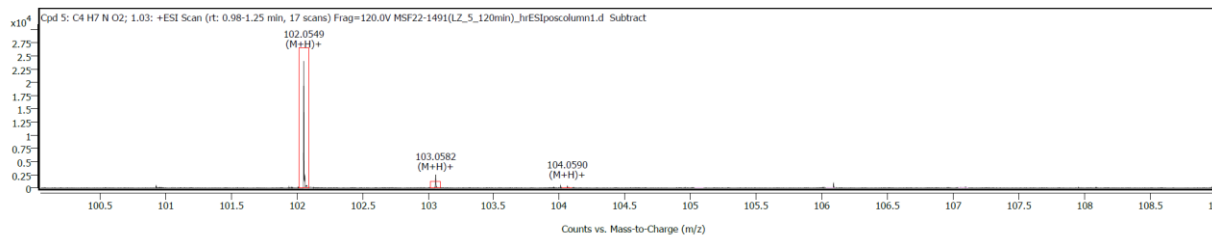

Spectrum Peaks

| Obs. m/z | Calc. m/z | Charge | Abund | Formula                                       | Ion Species        | Tgt Mass Error (PPM) |
|----------|-----------|--------|-------|-----------------------------------------------|--------------------|----------------------|
| 102.0549 | 102.0550  | 1      | 24958 | C <sub>4</sub> H <sub>7</sub> NO <sub>2</sub> | (M+H) <sup>+</sup> | -0.36                |
| 103.0582 | 103.0579  | 1      | 2557  | C <sub>4</sub> H <sub>7</sub> NO <sub>2</sub> | (M+H) <sup>+</sup> | 2.59                 |
| 104.0590 | 104.0595  | 1      | 363   | C <sub>4</sub> H <sub>7</sub> NO <sub>2</sub> | (M+H) <sup>+</sup> | -5.09                |
| 922.0036 |           |        | 37361 |                                               |                    |                      |

MassHunter Qual 10.0  
(End of Report)

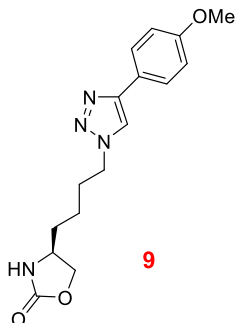

9

Chemical Formula: C<sub>16</sub>H<sub>20</sub>N<sub>4</sub>O<sub>3</sub>  
Exact Mass: 316.15

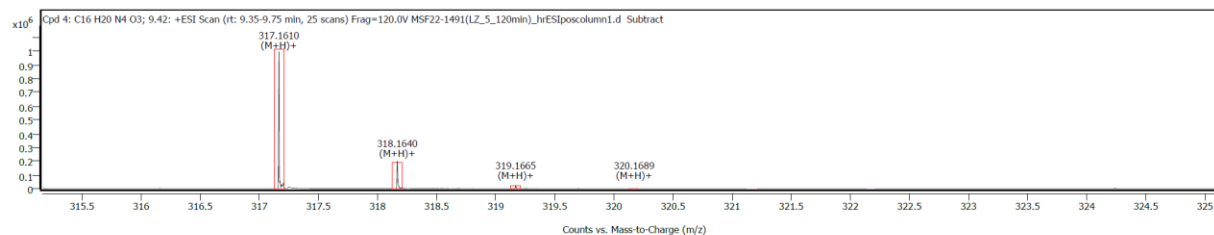

Spectrum Peaks

| Obs. m/z | Calc. m/z | Charge | Abund   | Formula                                                       | Ion Species        | Tgt Mass Error (PPM) |
|----------|-----------|--------|---------|---------------------------------------------------------------|--------------------|----------------------|
| 317.1610 | 317.1608  | 1      | 1001021 | C <sub>16</sub> H <sub>20</sub> N <sub>4</sub> O <sub>3</sub> | (M+H) <sup>+</sup> | 0.63                 |
| 318.1640 | 318.1637  | 1      | 202360  | C <sub>16</sub> H <sub>20</sub> N <sub>4</sub> O <sub>3</sub> | (M+H) <sup>+</sup> | 0.82                 |
| 319.1665 | 319.1662  | 1      | 24087   | C <sub>16</sub> H <sub>20</sub> N <sub>4</sub> O <sub>3</sub> | (M+H) <sup>+</sup> | 0.79                 |
| 320.1689 | 320.1687  | 1      | 2224    | C <sub>16</sub> H <sub>20</sub> N <sub>4</sub> O <sub>3</sub> | (M+H) <sup>+</sup> | 0.71                 |

MassHunter Qual 10.0  
(End of Report)

MS Zoomed Spectrum

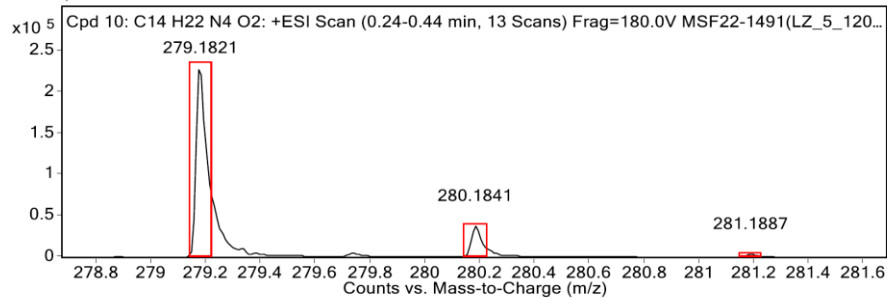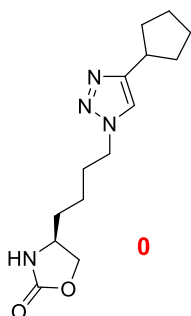

0

Chemical Formula: C<sub>14</sub>H<sub>22</sub>N<sub>4</sub>O<sub>2</sub>  
Exact Mass: 278.17

MS Spectrum Peak List

| Obs. m/z | Calc. m/z | Charge | Abundance | Formula                                                       | Ion Species        | Tgt Mass Error (ppm) |
|----------|-----------|--------|-----------|---------------------------------------------------------------|--------------------|----------------------|
| 279.1821 | 279.1816  | 1      | 234825    | C <sub>14</sub> H <sub>22</sub> N <sub>4</sub> O <sub>2</sub> | (M+H) <sup>+</sup> | -2.05                |
| 280.1841 | 280.1844  | 1      | 38205     | C <sub>14</sub> H <sub>22</sub> N <sub>4</sub> O <sub>2</sub> | (M+H) <sup>+</sup> | 1.15                 |
| 281.1887 | 281.1869  | 1      | 4162      | C <sub>14</sub> H <sub>22</sub> N <sub>4</sub> O <sub>2</sub> | (M+H) <sup>+</sup> | -6.49                |
| 708.8570 |           |        | 1426713   |                                                               |                    |                      |

--- End Of Report ---

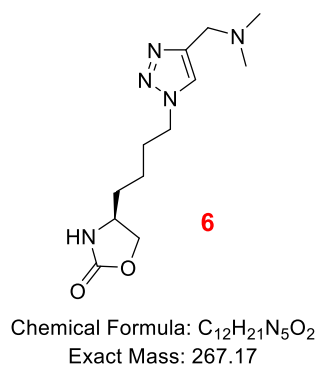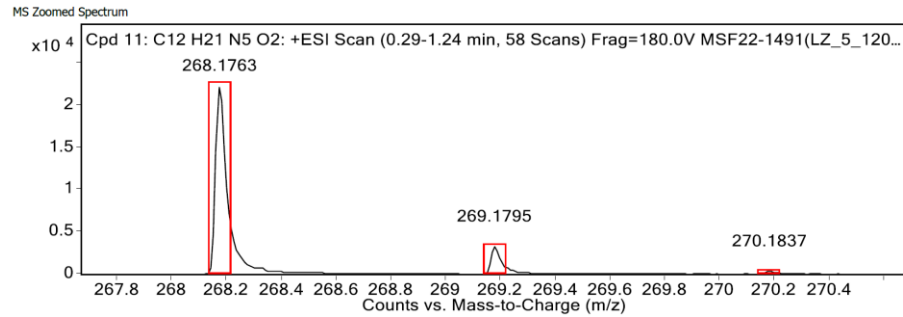

MS Spectrum Peak List

| Obs. m/z | Calc. m/z | Charge | Abundance | Formula              | Ion Species        | Tgt Mass Error (ppm) |
|----------|-----------|--------|-----------|----------------------|--------------------|----------------------|
| 268.1763 | 268.1768  | 1      | 22578     | $C_{12}H_{21}N_5O_2$ | (M+H) <sup>+</sup> | 1.89                 |
| 269.1795 | 269.1794  | 1      | 3329      | $C_{12}H_{21}N_5O_2$ | (M+H) <sup>+</sup> | -0.05                |
| 270.1837 | 270.1818  | 1      | 398       | $C_{12}H_{21}N_5O_2$ | (M+H) <sup>+</sup> | -7.03                |
| 708.8576 |           |        | 525030    |                      |                    |                      |

--- End Of Report ---

**Oligomer 6\_1: \*76f8**

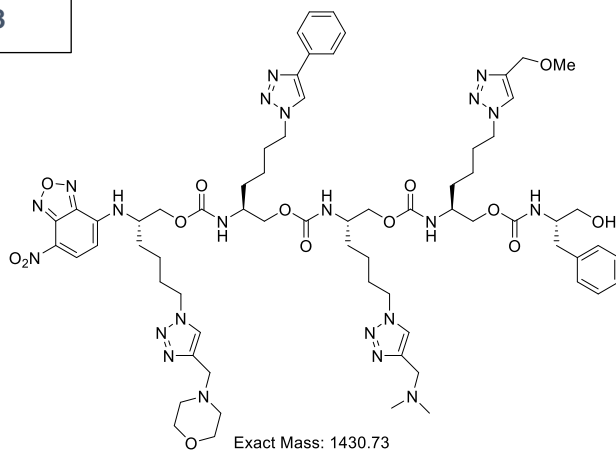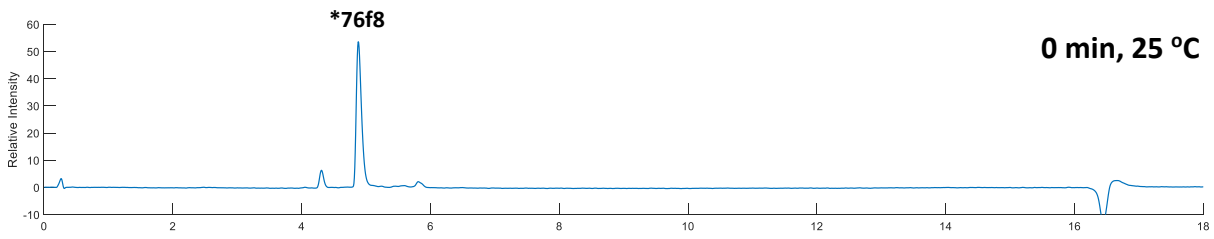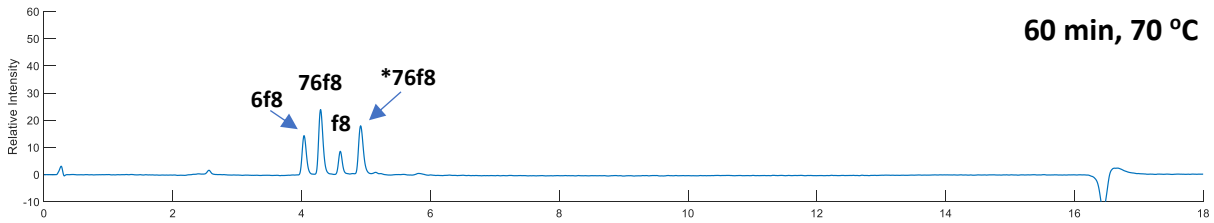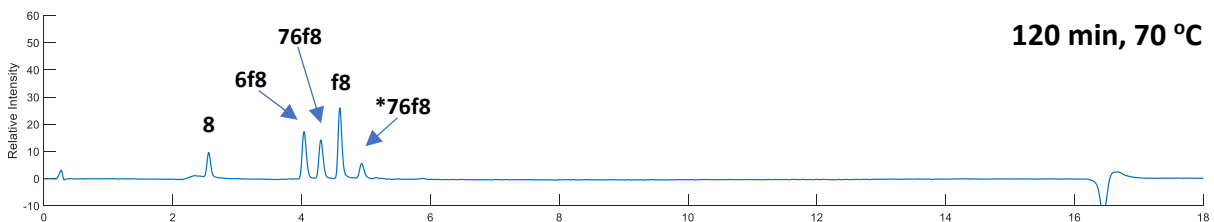

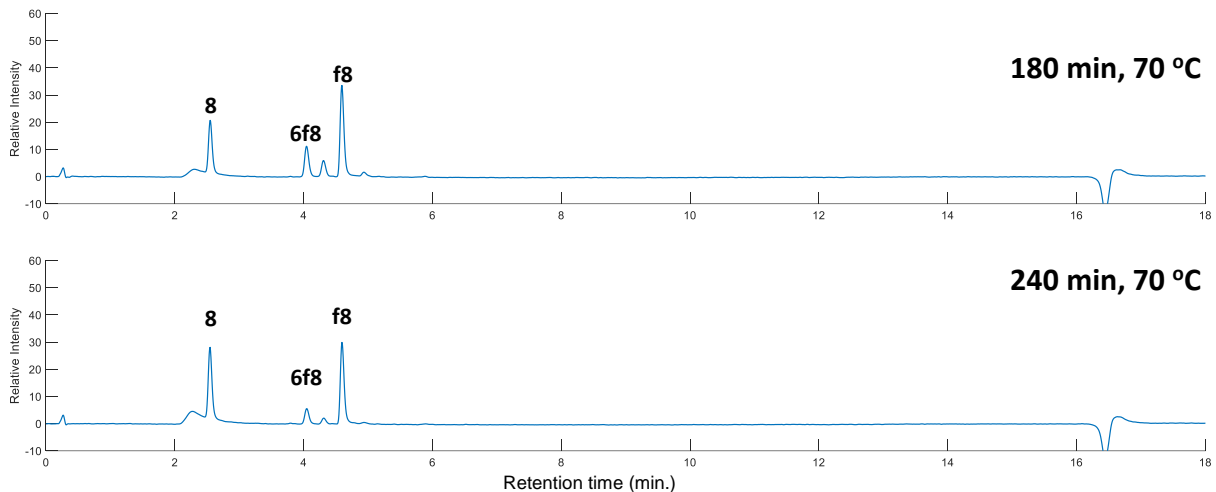

After 120 minutes of sequencing, all the following molecules are observed in the solution and analyzed via High-Res MS.

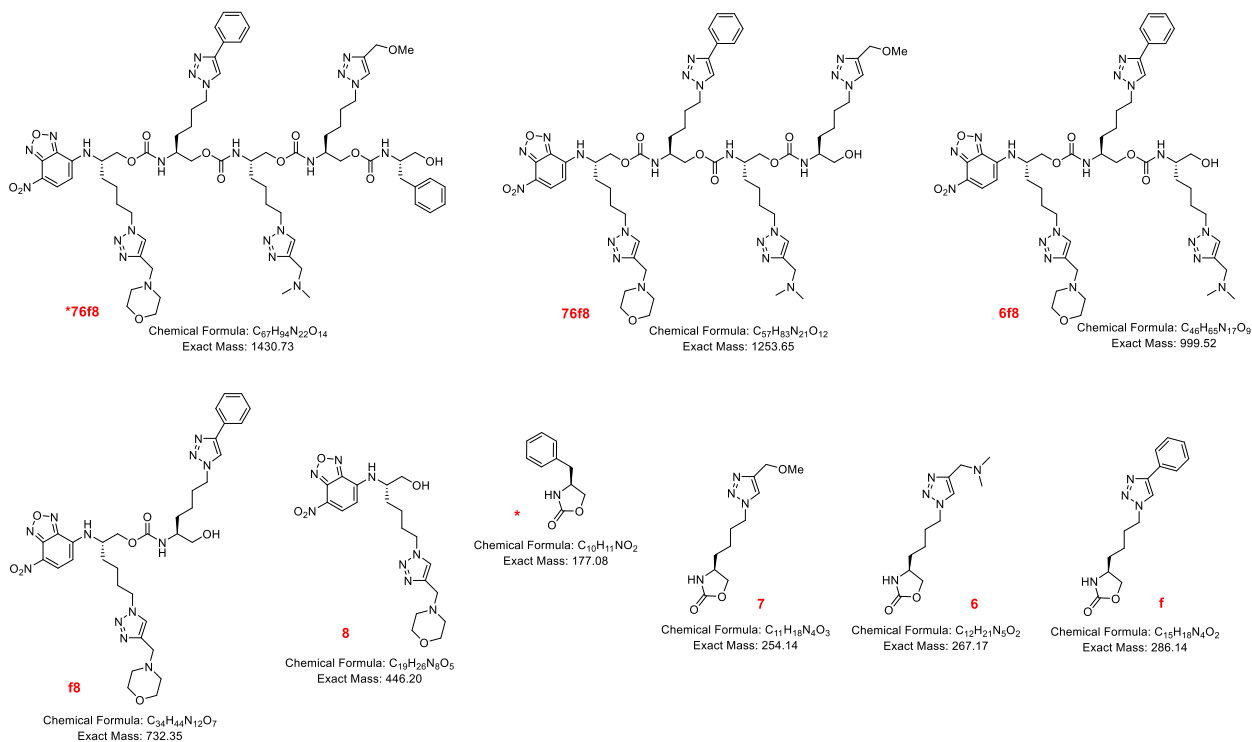

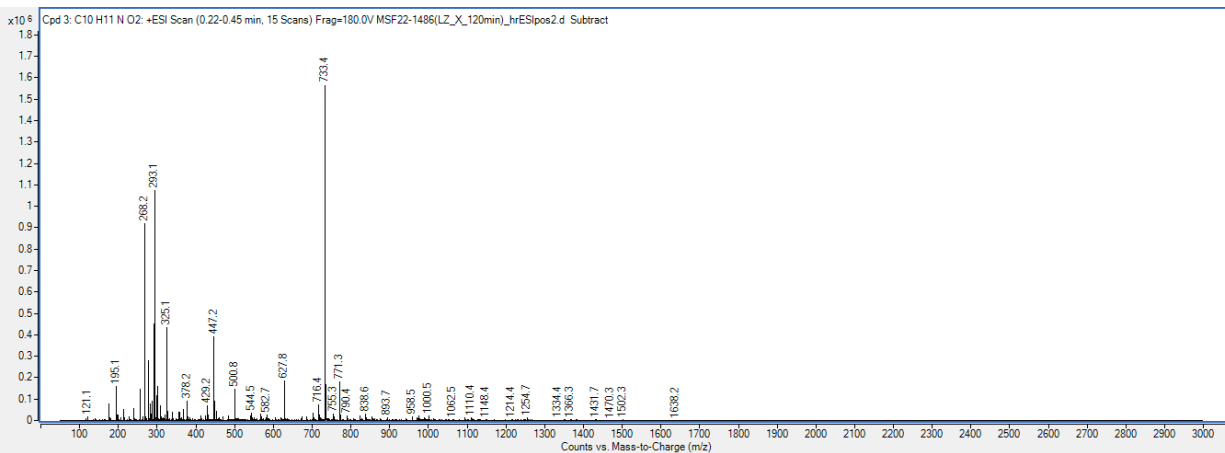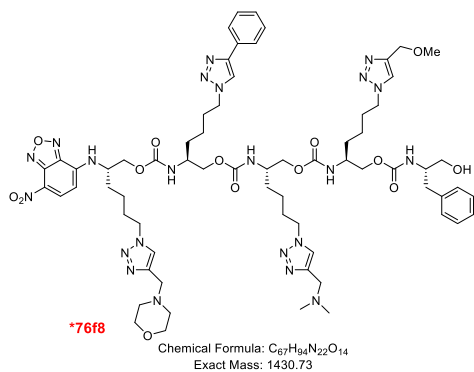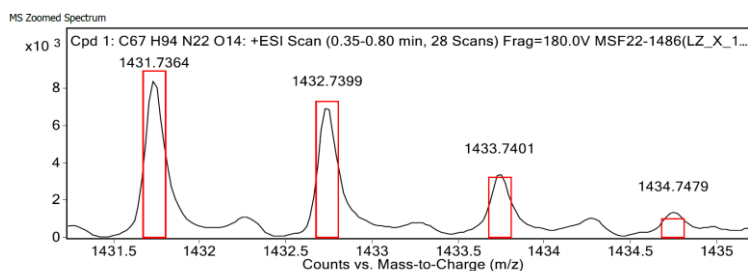

MS Spectrum Peak List

| Obs. m/z  | Calc. m/z | Charge | Abundance | Formula                                                         | Ion Species        | Tgt Mass Error (ppm) |
|-----------|-----------|--------|-----------|-----------------------------------------------------------------|--------------------|----------------------|
| 268.1768  |           |        | 877491    |                                                                 |                    |                      |
| 1431.7364 | 1431.7393 | 1      | 8465      | C <sub>67</sub> H <sub>94</sub> N <sub>22</sub> O <sub>14</sub> | (M+H) <sup>+</sup> | 2.03                 |
| 1432.7399 | 1432.7420 | 1      | 7071      | C <sub>67</sub> H <sub>94</sub> N <sub>22</sub> O <sub>14</sub> | (M+H) <sup>+</sup> | 1.5                  |
| 1433.7401 | 1433.7447 | 1      | 3455      | C <sub>67</sub> H <sub>94</sub> N <sub>22</sub> O <sub>14</sub> | (M+H) <sup>+</sup> | 3.19                 |
| 1434.7479 | 1434.7473 | 1      | 1425      | C <sub>67</sub> H <sub>94</sub> N <sub>22</sub> O <sub>14</sub> | (M+H) <sup>+</sup> | -0.4                 |

--- End Of Report ---

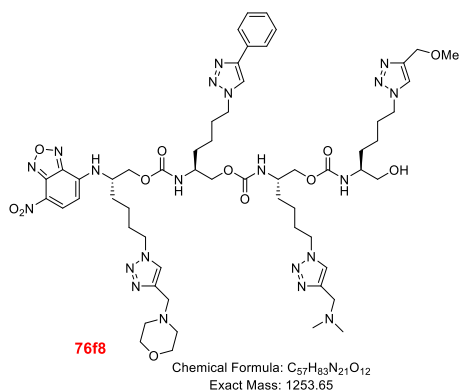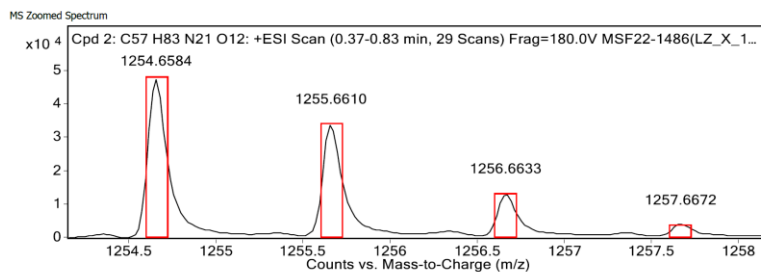

MS Spectrum Peak List

| Obs. m/z  | Calc. m/z | Charge | Abundance | Formula                                                         | Ion Species        | Tgt Mass Error (ppm) |
|-----------|-----------|--------|-----------|-----------------------------------------------------------------|--------------------|----------------------|
| 268.1768  |           |        | 810816    |                                                                 |                    |                      |
| 1254.6584 | 1254.6603 | 1      | 47537     | C <sub>57</sub> H <sub>83</sub> N <sub>21</sub> O <sub>12</sub> | (M+H) <sup>+</sup> | 1.51                 |
| 1255.6610 | 1255.6630 | 1      | 34020     | C <sub>57</sub> H <sub>83</sub> N <sub>21</sub> O <sub>12</sub> | (M+H) <sup>+</sup> | 1.59                 |
| 1256.6633 | 1256.6656 | 1      | 13186     | C <sub>57</sub> H <sub>83</sub> N <sub>21</sub> O <sub>12</sub> | (M+H) <sup>+</sup> | 1.8                  |
| 1257.6672 | 1257.6681 | 1      | 3804      | C <sub>57</sub> H <sub>83</sub> N <sub>21</sub> O <sub>12</sub> | (M+H) <sup>+</sup> | 0.74                 |
| 1258.6924 | 1258.6706 | 1      | 931       | C <sub>57</sub> H <sub>83</sub> N <sub>21</sub> O <sub>12</sub> | (M+H) <sup>+</sup> | -17.35               |

--- End Of Report ---



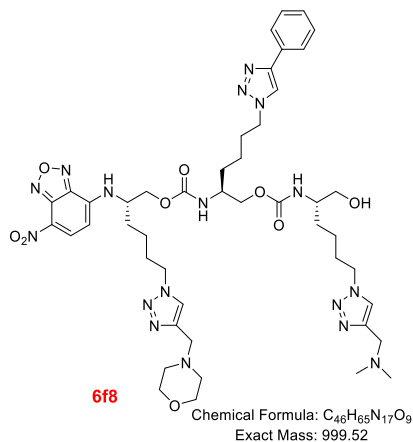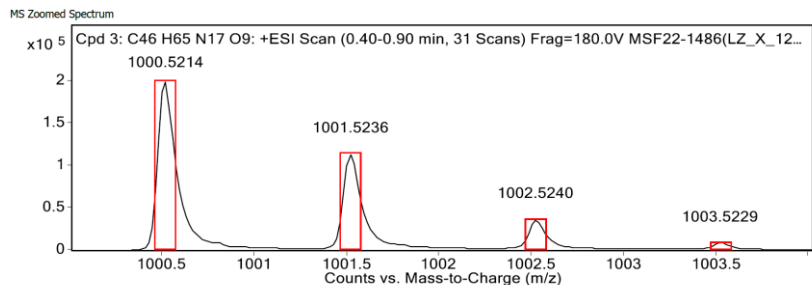

MS Spectrum Peak List

| Obs. m/z  | Calc. m/z | Charge | Abundance | Formula                 | Ion Species        | Tgt Mass Error (ppm) |
|-----------|-----------|--------|-----------|-------------------------|--------------------|----------------------|
| 268.1768  |           |        | 671398    |                         |                    |                      |
| 1000.5214 | 1000.5224 | 1      | 200279    | $C_{46}H_{65}N_{17}O_9$ | (M+H) <sup>+</sup> | 0.95                 |
| 1001.5236 | 1001.5251 | 1      | 113494    | $C_{46}H_{65}N_{17}O_9$ | (M+H) <sup>+</sup> | 1.47                 |
| 1002.5240 | 1002.5277 | 1      | 35910     | $C_{46}H_{65}N_{17}O_9$ | (M+H) <sup>+</sup> | 3.71                 |
| 1003.5229 | 1003.5302 | 1      | 7840      | $C_{46}H_{65}N_{17}O_9$ | (M+H) <sup>+</sup> | 7.26                 |
| 1004.4888 | 1004.5326 | 1      | 2248      | $C_{46}H_{65}N_{17}O_9$ | (M+H) <sup>+</sup> | 43.6                 |

--- End Of Report ---

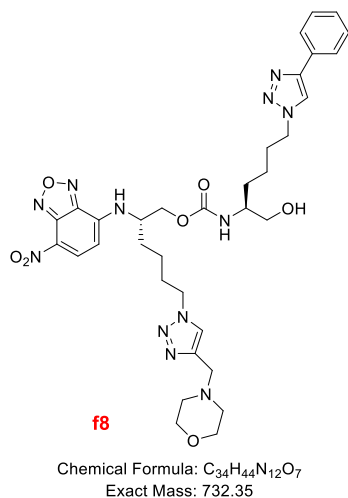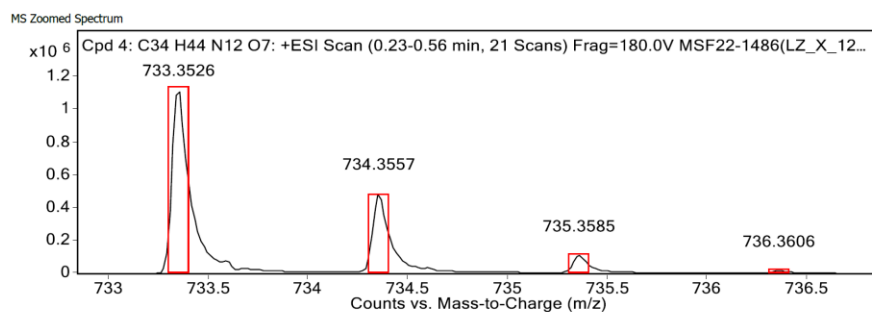

MS Spectrum Peak List

| Obs. m/z | Calc. m/z | Charge | Abundance | Formula                 | Ion Species        | Tgt Mass Error (ppm) |
|----------|-----------|--------|-----------|-------------------------|--------------------|----------------------|
| 733.3526 | 733.3529  | 1      | 1126879   | $C_{34}H_{44}N_{12}O_7$ | (M+H) <sup>+</sup> | 0.43                 |
| 734.3557 | 734.3556  | 1      | 489317    | $C_{34}H_{44}N_{12}O_7$ | (M+H) <sup>+</sup> | -0.1                 |
| 735.3585 | 735.3581  | 1      | 110820    | $C_{34}H_{44}N_{12}O_7$ | (M+H) <sup>+</sup> | -0.46                |
| 736.3606 | 736.3606  | 1      | 17291     | $C_{34}H_{44}N_{12}O_7$ | (M+H) <sup>+</sup> | 0.08                 |
| 737.3570 | 737.3630  | 1      | 2994      | $C_{34}H_{44}N_{12}O_7$ | (M+H) <sup>+</sup> | 8.2                  |
| 738.3585 | 738.3654  | 1      | 858       | $C_{34}H_{44}N_{12}O_7$ | (M+H) <sup>+</sup> | 9.38                 |

--- End Of Report ---

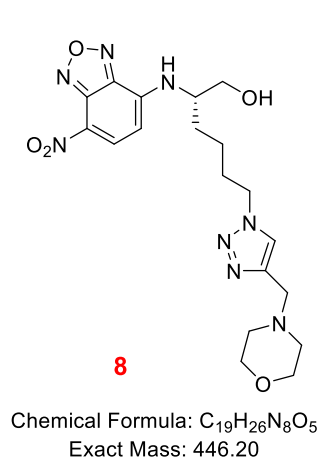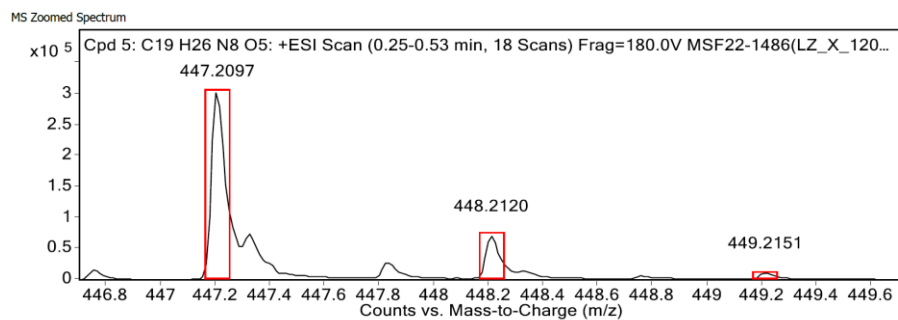

MS Spectrum Peak List

| Obs. m/z | Calc. m/z | Charge | Abundance | Formula              | Ion Species        | Tgt Mass Error (ppm) |
|----------|-----------|--------|-----------|----------------------|--------------------|----------------------|
| 447.2097 | 447.2099  | 1      | 305704    | $C_{19}H_{26}N_8O_5$ | (M+H) <sup>+</sup> | 0.46                 |
| 448.2120 | 448.2125  | 1      | 70604     | $C_{19}H_{26}N_8O_5$ | (M+H) <sup>+</sup> | 1.21                 |
| 449.2151 | 449.2148  | 1      | 10564     | $C_{19}H_{26}N_8O_5$ | (M+H) <sup>+</sup> | -0.6                 |
| 450.2183 | 450.2172  | 1      | 1816      | $C_{19}H_{26}N_8O_5$ | (M+H) <sup>+</sup> | -2.56                |
| 733.3526 |           |        | 1270069   |                      |                    |                      |

--- End Of Report ---

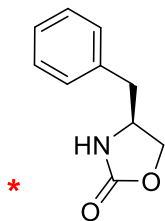

Chemical Formula:  $C_{10}H_{11}NO_2$   
Exact Mass: 177.08

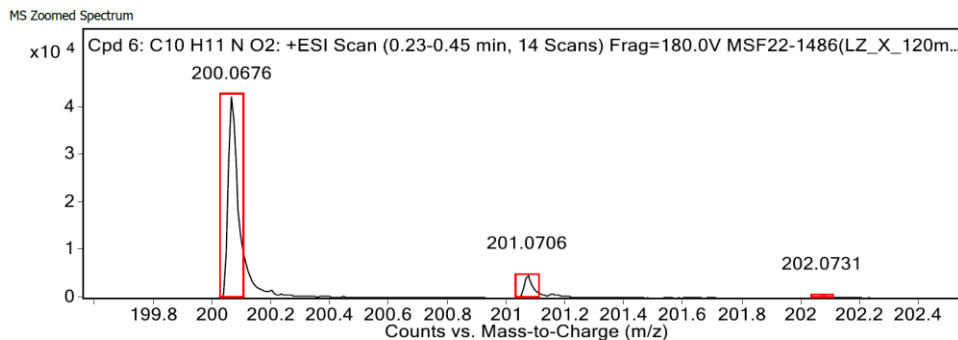

| Obs. m/z | Calc. m/z | Charge | Abundance | Formula            | Ion Species | Tgt Mass Error (ppm) |
|----------|-----------|--------|-----------|--------------------|-------------|----------------------|
| 200.0676 | 200.0682  | 1      | 42671     | $C_{10}H_{11}NO_2$ | (M+Na)+     | 3                    |
| 201.0706 | 201.0714  | 1      | 4777      | $C_{10}H_{11}NO_2$ | (M+Na)+     | 3.72                 |
| 202.0731 | 202.0737  | 1      | 442       | $C_{10}H_{11}NO_2$ | (M+Na)+     | 3.13                 |
| 733.3523 |           |        | 1368605   |                    |             |                      |

--- End Of Report ---

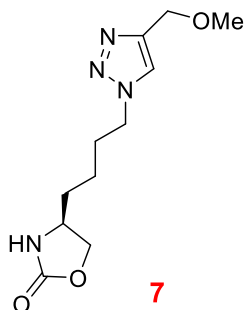

Chemical Formula:  $C_{11}H_{18}N_4O_3$   
Exact Mass: 254.14

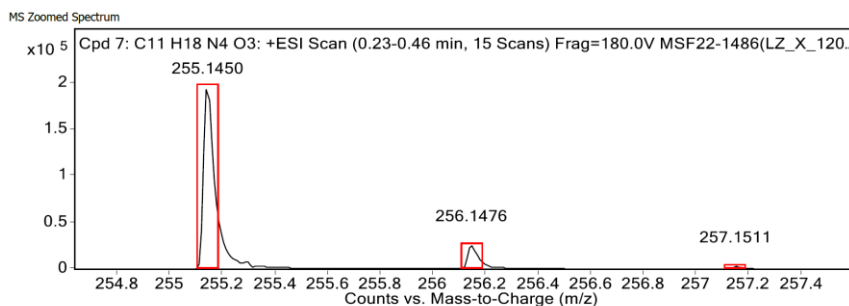

| Obs. m/z | Calc. m/z | Charge | Abundance | Formula              | Ion Species | Tgt Mass Error (ppm) |
|----------|-----------|--------|-----------|----------------------|-------------|----------------------|
| 255.1450 | 255.1452  | 1      | 197367    | $C_{11}H_{18}N_4O_3$ | (M+H)+      | 0.72                 |
| 256.1476 | 256.1479  | 1      | 25928     | $C_{11}H_{18}N_4O_3$ | (M+H)+      | 1.16                 |
| 257.1511 | 257.1501  | 1      | 3100      | $C_{11}H_{18}N_4O_3$ | (M+H)+      | -3.98                |
| 258.1586 | 258.1524  | 1      | 426       | $C_{11}H_{18}N_4O_3$ | (M+H)+      | -23.88               |
| 733.3524 |           |        | 1352653   |                      |             |                      |

--- End Of Report ---

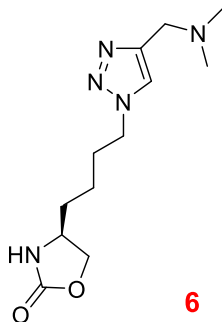

Chemical Formula:  $C_{12}H_{21}N_5O_2$   
Exact Mass: 267.17

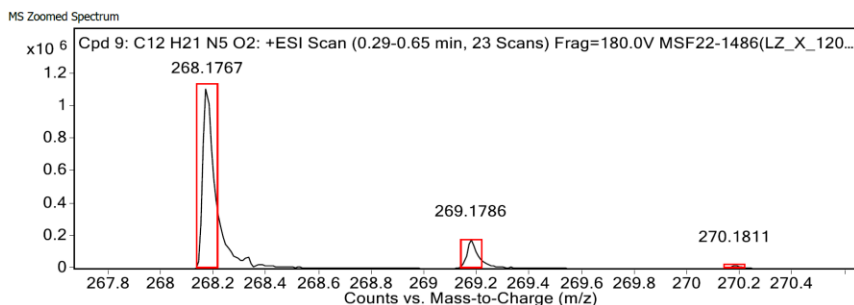

| Obs. m/z | Calc. m/z | Charge | Abundance | Formula              | Ion Species | Tgt Mass Error (ppm) |
|----------|-----------|--------|-----------|----------------------|-------------|----------------------|
| 268.1767 | 268.1768  | 1      | 1121969   | $C_{12}H_{21}N_5O_2$ | (M+H)+      | 0.31                 |
| 269.1786 | 269.1794  | 1      | 176131    | $C_{12}H_{21}N_5O_2$ | (M+H)+      | 3.1                  |
| 270.1811 | 270.1818  | 1      | 18622     | $C_{12}H_{21}N_5O_2$ | (M+H)+      | 2.3                  |
| 271.1675 | 271.1841  | 1      | 3471      | $C_{12}H_{21}N_5O_2$ | (M+H)+      | 61.2                 |

--- End Of Report ---

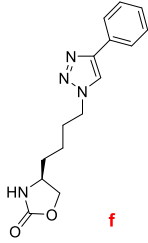

Chemical Formula: C<sub>15</sub>H<sub>18</sub>N<sub>4</sub>O<sub>2</sub>  
Exact Mass: 286.14

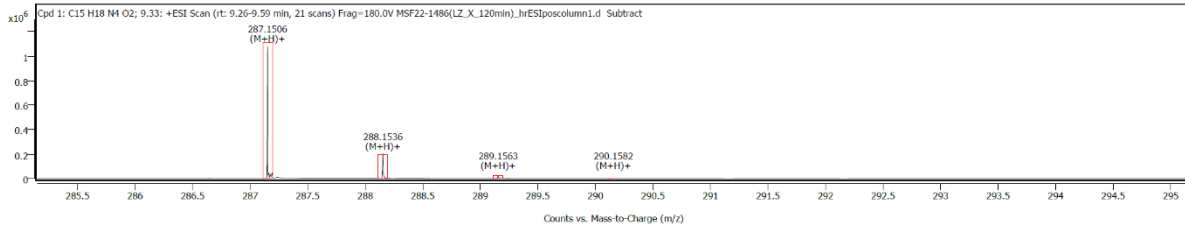

Spectrum Peaks

| Obs. m/z | Calc. m/z | Charge | Abund   | Formula                                                       | Ion Species        | Tgt Mass Error (PPM) |
|----------|-----------|--------|---------|---------------------------------------------------------------|--------------------|----------------------|
| 287.1506 | 287.1503  | 1      | 1100940 | C <sub>15</sub> H <sub>18</sub> N <sub>4</sub> O <sub>2</sub> | (M+H) <sup>+</sup> | 1.14                 |
| 288.1536 | 288.1531  | 1      | 205374  | C <sub>15</sub> H <sub>18</sub> N <sub>4</sub> O <sub>2</sub> | (M+H) <sup>+</sup> | 1.73                 |
| 289.1563 | 289.1557  | 1      | 22564   | C <sub>15</sub> H <sub>18</sub> N <sub>4</sub> O <sub>2</sub> | (M+H) <sup>+</sup> | 2.31                 |
| 290.1582 | 290.1581  | 1      | 1424    | C <sub>15</sub> H <sub>18</sub> N <sub>4</sub> O <sub>2</sub> | (M+H) <sup>+</sup> | 0.22                 |
| 733.3531 |           |        | 1177512 |                                                               |                    |                      |

MassHunter Qual 10.0  
(End of Report)

Oligomer 6\_2: \*76f8

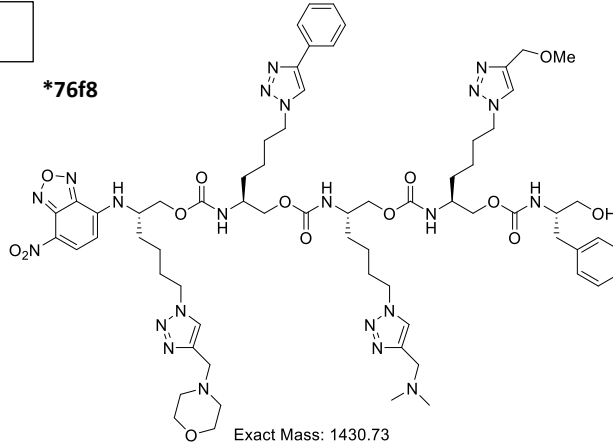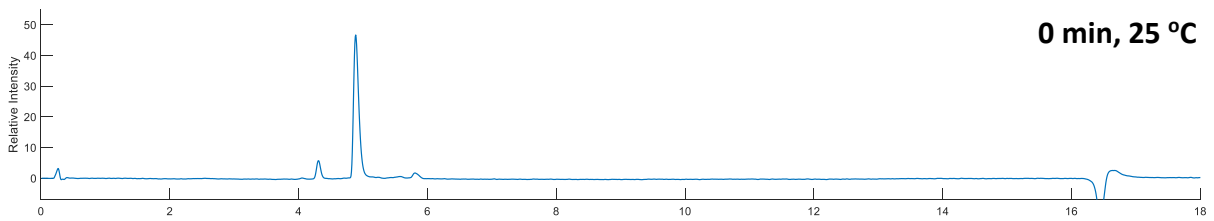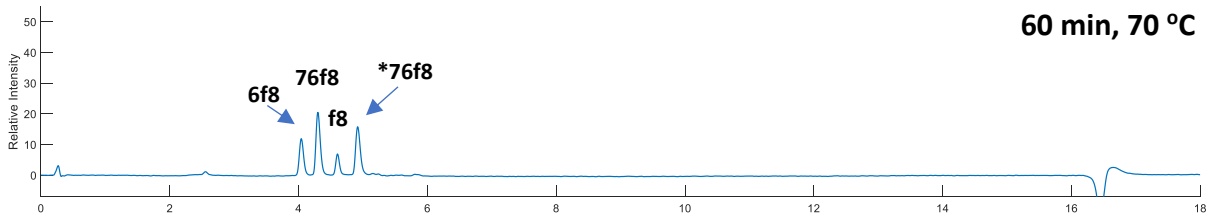

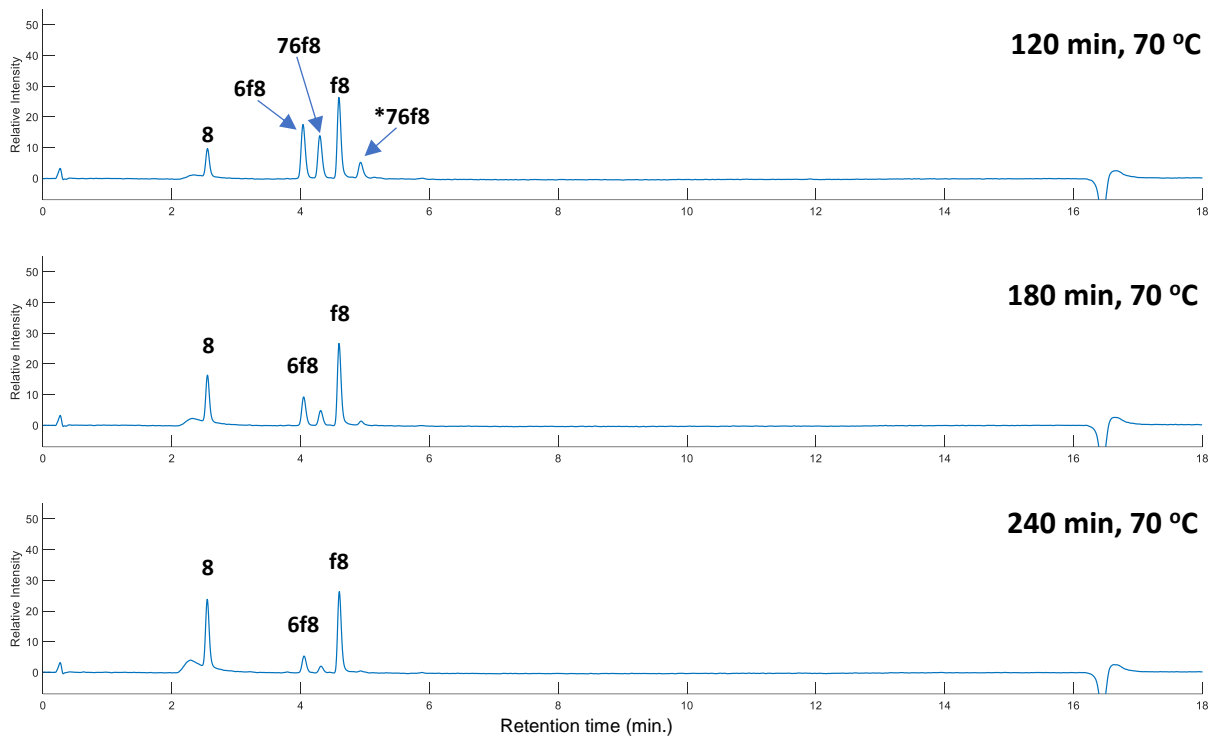

Oligomer Z1\_1: \*YI

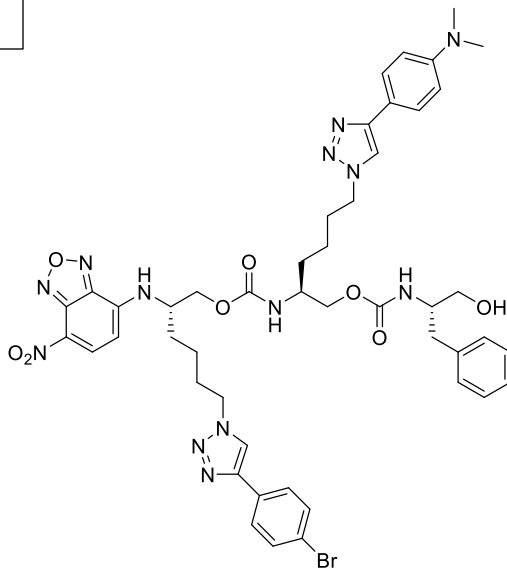

Exact Mass: 1007.34

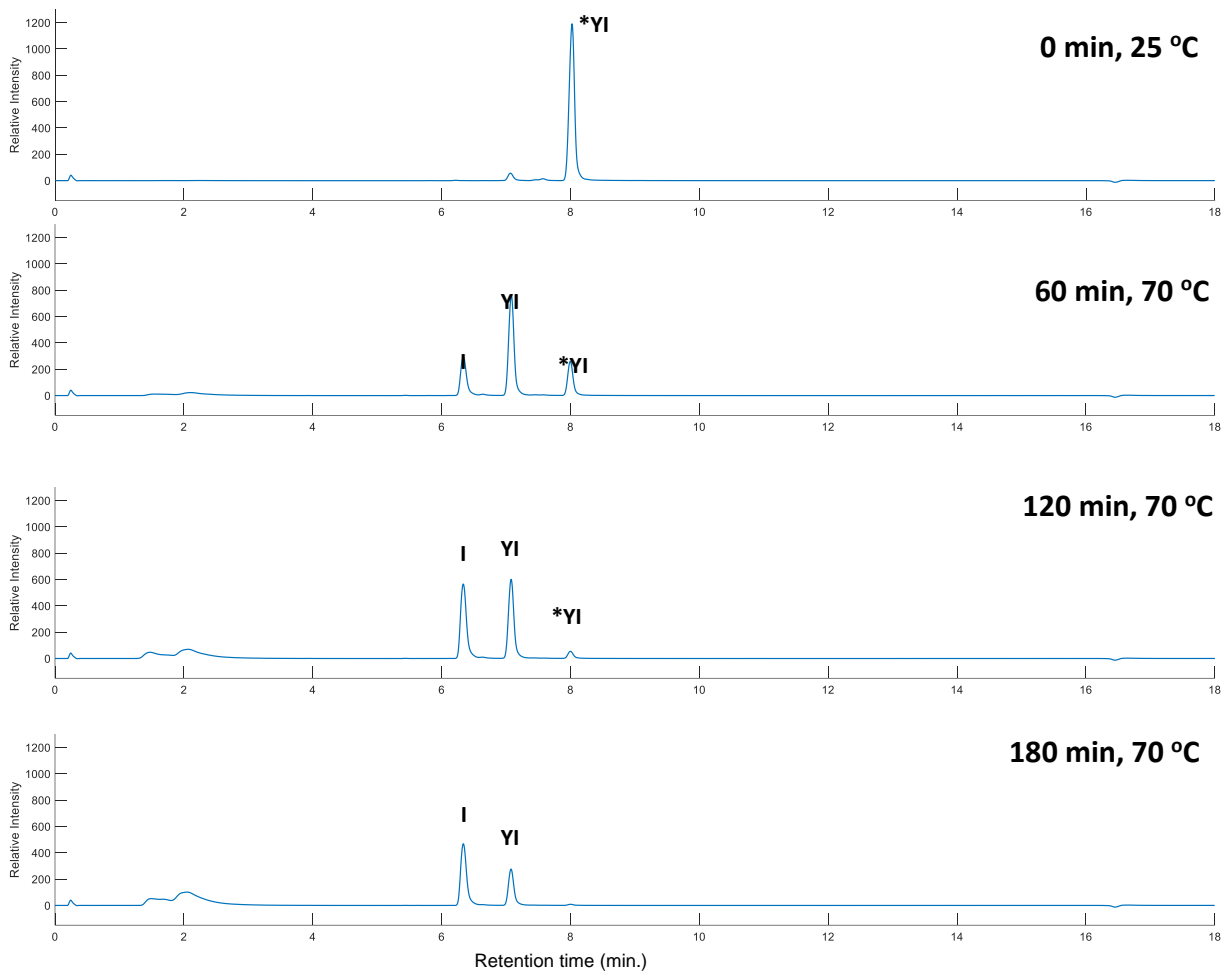

After 60 minutes of sequencing, all the following molecules are observed in the solution and analyzed via High-Res MS.

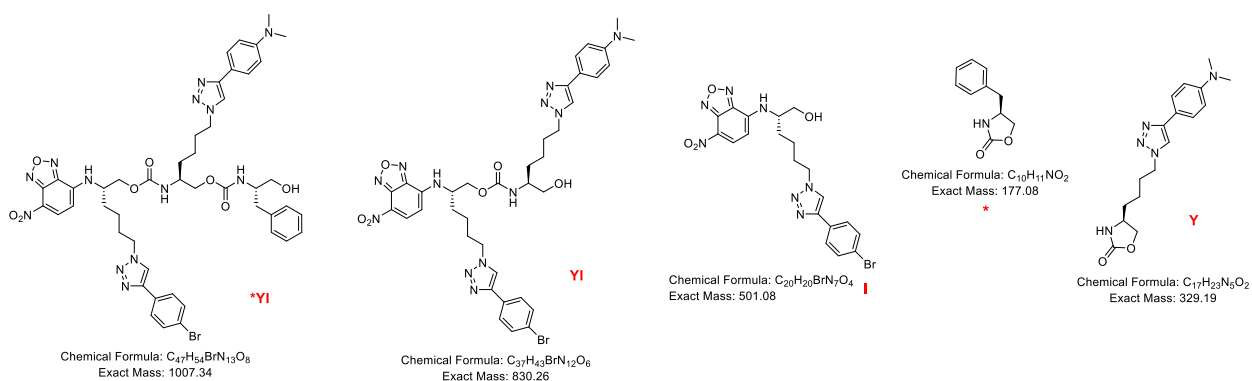

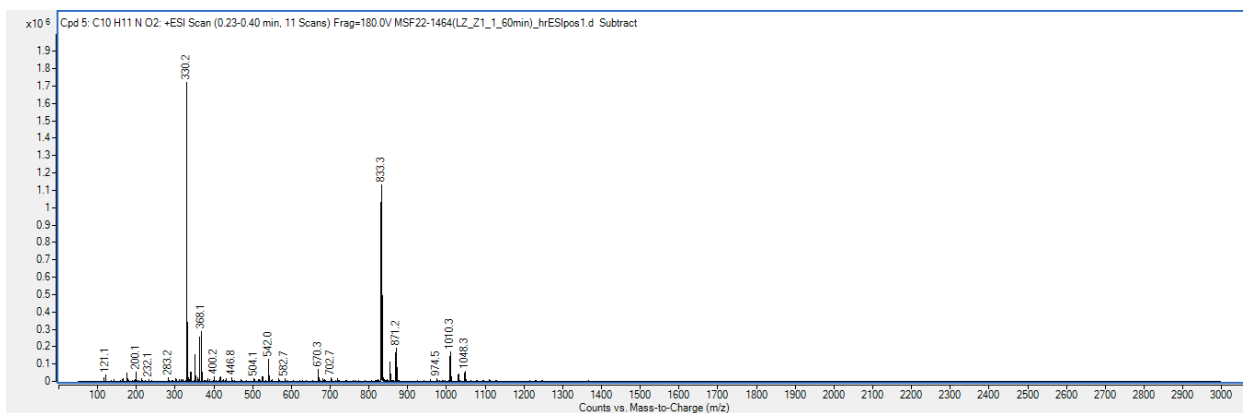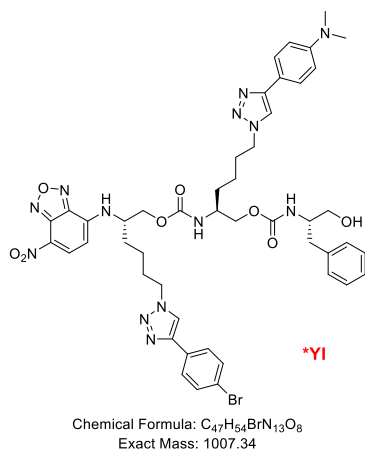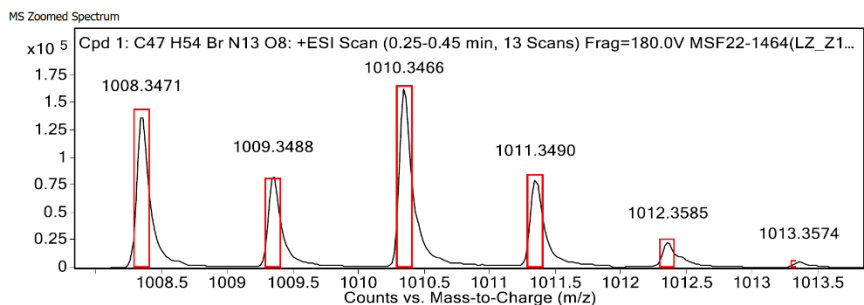

MS Spectrum Peak List

| Obs. m/z  | Calc. m/z | Charge | Abundance | Formula       | Ion Species | Tgt Mass Error (ppm) |
|-----------|-----------|--------|-----------|---------------|-------------|----------------------|
| 330.1927  |           |        | 1631671   |               |             |                      |
| 1008.3471 | 1008.3474 | 1      | 139751    | C47H54BrN13O8 | (M+H)+      | 0.32                 |
| 1009.3488 | 1009.3503 | 1      | 84139     | C47H54BrN13O8 | (M+H)+      | 1.51                 |
| 1010.3466 | 1010.3466 | 1      | 164479    | C47H54BrN13O8 | (M+H)+      | -0.02                |
| 1011.3490 | 1011.3487 | 1      | 80795     | C47H54BrN13O8 | (M+H)+      | -0.25                |
| 1012.3585 | 1012.3512 | 1      | 23911     | C47H54BrN13O8 | (M+H)+      | -7.14                |
| 1013.3574 | 1013.3538 | 1      | 5160      | C47H54BrN13O8 | (M+H)+      | -3.59                |

--- End Of Report ---

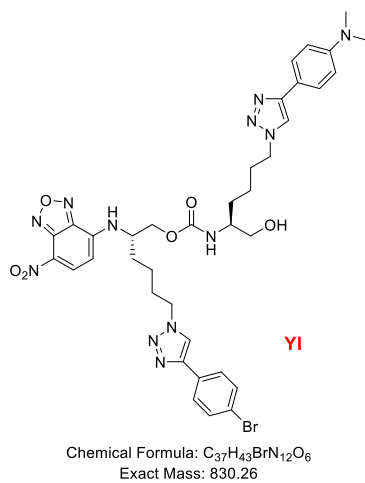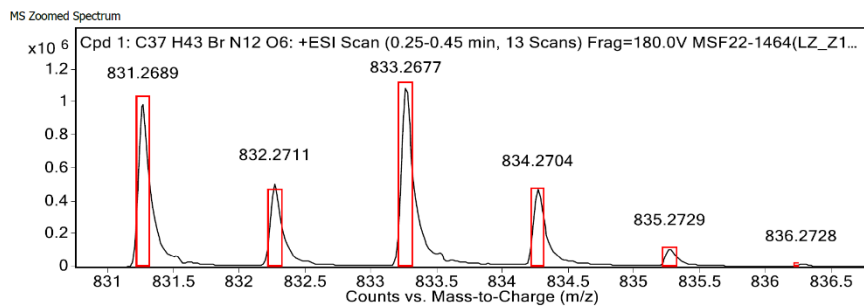

MS Spectrum Peak List

| Obs. m/z | Calc. m/z | Charge | Abundance | Formula       | Ion Species | Tgt Mass Error (ppm) |
|----------|-----------|--------|-----------|---------------|-------------|----------------------|
| 330.1927 |           |        | 1631767   |               |             |                      |
| 831.2689 | 831.2685  | 1      | 1006838   | C37H43BrN12O6 | (M+H)+      | -0.48                |
| 832.2711 | 832.2712  | 1      | 509775    | C37H43BrN12O6 | (M+H)+      | 0.18                 |
| 833.2677 | 833.2672  | 1      | 1108627   | C37H43BrN12O6 | (M+H)+      | -0.59                |
| 834.2704 | 834.2695  | 1      | 473370    | C37H43BrN12O6 | (M+H)+      | -1.07                |
| 835.2729 | 835.2720  | 1      | 114724    | C37H43BrN12O6 | (M+H)+      | -1.11                |
| 836.2728 | 836.2745  | 1      | 16771     | C37H43BrN12O6 | (M+H)+      | 1.97                 |
| 837.2740 | 837.2769  | 1      | 2459      | C37H43BrN12O6 | (M+H)+      | 3.53                 |

--- End Of Report ---

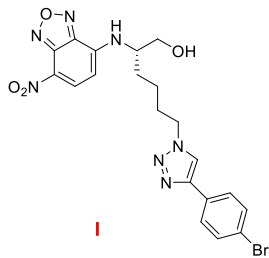

Chemical Formula: C<sub>20</sub>H<sub>20</sub>BrN<sub>7</sub>O<sub>4</sub>  
Exact Mass: 501.08

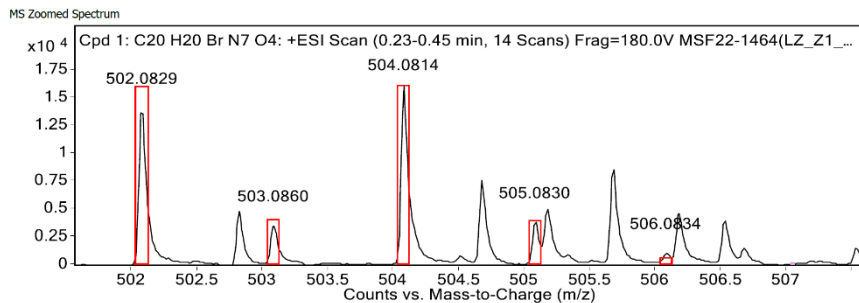

| Obs. m/z | Calc. m/z | Charge | Abundance | Formula                                                         | Ion Species        | Tgt Mass Error (ppm) |
|----------|-----------|--------|-----------|-----------------------------------------------------------------|--------------------|----------------------|
| 330.1927 |           |        | 1516400   |                                                                 |                    |                      |
| 502.0829 | 502.0833  | 1      | 14174     | C <sub>20</sub> H <sub>20</sub> BrN <sub>7</sub> O <sub>4</sub> | (M+H) <sup>+</sup> | 0.78                 |
| 503.0860 | 503.0860  | 1      | 3568      | C <sub>20</sub> H <sub>20</sub> BrN <sub>7</sub> O <sub>4</sub> | (M+H) <sup>+</sup> | -0.03                |
| 504.0814 | 504.0815  | 1      | 16105     | C <sub>20</sub> H <sub>20</sub> BrN <sub>7</sub> O <sub>4</sub> | (M+H) <sup>+</sup> | 0.14                 |
| 505.0830 | 505.0841  | 1      | 3865      | C <sub>20</sub> H <sub>20</sub> BrN <sub>7</sub> O <sub>4</sub> | (M+H) <sup>+</sup> | 2.07                 |
| 506.0834 | 506.0865  | 1      | 1086      | C <sub>20</sub> H <sub>20</sub> BrN <sub>7</sub> O <sub>4</sub> | (M+H) <sup>+</sup> | 6.12                 |

--- End Of Report ---

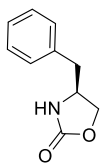

Chemical Formula: C<sub>10</sub>H<sub>11</sub>NO<sub>2</sub>  
Exact Mass: 177.08

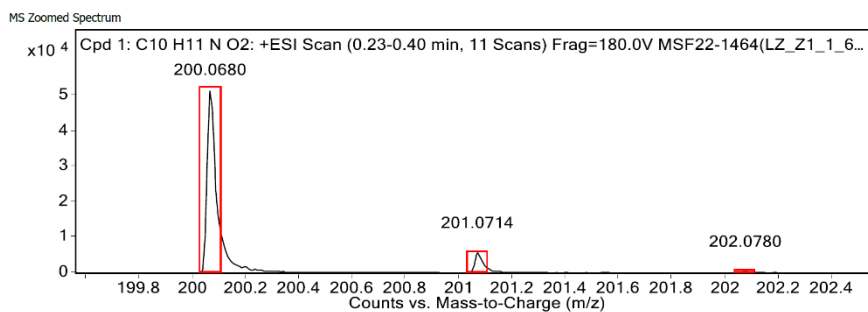

| Obs. m/z | Calc. m/z | Charge | Abundance | Formula                                         | Ion Species         | Tgt Mass Error (ppm) |
|----------|-----------|--------|-----------|-------------------------------------------------|---------------------|----------------------|
| 200.0680 | 200.0682  | 1      | 52132     | C <sub>10</sub> H <sub>11</sub> NO <sub>2</sub> | (M+Na) <sup>+</sup> | 0.88                 |
| 201.0714 | 201.0714  | 1      | 5911      | C <sub>10</sub> H <sub>11</sub> NO <sub>2</sub> | (M+Na) <sup>+</sup> | 0.04                 |
| 202.0780 | 202.0737  | 1      | 628       | C <sub>10</sub> H <sub>11</sub> NO <sub>2</sub> | (M+Na) <sup>+</sup> | -21.08               |
| 330.1926 |           |        | 1735902   |                                                 |                     |                      |

--- End Of Report ---

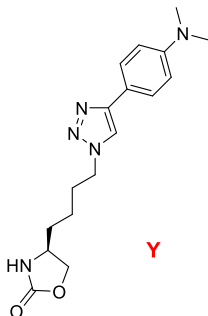

Chemical Formula: C<sub>17</sub>H<sub>23</sub>N<sub>5</sub>O<sub>2</sub>  
Exact Mass: 329.19

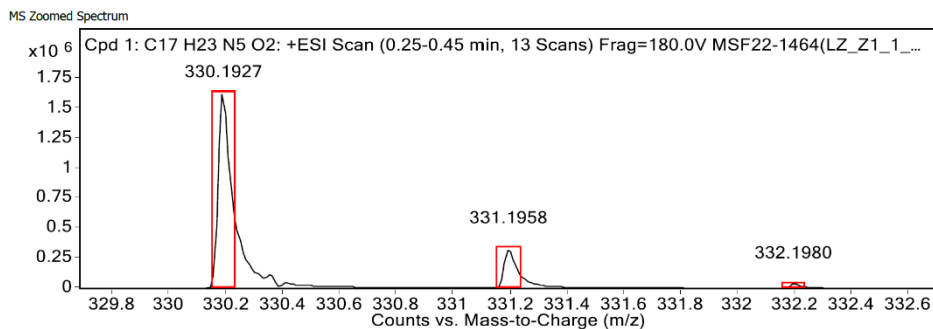

| Obs. m/z | Calc. m/z | Charge | Abundance | Formula                                                       | Ion Species        | Tgt Mass Error (ppm) |
|----------|-----------|--------|-----------|---------------------------------------------------------------|--------------------|----------------------|
| 330.1927 | 330.1925  | 1      | 1631610   | C <sub>17</sub> H <sub>23</sub> N <sub>5</sub> O <sub>2</sub> | (M+H) <sup>+</sup> | -0.83                |
| 331.1958 | 331.1953  | 1      | 329494    | C <sub>17</sub> H <sub>23</sub> N <sub>5</sub> O <sub>2</sub> | (M+H) <sup>+</sup> | -1.67                |
| 332.1980 | 332.1979  | 1      | 36961     | C <sub>17</sub> H <sub>23</sub> N <sub>5</sub> O <sub>2</sub> | (M+H) <sup>+</sup> | -0.44                |
| 333.2098 | 333.2003  | 1      | 5255      | C <sub>17</sub> H <sub>23</sub> N <sub>5</sub> O <sub>2</sub> | (M+H) <sup>+</sup> | -28.5                |
| 334.2105 | 334.2028  | 1      | 1033      | C <sub>17</sub> H <sub>23</sub> N <sub>5</sub> O <sub>2</sub> | (M+H) <sup>+</sup> | -23.2                |

--- End Of Report ---

Oligomer Z1\_2: \*YI

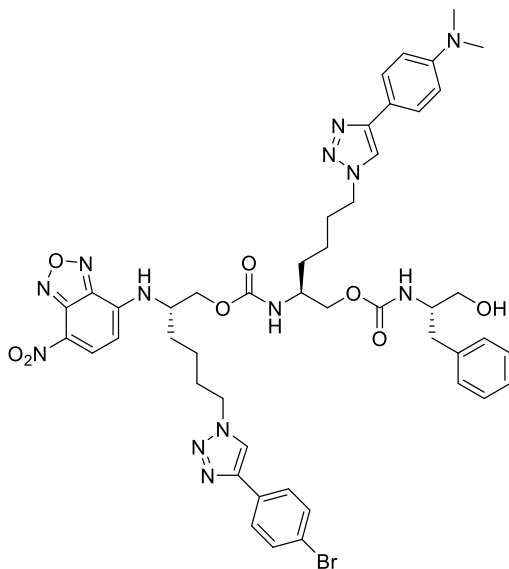

Exact Mass: 1007.34

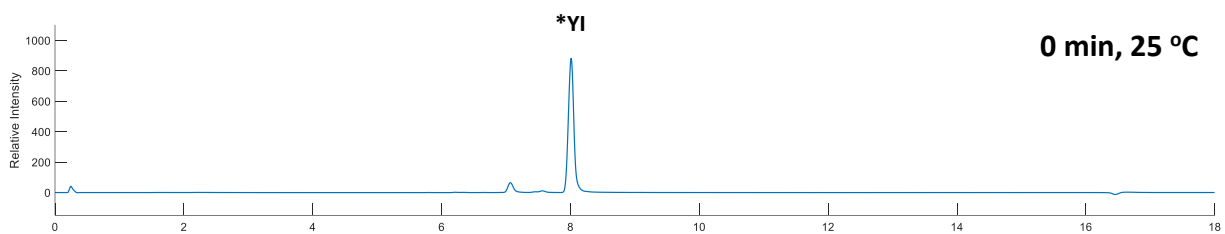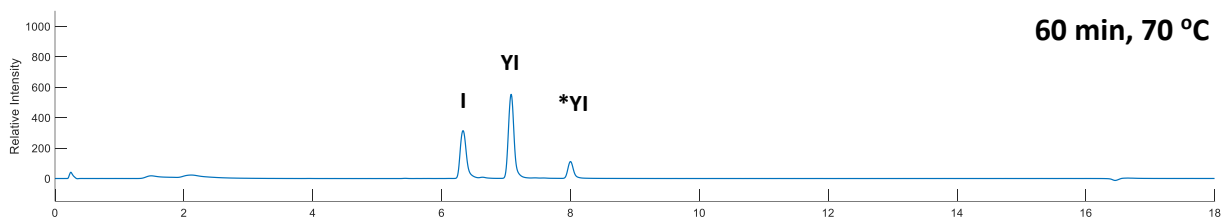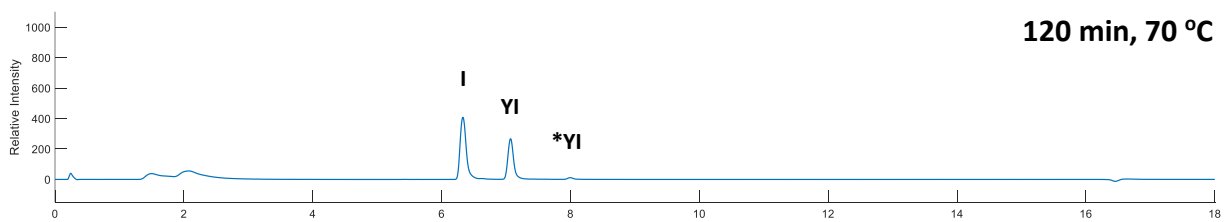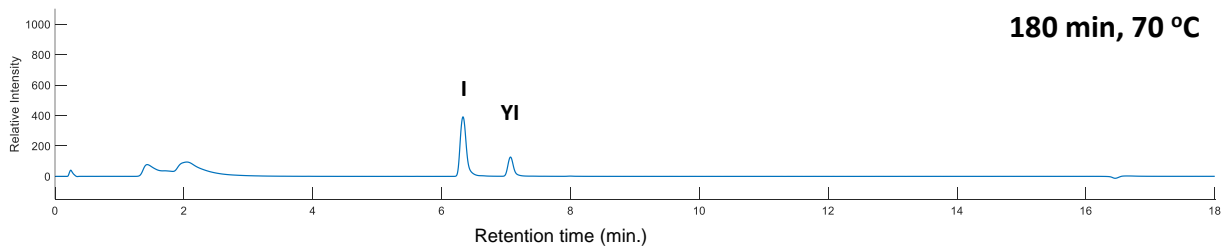



**Oligomer Z2: \*YT**

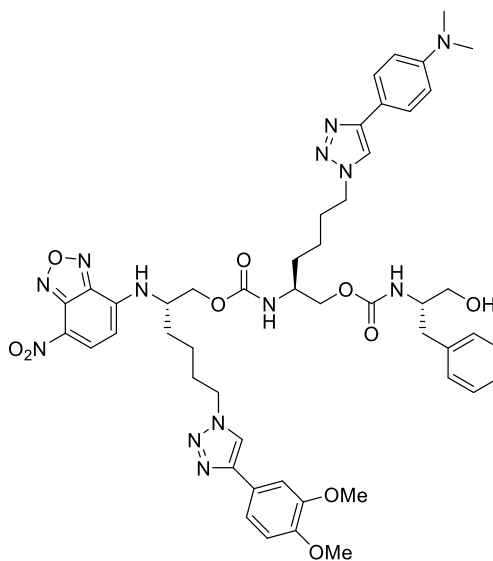

Exact Mass: 989.45

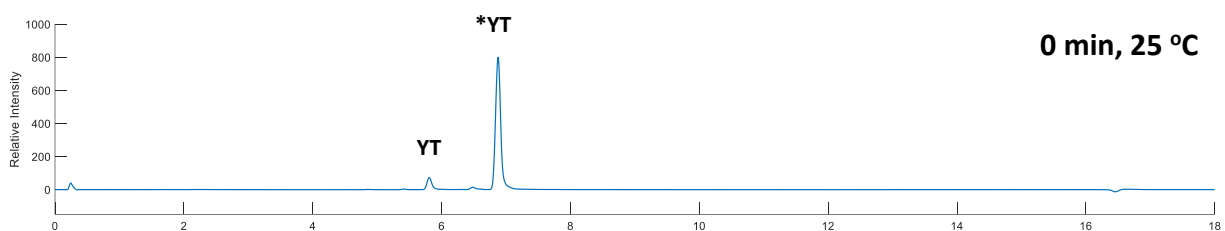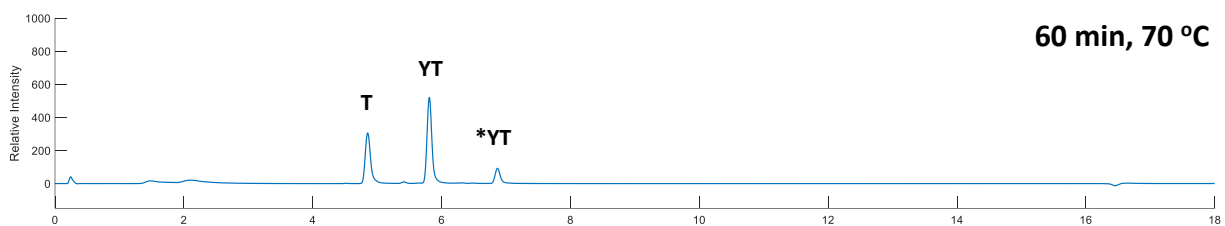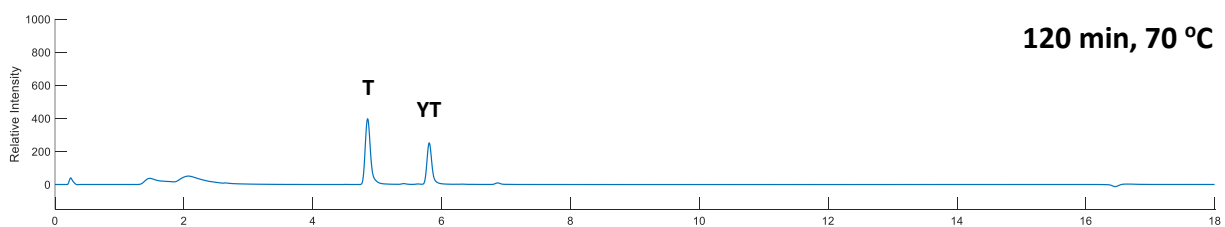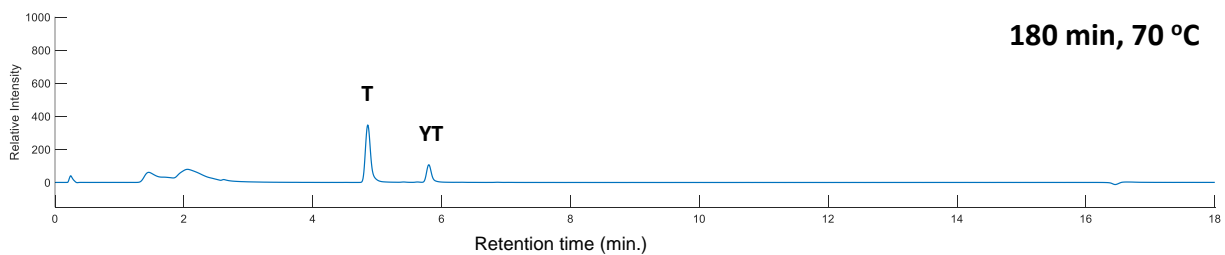

After 60 minutes of sequencing, all the following molecules are observed in the solution and analyzed via High-Res MS.

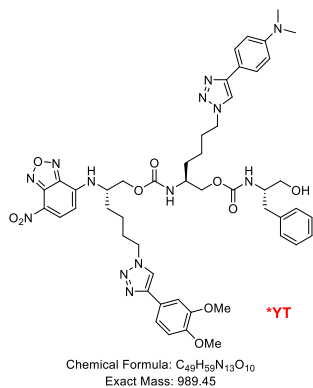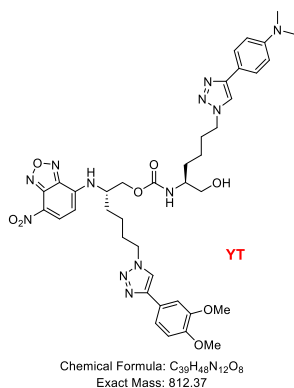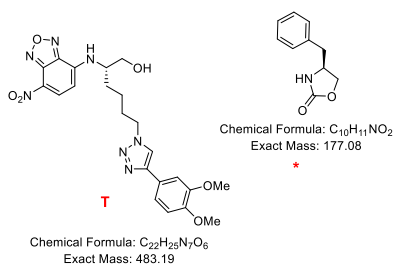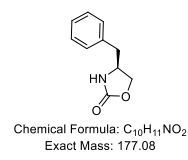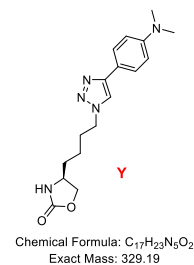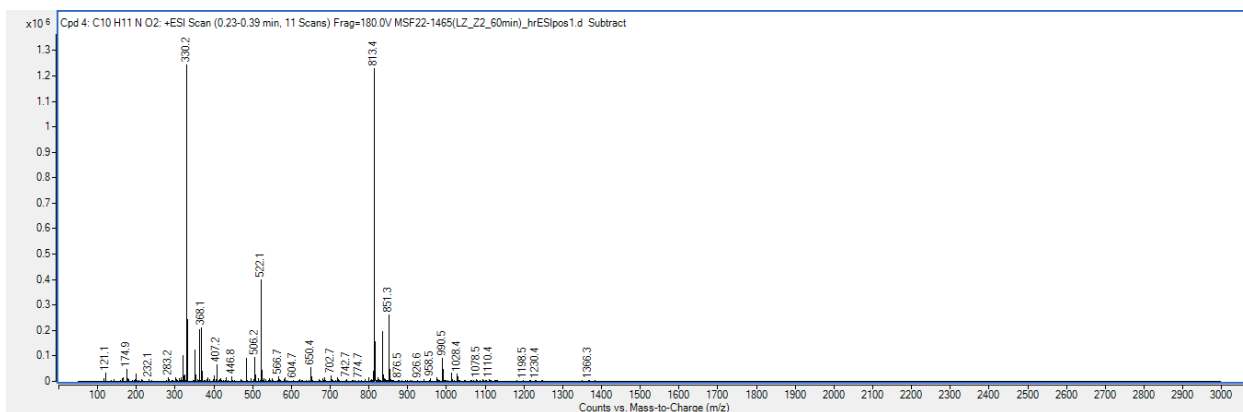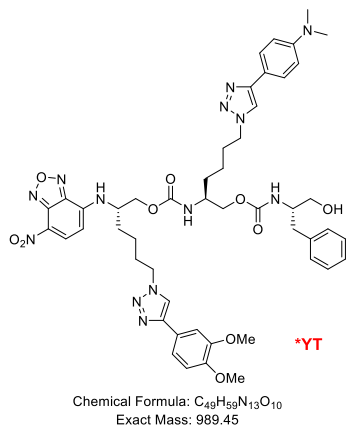

MS Zoomed Spectrum

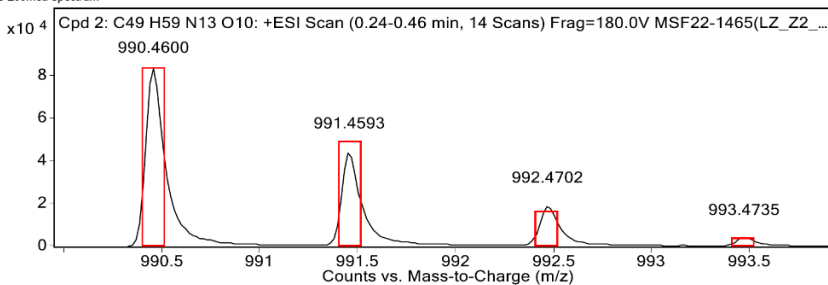

MS Spectrum Peak List

| Obs. m/z | Calc. m/z | Charge | Abundance | Formula                                                         | Ion Species        | Tgt Mass Error (ppm) |
|----------|-----------|--------|-----------|-----------------------------------------------------------------|--------------------|----------------------|
| 813.3784 |           |        | 1139089   |                                                                 |                    |                      |
| 990.4600 | 990.4581  | 1      | 83810     | C <sub>49</sub> H <sub>59</sub> N <sub>13</sub> O <sub>10</sub> | (M+H) <sup>+</sup> | -1.93                |
| 991.4593 | 991.4609  | 1      | 44582     | C <sub>49</sub> H <sub>59</sub> N <sub>13</sub> O <sub>10</sub> | (M+H) <sup>+</sup> | 1.68                 |
| 992.4702 | 992.4637  | 1      | 19087     | C <sub>49</sub> H <sub>59</sub> N <sub>13</sub> O <sub>10</sub> | (M+H) <sup>+</sup> | -6.6                 |
| 993.4735 | 993.4663  | 1      | 3922      | C <sub>49</sub> H <sub>59</sub> N <sub>13</sub> O <sub>10</sub> | (M+H) <sup>+</sup> | -7.26                |

--- End Of Report ---

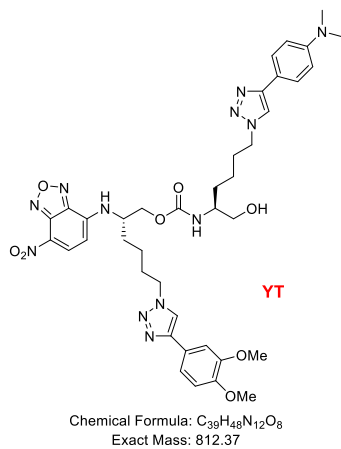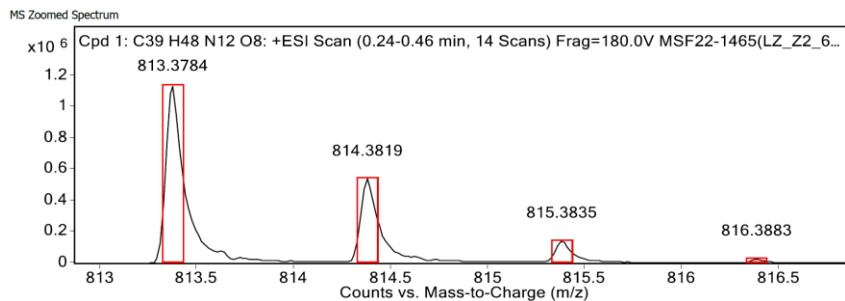

| Obs. m/z | Calc. m/z | Charge | Abundance | Formula                                                        | Ion Species        | Tgt Mass Error (ppm) |
|----------|-----------|--------|-----------|----------------------------------------------------------------|--------------------|----------------------|
| 813.3784 | 813.3791  | 1      | 1139112   | C <sub>39</sub> H <sub>48</sub> N <sub>12</sub> O <sub>8</sub> | (M+H) <sup>+</sup> | 0.8                  |
| 814.3819 | 814.3819  | 1      | 538590    | C <sub>39</sub> H <sub>48</sub> N <sub>12</sub> O <sub>8</sub> | (M+H) <sup>+</sup> | 0.02                 |
| 815.3835 | 815.3845  | 1      | 142767    | C <sub>39</sub> H <sub>48</sub> N <sub>12</sub> O <sub>8</sub> | (M+H) <sup>+</sup> | 1.23                 |
| 816.3883 | 816.3870  | 1      | 28719     | C <sub>39</sub> H <sub>48</sub> N <sub>12</sub> O <sub>8</sub> | (M+H) <sup>+</sup> | -1.52                |
| 817.3810 | 817.3895  | 1      | 4115      | C <sub>39</sub> H <sub>48</sub> N <sub>12</sub> O <sub>8</sub> | (M+H) <sup>+</sup> | 10.47                |
| 818.3698 | 818.3920  | 1      | 824       | C <sub>39</sub> H <sub>48</sub> N <sub>12</sub> O <sub>8</sub> | (M+H) <sup>+</sup> | 27.06                |

--- End Of Report ---

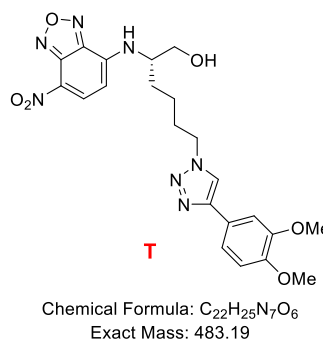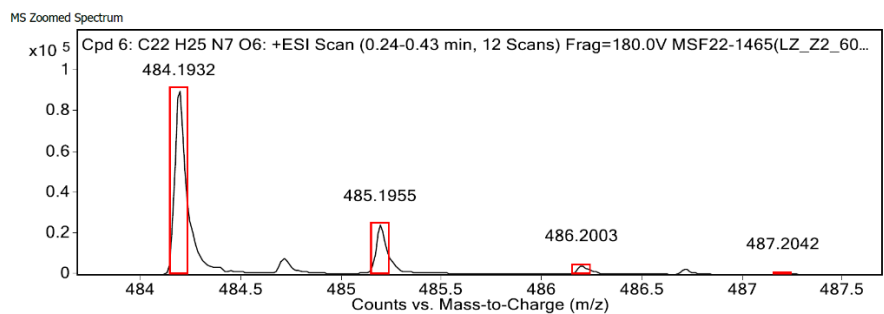

| Obs. m/z | Calc. m/z | Charge | Abundance | Formula                                                       | Ion Species        | Tgt Mass Error (ppm) |
|----------|-----------|--------|-----------|---------------------------------------------------------------|--------------------|----------------------|
| 484.1932 | 484.1939  | 1      | 91353     | C <sub>22</sub> H <sub>25</sub> N <sub>7</sub> O <sub>6</sub> | (M+H) <sup>+</sup> | 1.52                 |
| 485.1955 | 485.1967  | 1      | 24078     | C <sub>22</sub> H <sub>25</sub> N <sub>7</sub> O <sub>6</sub> | (M+H) <sup>+</sup> | 2.39                 |
| 486.2003 | 486.1991  | 1      | 4524      | C <sub>22</sub> H <sub>25</sub> N <sub>7</sub> O <sub>6</sub> | (M+H) <sup>+</sup> | -2.47                |
| 487.2042 | 487.2015  | 1      | 632       | C <sub>22</sub> H <sub>25</sub> N <sub>7</sub> O <sub>6</sub> | (M+H) <sup>+</sup> | -5.38                |
| 813.3784 |           |        | 1274478   |                                                               |                    |                      |

--- End Of Report ---

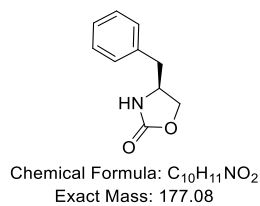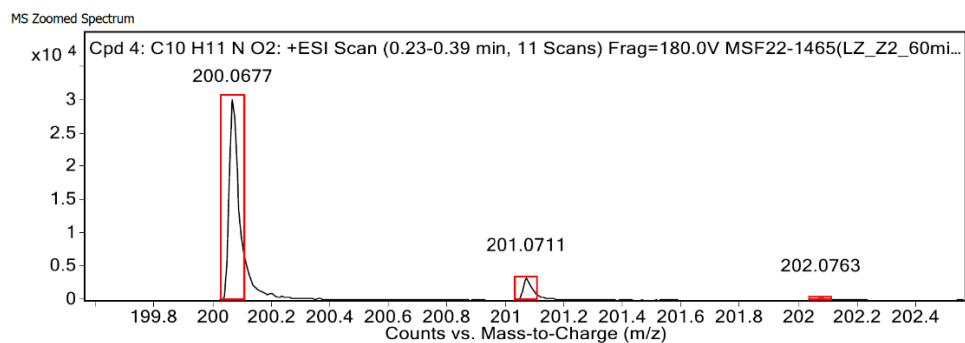

| Obs. m/z | Calc. m/z | Charge | Abundance | Formula                                         | Ion Species         | Tgt Mass Error (ppm) |
|----------|-----------|--------|-----------|-------------------------------------------------|---------------------|----------------------|
| 200.0677 | 200.0682  | 1      | 30751     | C <sub>10</sub> H <sub>11</sub> NO <sub>2</sub> | (M+Na) <sup>+</sup> | 2.41                 |
| 201.0711 | 201.0714  | 1      | 3465      | C <sub>10</sub> H <sub>11</sub> NO <sub>2</sub> | (M+Na) <sup>+</sup> | 1.55                 |
| 202.0763 | 202.0737  | 1      | 382       | C <sub>10</sub> H <sub>11</sub> NO <sub>2</sub> | (M+Na) <sup>+</sup> | -12.94               |
| 330.1922 |           |        | 1253860   |                                                 |                     |                      |

--- End Of Report ---

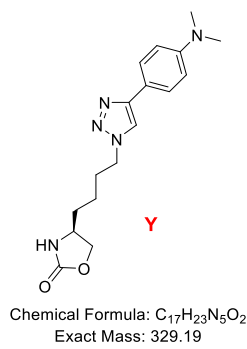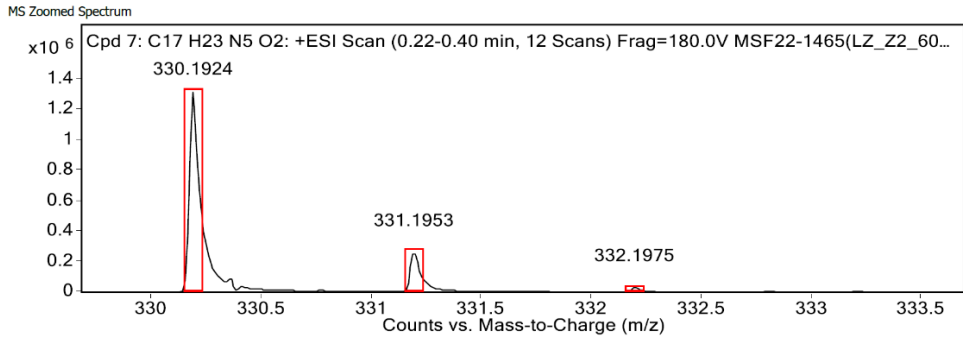

MS Spectrum Peak List

| Obs. m/z | Calc. m/z | Charge | Abundance | Formula                                                       | Ion Species        | Ygt Mass Error (ppm) |
|----------|-----------|--------|-----------|---------------------------------------------------------------|--------------------|----------------------|
| 330.1924 | 330.1925  | 1      | 1327937   | C <sub>17</sub> H <sub>23</sub> N <sub>5</sub> O <sub>2</sub> | (M+H) <sup>+</sup> | 0.13                 |
| 331.1953 | 331.1953  | 1      | 263087    | C <sub>17</sub> H <sub>23</sub> N <sub>5</sub> O <sub>2</sub> | (M+H) <sup>+</sup> | -0.15                |
| 332.1975 | 332.1979  | 1      | 29321     | C <sub>17</sub> H <sub>23</sub> N <sub>5</sub> O <sub>2</sub> | (M+H) <sup>+</sup> | 0.98                 |
| 813.3784 |           |        | 1360110   |                                                               |                    |                      |

--- End Of Report ---

**Oligomer Z3: \*umc**

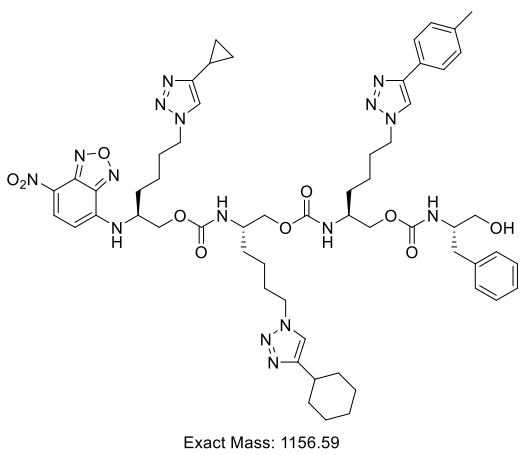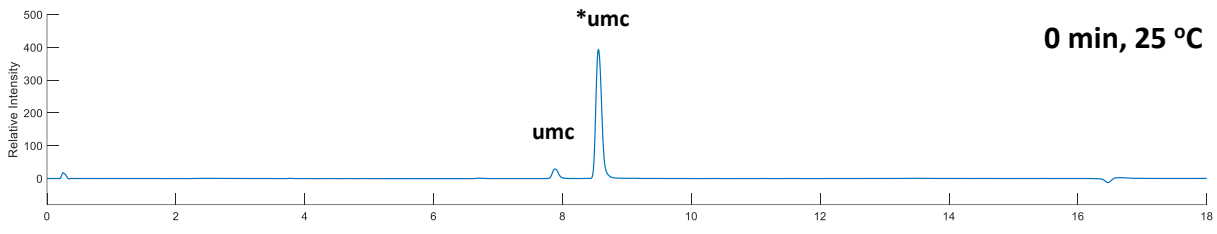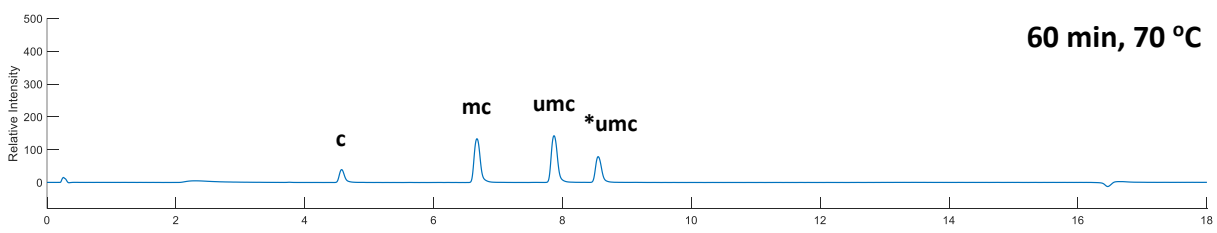

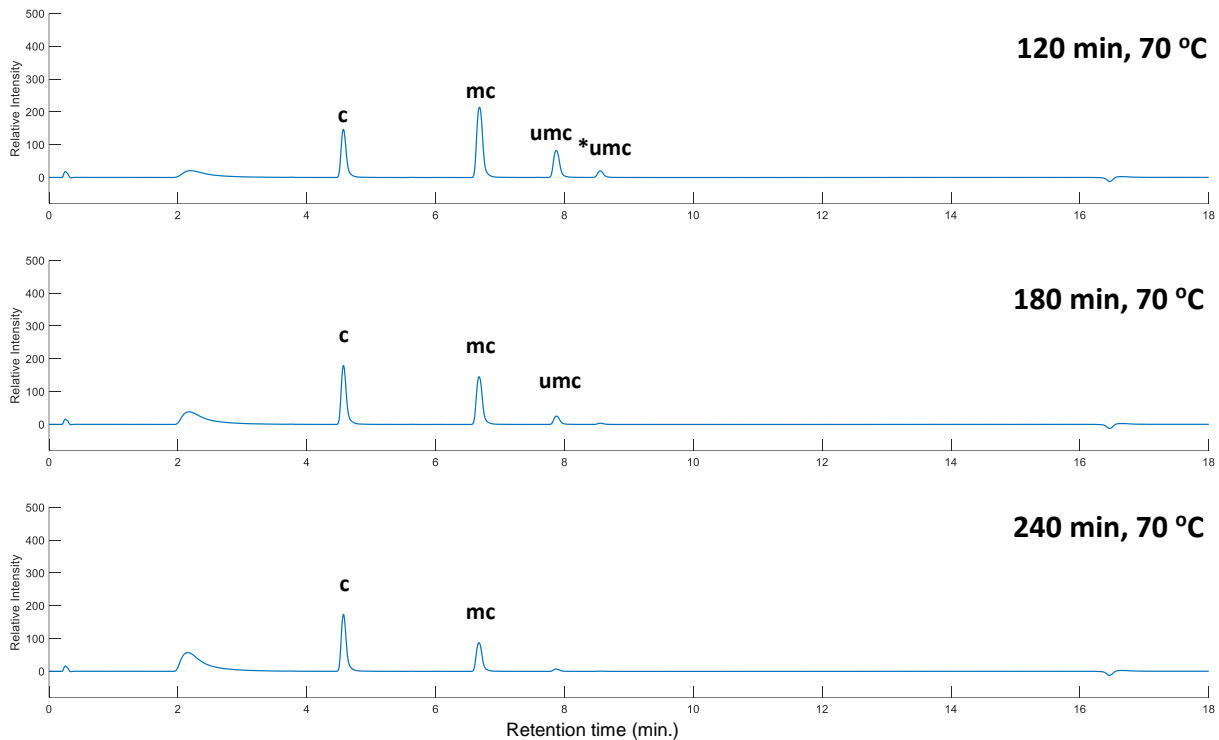

After 60 minutes of sequencing, all the following molecules are observed in the solution and analyzed via High-Res MS.

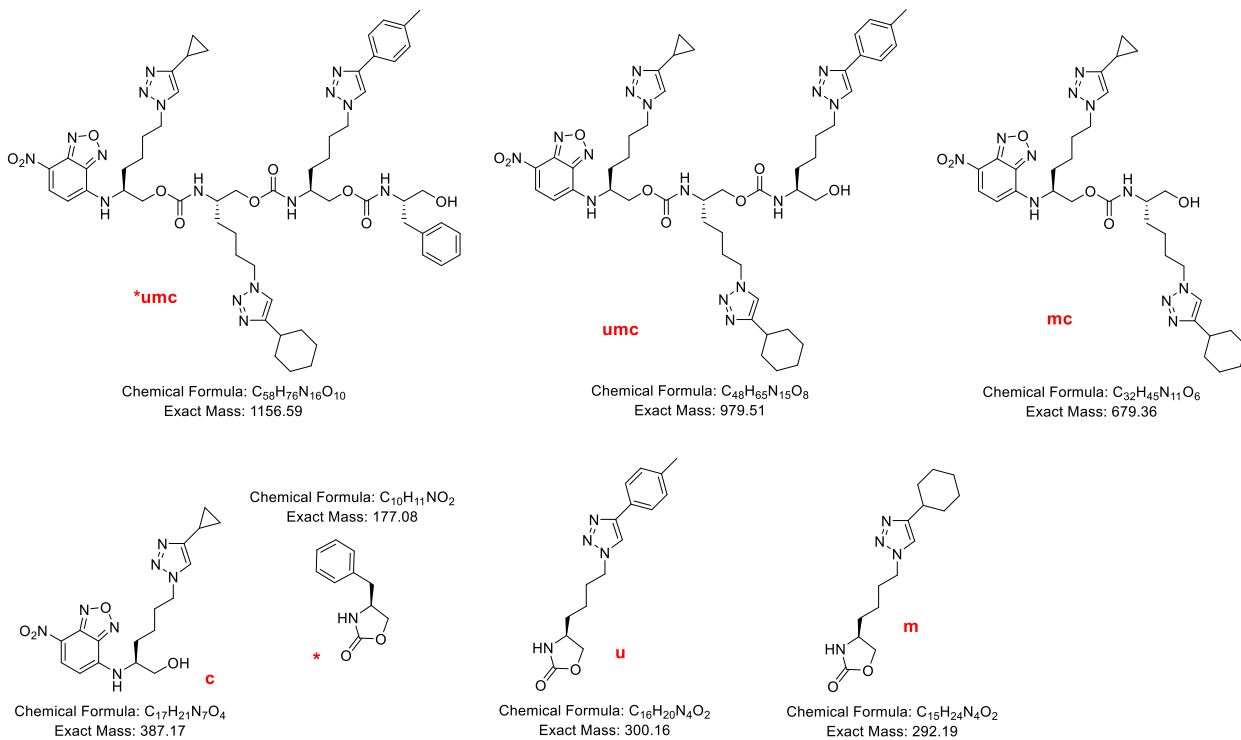

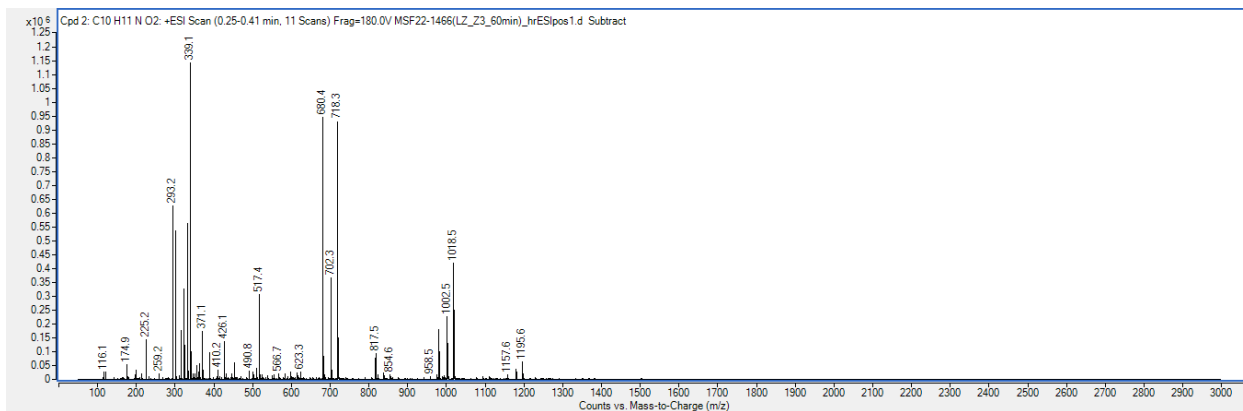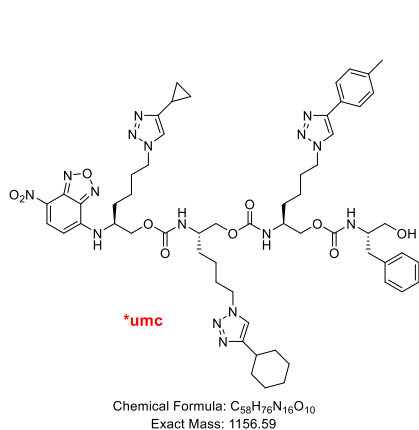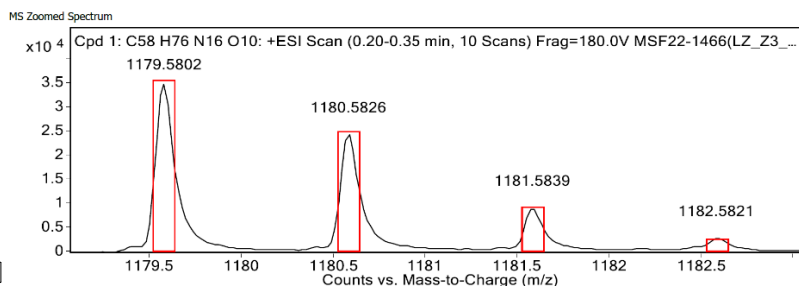

MS Spectrum Peak List

| Obs. m/z  | Calc. m/z | Charge | Abundance | Formula      | Ion Species | Tgt Mass Error (ppm) |
|-----------|-----------|--------|-----------|--------------|-------------|----------------------|
| 339.1217  |           |        | 1248861   |              |             |                      |
| 1179.5802 | 1179.5823 | 1      | 34878     | C58H76N16O10 | (M+Na)+     | 1.74                 |
| 1180.5826 | 1180.5851 | 1      | 24409     | C58H76N16O10 | (M+Na)+     | 2.14                 |
| 1181.5839 | 1181.5879 | 1      | 9213      | C58H76N16O10 | (M+Na)+     | 3.39                 |
| 1182.5821 | 1182.5905 | 1      | 2914      | C58H76N16O10 | (M+Na)+     | 7.1                  |
| 1183.5960 | 1183.5931 | 1      | 772       | C58H76N16O10 | (M+Na)+     | -2.43                |

--- End of Report ---

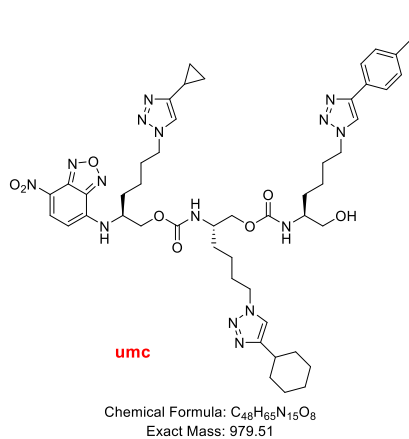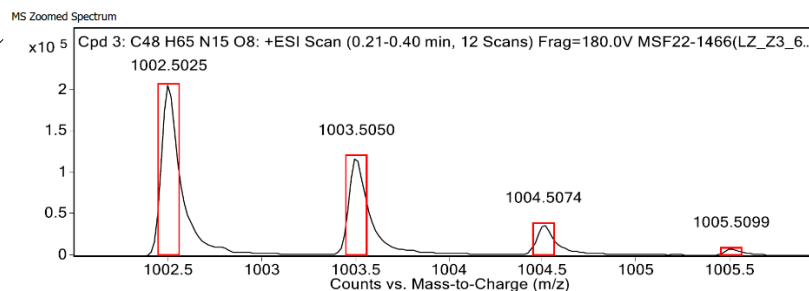

MS Spectrum Peak List

| Obs. m/z  | Calc. m/z | Charge | Abundance | Formula     | Ion Species | Tgt Mass Error (ppm) |
|-----------|-----------|--------|-----------|-------------|-------------|----------------------|
| 339.1217  |           |        | 955617    |             |             |                      |
| 1002.5025 | 1002.5033 | 1      | 207380    | C48H65N15O8 | (M+Na)+     | 0.75                 |
| 1003.5050 | 1003.5061 | 1      | 119381    | C48H65N15O8 | (M+Na)+     | 1.11                 |
| 1004.5074 | 1004.5088 | 1      | 37382     | C48H65N15O8 | (M+Na)+     | 1.37                 |
| 1005.5099 | 1005.5113 | 1      | 7696      | C48H65N15O8 | (M+Na)+     | 1.47                 |
| 1006.5170 | 1006.5139 | 1      | 1636      | C48H65N15O8 | (M+Na)+     | -3.09                |

--- End of Report ---

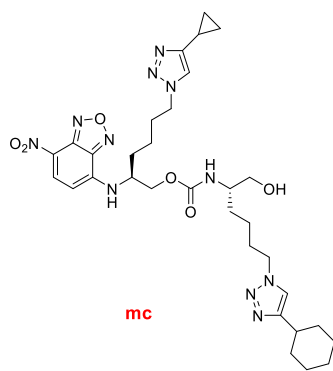

**mc**  
 Chemical Formula: C<sub>32</sub>H<sub>45</sub>N<sub>11</sub>O<sub>6</sub>  
 Exact Mass: 679.36

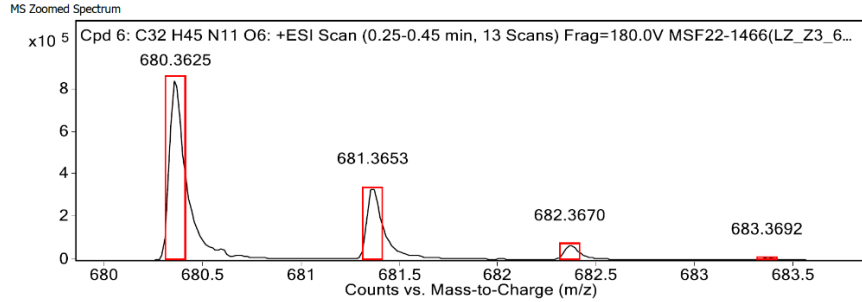

MS Spectrum Peak List

| Obs. m/z | Calc. m/z | Charge | Abundance | Formula                                                        | Ion Species        | Tgt Mass Error (ppm) |
|----------|-----------|--------|-----------|----------------------------------------------------------------|--------------------|----------------------|
| 339.1218 |           |        | 1143050   |                                                                |                    |                      |
| 680.3625 | 680.3627  | 1      | 858821    | C <sub>32</sub> H <sub>45</sub> N <sub>11</sub> O <sub>6</sub> | (M+H) <sup>+</sup> | 0.34                 |
| 681.3653 | 681.3655  | 1      | 341434    | C <sub>32</sub> H <sub>45</sub> N <sub>11</sub> O <sub>6</sub> | (M+H) <sup>+</sup> | 0.23                 |
| 682.3670 | 682.3680  | 1      | 74733     | C <sub>32</sub> H <sub>45</sub> N <sub>11</sub> O <sub>6</sub> | (M+H) <sup>+</sup> | 1.5                  |
| 683.3692 | 683.3705  | 1      | 11149     | C <sub>32</sub> H <sub>45</sub> N <sub>11</sub> O <sub>6</sub> | (M+H) <sup>+</sup> | 1.88                 |
| 684.3711 | 684.3729  | 1      | 1753      | C <sub>32</sub> H <sub>45</sub> N <sub>11</sub> O <sub>6</sub> | (M+H) <sup>+</sup> | 2.72                 |

--- End Of Report ---

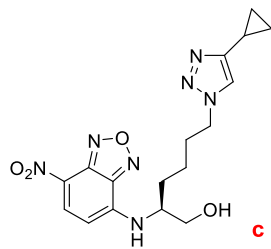

**C**  
 Chemical Formula: C<sub>17</sub>H<sub>21</sub>N<sub>7</sub>O<sub>4</sub>  
 Exact Mass: 387.17

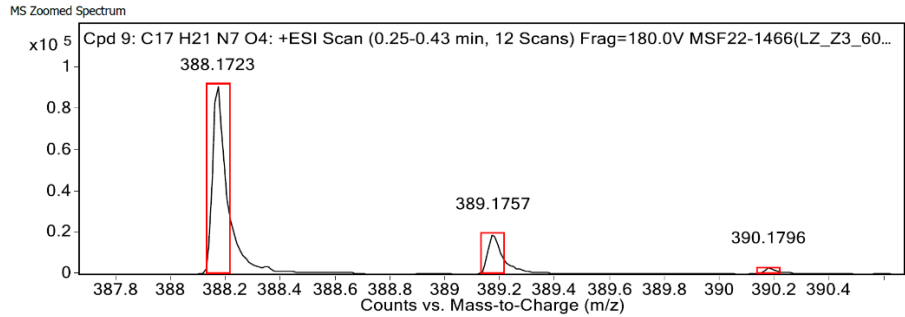

MS Spectrum Peak List

| Obs. m/z | Calc. m/z | Charge | Abundance | Formula                                                       | Ion Species        | Tgt Mass Error (ppm) |
|----------|-----------|--------|-----------|---------------------------------------------------------------|--------------------|----------------------|
| 339.1218 |           |        | 1172686   |                                                               |                    |                      |
| 388.1723 | 388.1728  | 1      | 91609     | C <sub>17</sub> H <sub>21</sub> N <sub>7</sub> O <sub>4</sub> | (M+H) <sup>+</sup> | 1.27                 |
| 389.1757 | 389.1754  | 1      | 19532     | C <sub>17</sub> H <sub>21</sub> N <sub>7</sub> O <sub>4</sub> | (M+H) <sup>+</sup> | -0.81                |
| 390.1796 | 390.1777  | 1      | 3009      | C <sub>17</sub> H <sub>21</sub> N <sub>7</sub> O <sub>4</sub> | (M+H) <sup>+</sup> | -4.64                |

--- End Of Report ---

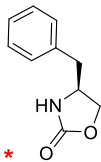

**\***  
 Chemical Formula: C<sub>10</sub>H<sub>11</sub>NO<sub>2</sub>  
 Exact Mass: 177.08

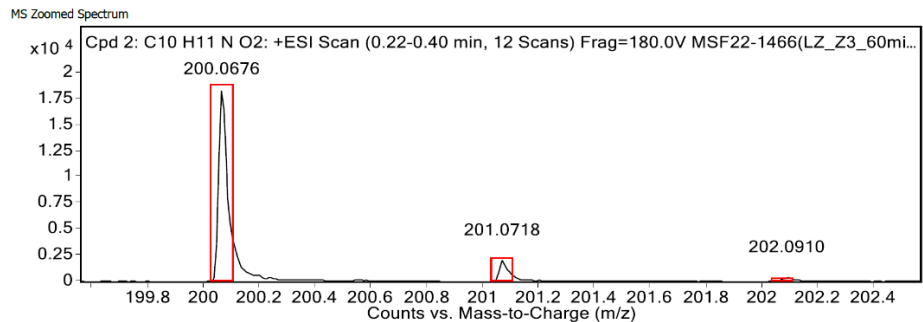

MS Spectrum Peak List

| Obs. m/z | Calc. m/z | Charge | Abundance | Formula                                         | Ion Species         | Tgt Mass Error (ppm) |
|----------|-----------|--------|-----------|-------------------------------------------------|---------------------|----------------------|
| 200.0676 | 200.0682  | 1      | 18592     | C <sub>10</sub> H <sub>11</sub> NO <sub>2</sub> | (M+Na) <sup>+</sup> | 2.95                 |
| 201.0718 | 201.0714  | 1      | 2041      | C <sub>10</sub> H <sub>11</sub> NO <sub>2</sub> | (M+Na) <sup>+</sup> | -1.88                |
| 202.0910 | 202.0737  | 1      | 414       | C <sub>10</sub> H <sub>11</sub> NO <sub>2</sub> | (M+Na) <sup>+</sup> | -85.41               |
| 339.1217 |           |        | 1652829   |                                                 |                     |                      |

--- End Of Report ---

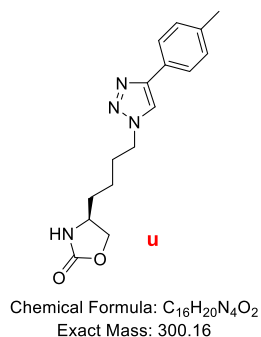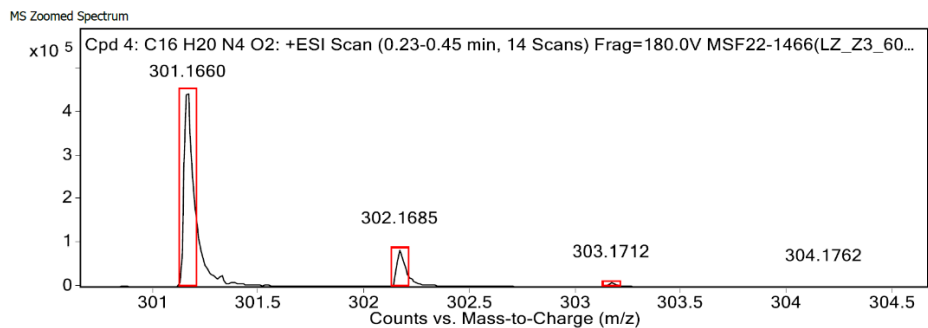

MS Spectrum Peak List

| Obs. m/z | Calc. m/z | Charge | Abundance | Formula              | Ion Species        | Tgt Mass Error (ppm) |
|----------|-----------|--------|-----------|----------------------|--------------------|----------------------|
| 301.1660 | 301.1659  | 1      | 452094    | $C_{16}H_{20}N_4O_2$ | (M+H) <sup>+</sup> | -0.47                |
| 302.1685 | 302.1688  | 1      | 85743     | $C_{16}H_{20}N_4O_2$ | (M+H) <sup>+</sup> | 0.99                 |
| 303.1712 | 303.1714  | 1      | 9452      | $C_{16}H_{20}N_4O_2$ | (M+H) <sup>+</sup> | 0.69                 |
| 304.1762 | 304.1739  | 1      | 828       | $C_{16}H_{20}N_4O_2$ | (M+H) <sup>+</sup> | -7.61                |
| 339.1218 |           |        | 1080400   |                      |                    |                      |

--- End Of Report ---

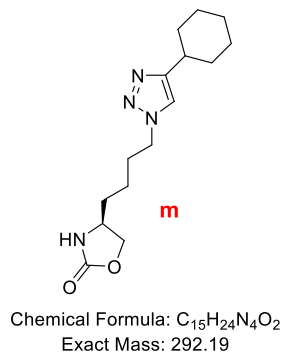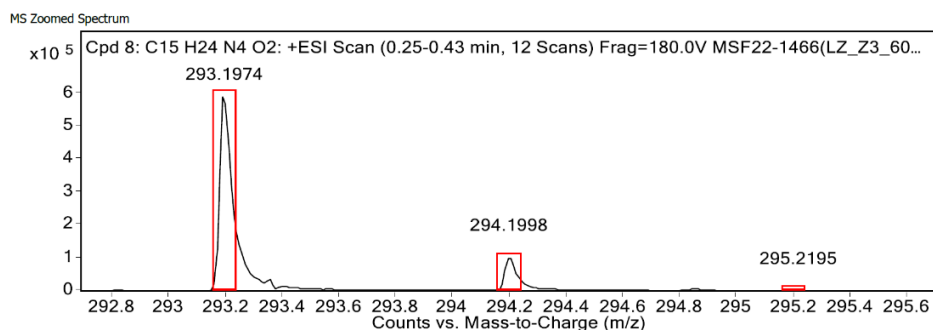

MS Spectrum Peak List

| Obs. m/z | Calc. m/z | Charge | Abundance | Formula              | Ion Species        | Tgt Mass Error (ppm) |
|----------|-----------|--------|-----------|----------------------|--------------------|----------------------|
| 293.1974 | 293.1972  | 1      | 607055    | $C_{15}H_{24}N_4O_2$ | (M+H) <sup>+</sup> | -0.74                |
| 294.1998 | 294.2001  | 1      | 104470    | $C_{15}H_{24}N_4O_2$ | (M+H) <sup>+</sup> | 1.04                 |
| 295.2195 | 295.2026  | 1      | 3072      | $C_{15}H_{24}N_4O_2$ | (M+H) <sup>+</sup> | -56.96               |
| 339.1218 |           |        | 1178658   |                      |                    |                      |

--- End Of Report ---

Oligomer Z4: \*pdw

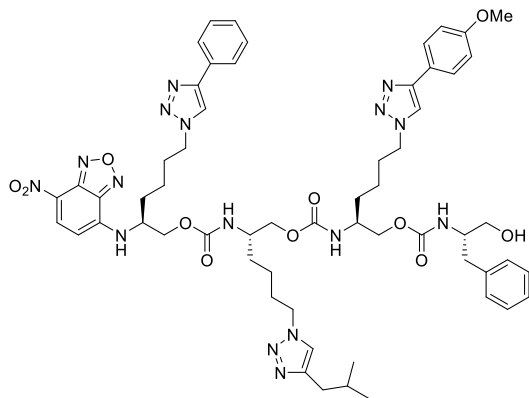

Exact Mass: 1182.57

\*pdw



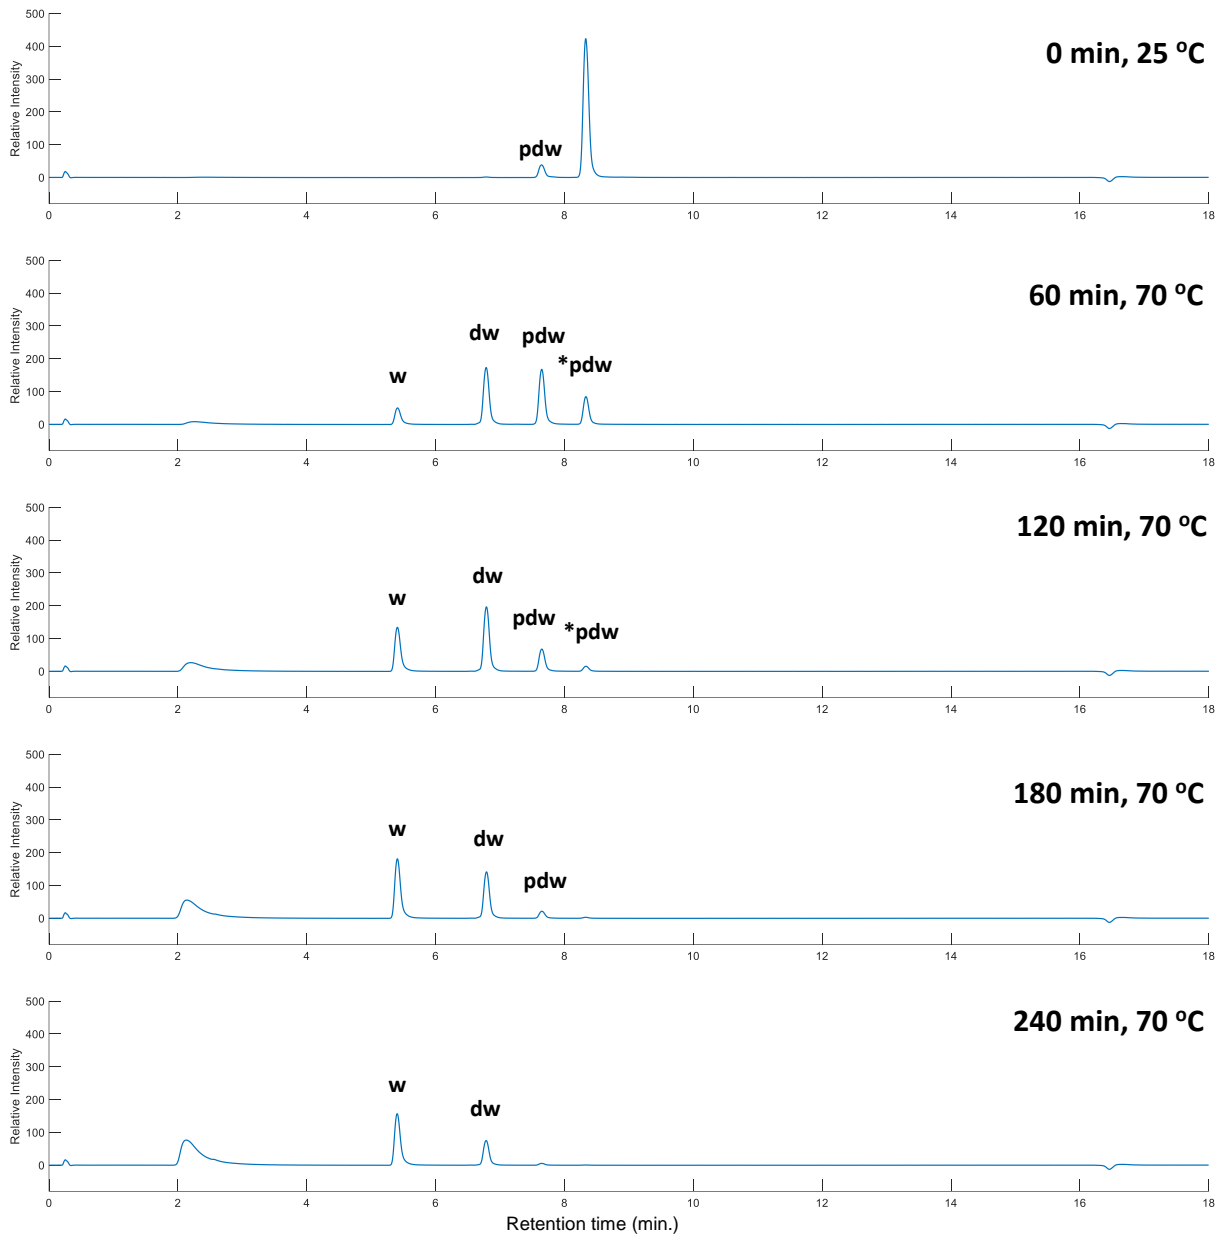

After 60 minutes of sequencing, all the following molecules are observed in the solution and analyzed via High-Res MS.

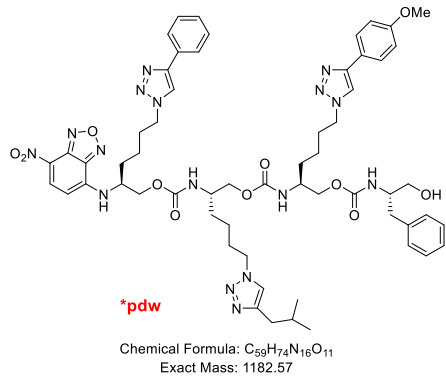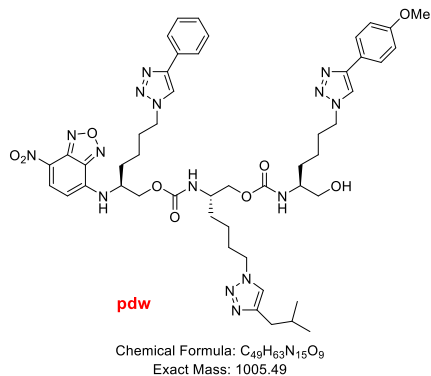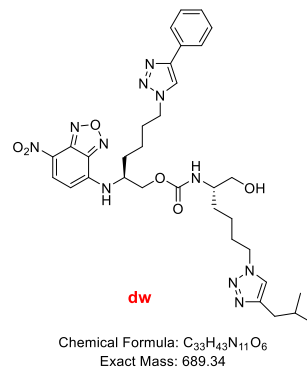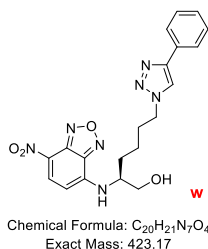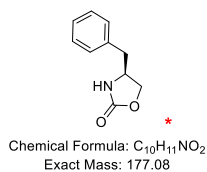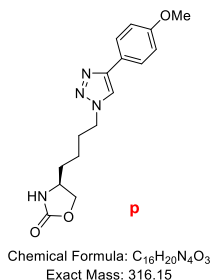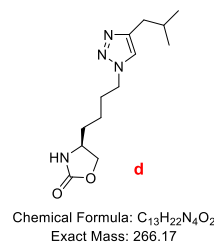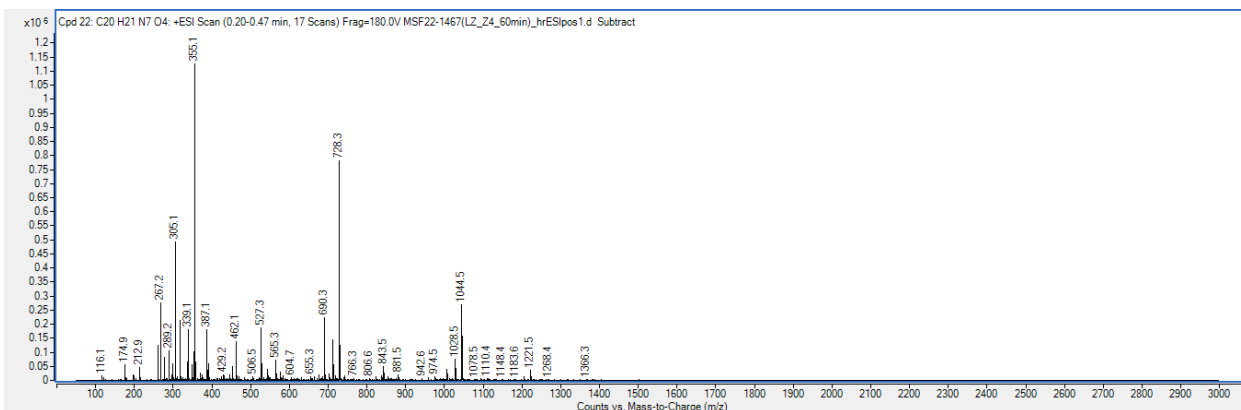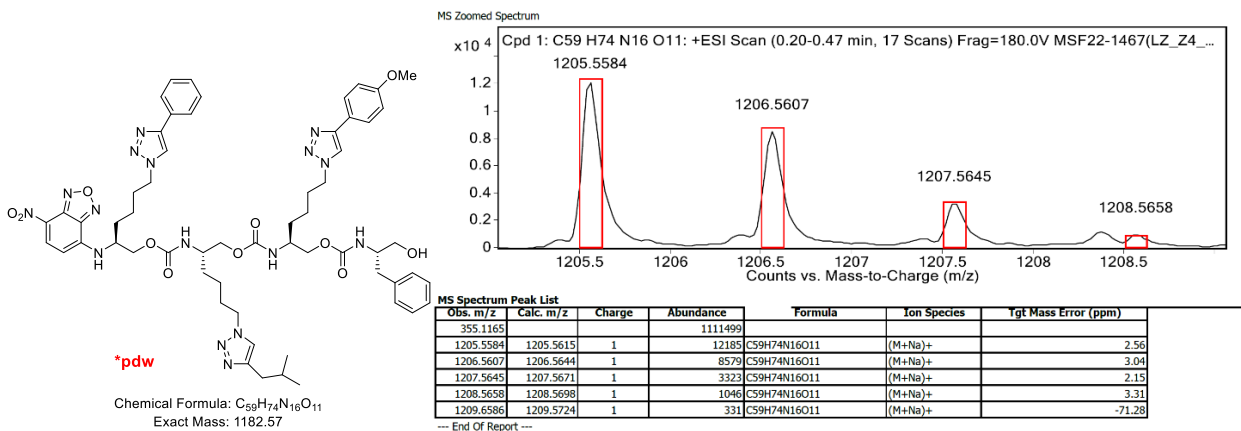

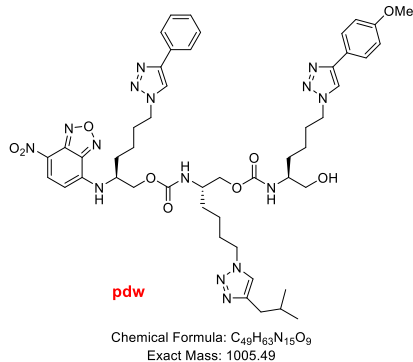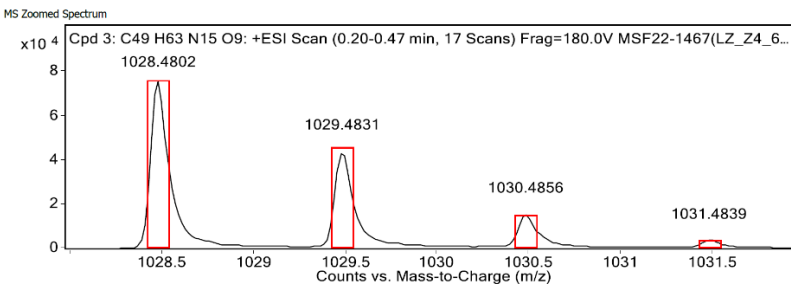

MS Spectrum Peak List

| Obs. m/z  | Calc. m/z | Charge | Abundance | Formula                                                        | Ion Species         | Tgt Mass Error (ppm) |
|-----------|-----------|--------|-----------|----------------------------------------------------------------|---------------------|----------------------|
| 355.1165  |           |        | 1124680   |                                                                |                     |                      |
| 1028.4802 | 1028.4825 | 1      | 75801     | C <sub>49</sub> H <sub>63</sub> N <sub>15</sub> O <sub>9</sub> | (M+Na) <sup>+</sup> | 2.23                 |
| 1029.4831 | 1029.4854 | 1      | 43996     | C <sub>49</sub> H <sub>63</sub> N <sub>15</sub> O <sub>9</sub> | (M+Na) <sup>+</sup> | 2.17                 |
| 1030.4856 | 1030.4880 | 1      | 15425     | C <sub>49</sub> H <sub>63</sub> N <sub>15</sub> O <sub>9</sub> | (M+Na) <sup>+</sup> | 2.35                 |
| 1031.4839 | 1031.4906 | 1      | 3558      | C <sub>49</sub> H <sub>63</sub> N <sub>15</sub> O <sub>9</sub> | (M+Na) <sup>+</sup> | 6.54                 |

--- End Of Report ---

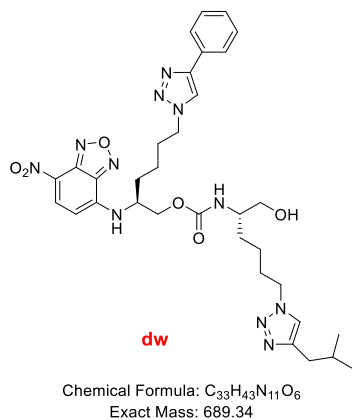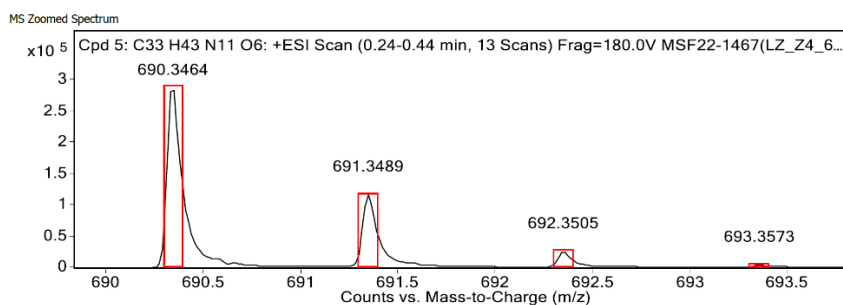

MS Spectrum Peak List

| Obs. m/z | Calc. m/z | Charge | Abundance | Formula                                                        | Ion Species        | Tgt Mass Error (ppm) |
|----------|-----------|--------|-----------|----------------------------------------------------------------|--------------------|----------------------|
| 355.1164 |           |        | 1347538   |                                                                |                    |                      |
| 690.3464 | 690.3471  | 1      | 289473    | C <sub>33</sub> H <sub>43</sub> N <sub>11</sub> O <sub>6</sub> | (M+H) <sup>+</sup> | 0.92                 |
| 691.3489 | 691.3498  | 1      | 116937    | C <sub>33</sub> H <sub>43</sub> N <sub>11</sub> O <sub>6</sub> | (M+H) <sup>+</sup> | 1.4                  |
| 692.3505 | 692.3524  | 1      | 25994     | C <sub>33</sub> H <sub>43</sub> N <sub>11</sub> O <sub>6</sub> | (M+H) <sup>+</sup> | 2.7                  |
| 693.3573 | 693.3549  | 1      | 4339      | C <sub>33</sub> H <sub>43</sub> N <sub>11</sub> O <sub>6</sub> | (M+H) <sup>+</sup> | -3.5                 |
| 694.4222 | 694.3574  | 1      | 1039      | C <sub>33</sub> H <sub>43</sub> N <sub>11</sub> O <sub>6</sub> | (M+H) <sup>+</sup> | -93.42               |

--- End Of Report ---

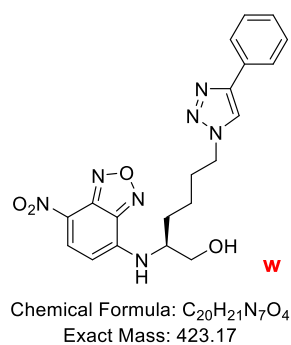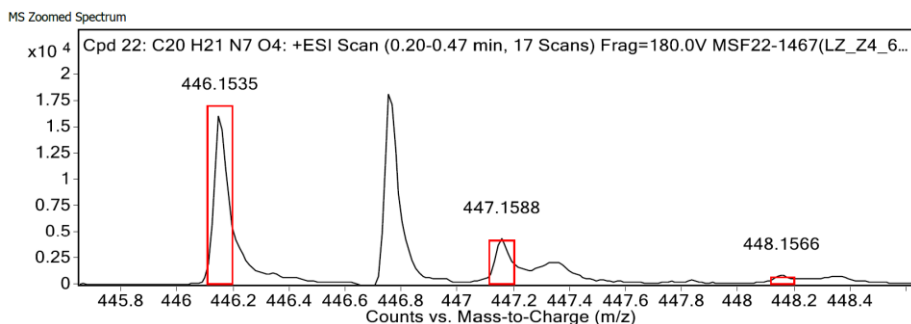

MS Spectrum Peak List

| Obs. m/z | Calc. m/z | Charge | Abundance | Formula                                                       | Ion Species         | Tgt Mass Error (ppm) |
|----------|-----------|--------|-----------|---------------------------------------------------------------|---------------------|----------------------|
| 355.1165 |           |        | 1136338   |                                                               |                     |                      |
| 446.1535 | 446.1547  | 1      | 16223     | C <sub>20</sub> H <sub>21</sub> N <sub>7</sub> O <sub>4</sub> | (M+Na) <sup>+</sup> | 2.78                 |
| 447.1588 | 447.1575  | 1      | 4480      | C <sub>20</sub> H <sub>21</sub> N <sub>7</sub> O <sub>4</sub> | (M+Na) <sup>+</sup> | -2.93                |
| 448.1566 | 448.1599  | 1      | 978       | C <sub>20</sub> H <sub>21</sub> N <sub>7</sub> O <sub>4</sub> | (M+Na) <sup>+</sup> | 7.33                 |

--- End Of Report ---

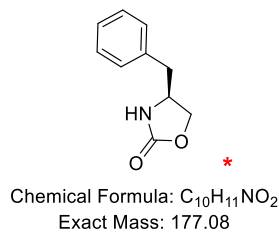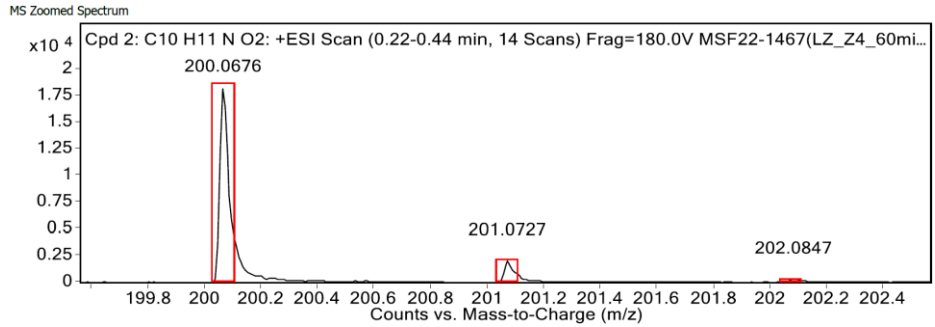

MS Spectrum Peak List

| Obs. m/z | Calc. m/z | Charge | Abundance | Formula            | Ion Species | Tgt Mass Error (ppm) |
|----------|-----------|--------|-----------|--------------------|-------------|----------------------|
| 200.0676 | 200.0682  | 1      | 18515     | $C_{10}H_{11}NO_2$ | (M+Na)+     | 2.84                 |
| 201.0727 | 201.0714  | 1      | 2042      | $C_{10}H_{11}NO_2$ | (M+Na)+     | -6.72                |
| 202.0847 | 202.0737  | 1      | 328       | $C_{10}H_{11}NO_2$ | (M+Na)+     | -54.36               |
| 355.1164 |           |        | 1249394   |                    |             |                      |

--- End Of Report ---

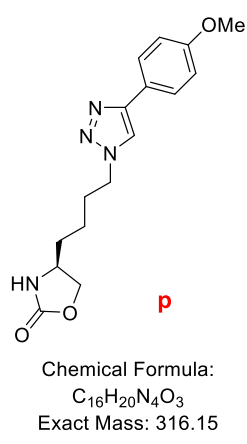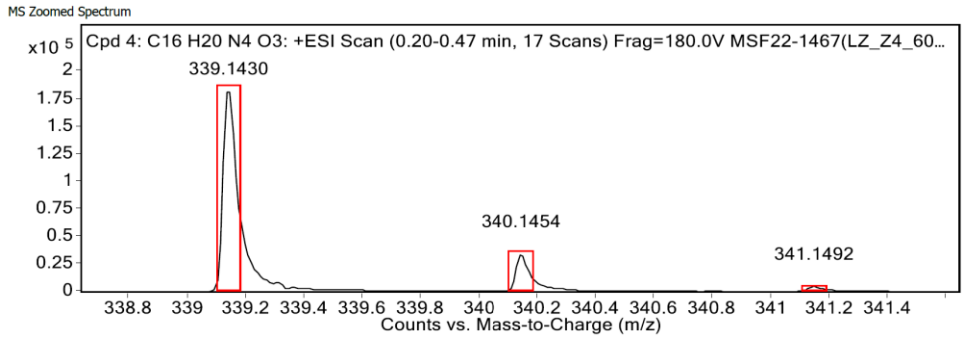

MS Spectrum Peak List

| Obs. m/z | Calc. m/z | Charge | Abundance | Formula              | Ion Species | Tgt Mass Error (ppm) |
|----------|-----------|--------|-----------|----------------------|-------------|----------------------|
| 339.1430 | 339.1428  | 1      | 185836    | $C_{16}H_{20}N_4O_3$ | (M+Na)+     | -0.63                |
| 340.1454 | 340.1457  | 1      | 34678     | $C_{16}H_{20}N_4O_3$ | (M+Na)+     | 0.74                 |
| 341.1492 | 341.1481  | 1      | 5105      | $C_{16}H_{20}N_4O_3$ | (M+Na)+     | -3.15                |
| 342.1561 | 342.1506  | 1      | 694       | $C_{16}H_{20}N_4O_3$ | (M+Na)+     | -16.18               |
| 355.1165 |           |        | 1126090   |                      |             |                      |

--- End Of Report ---

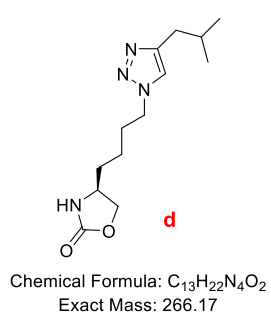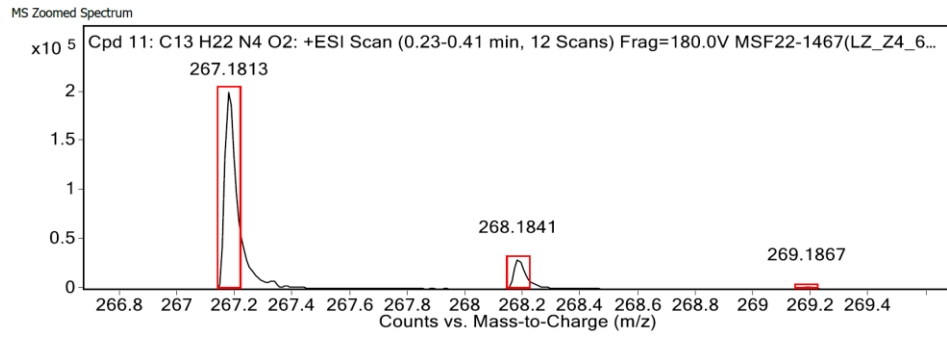

MS Spectrum Peak List

| Obs. m/z | Calc. m/z | Charge | Abundance | Formula              | Ion Species | Tgt Mass Error (ppm) |
|----------|-----------|--------|-----------|----------------------|-------------|----------------------|
| 267.1813 | 267.1816  | 1      | 204025    | $C_{13}H_{22}N_4O_2$ | (M+H)+      | 0.81                 |
| 268.1841 | 268.1844  | 1      | 30711     | $C_{13}H_{22}N_4O_2$ | (M+H)+      | 0.9                  |
| 269.1867 | 269.1868  | 1      | 2803      | $C_{13}H_{22}N_4O_2$ | (M+H)+      | 0.55                 |
| 270.1926 | 270.1892  | 1      | 295       | $C_{13}H_{22}N_4O_2$ | (M+H)+      | -12.45               |
| 355.1164 |           |        | 2138946   |                      |             |                      |

--- End Of Report ---

Oligomer Z5\_1: \*flvv

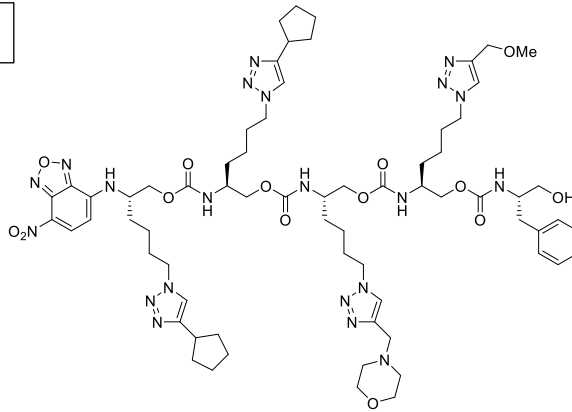

Exact Mass: 1433.77

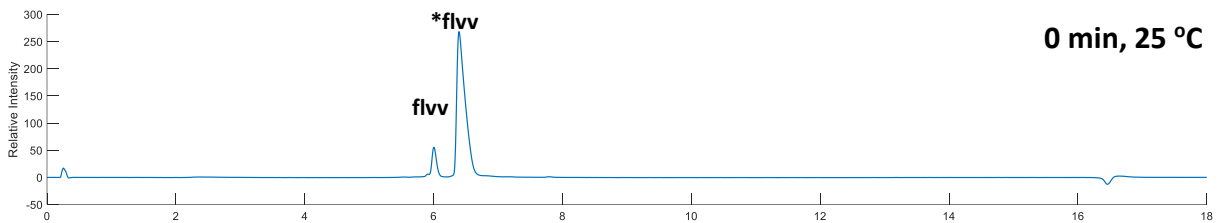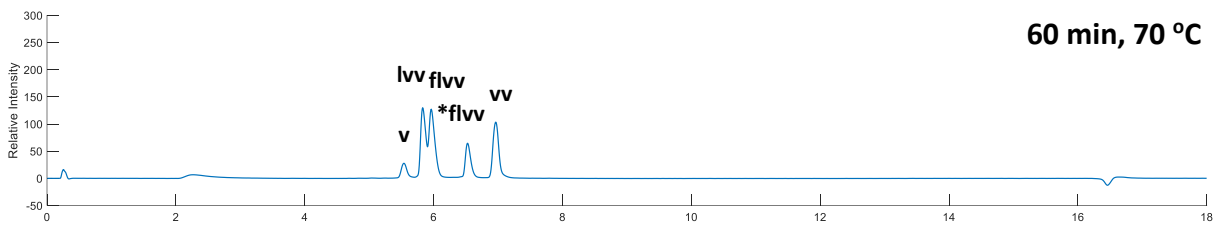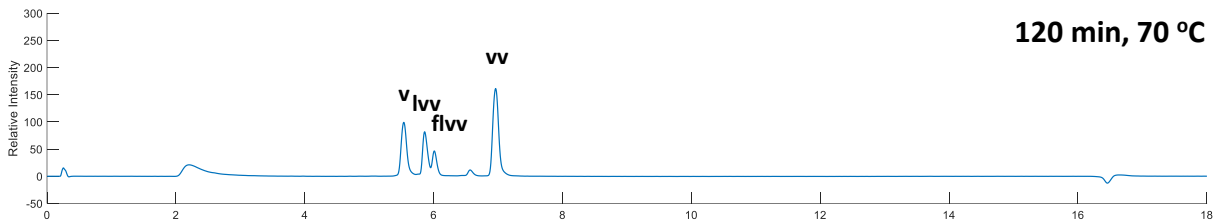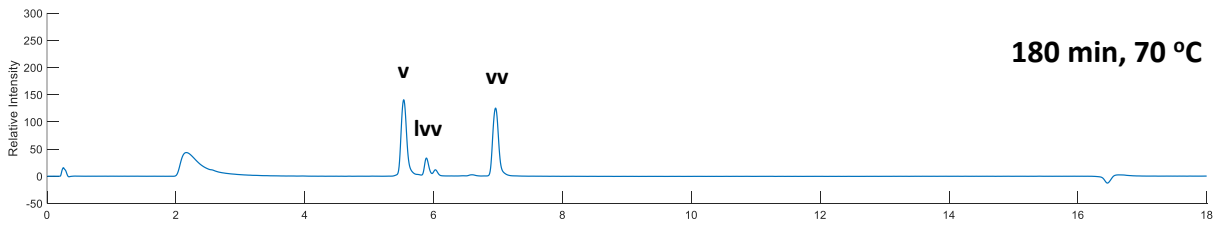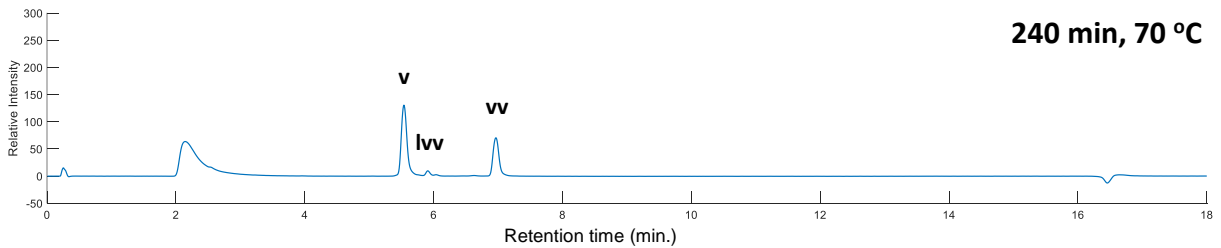

After 60 minutes of sequencing, all the following molecules are observed in the solution and analyzed via High-Res MS.

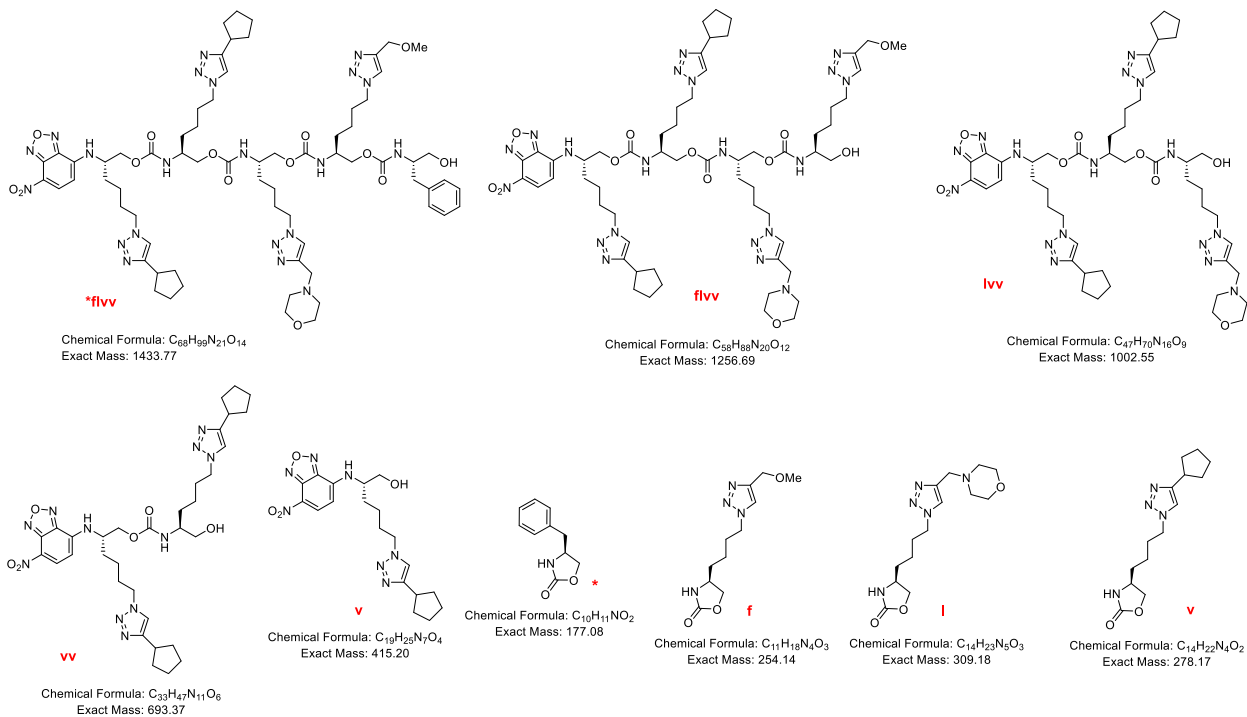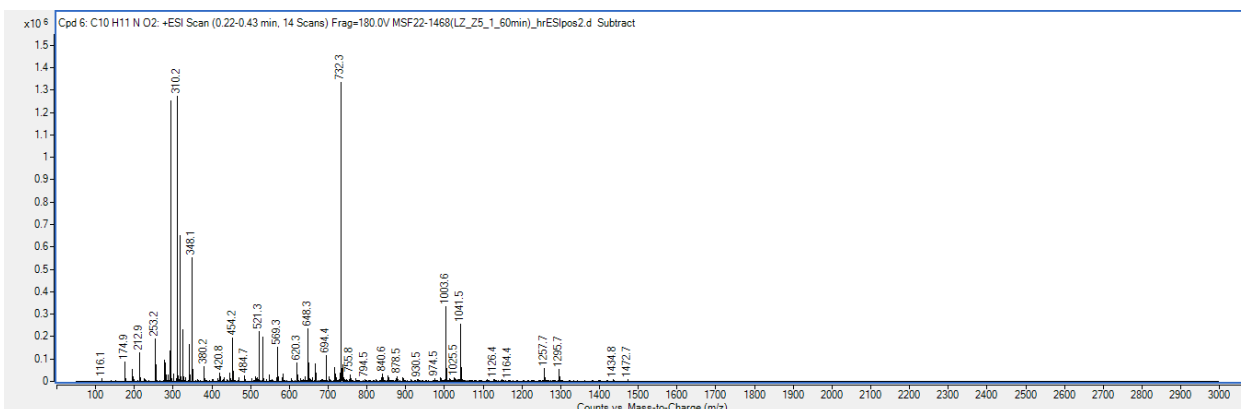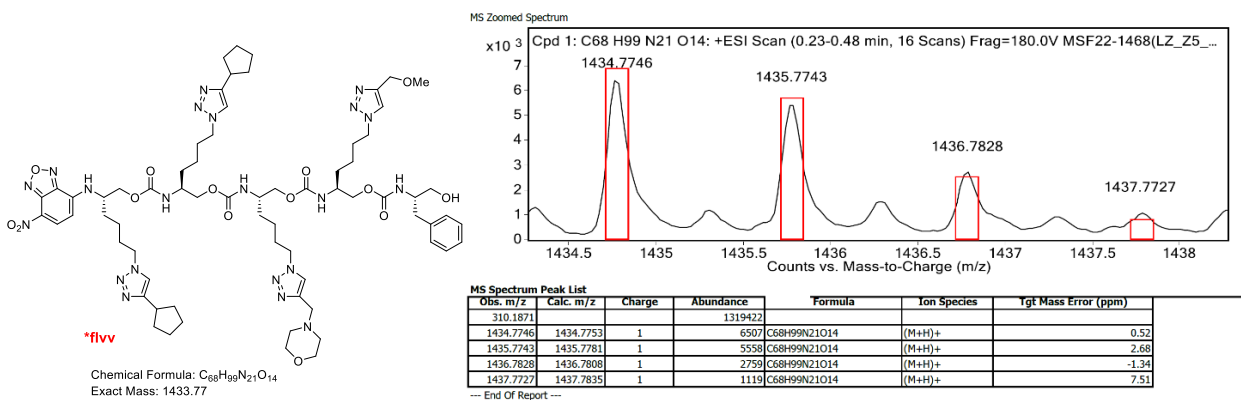

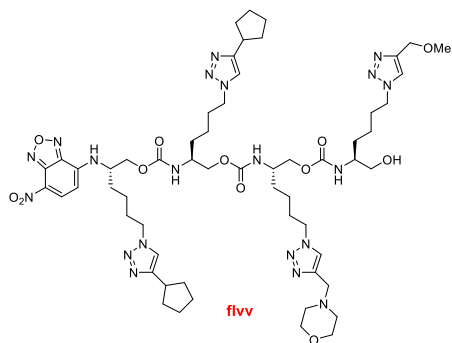

Chemical Formula: C<sub>58</sub>H<sub>88</sub>N<sub>20</sub>O<sub>12</sub>

MS Zoomed Spectrum

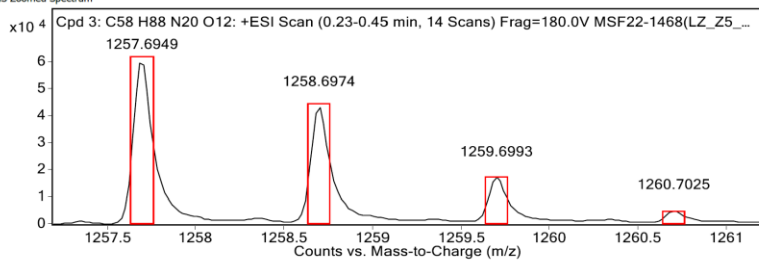

| Obs. m/z  | Calc. m/z | Charge | Abundance | Formula                                                         | Ion Species        | Tgt Mass Error (ppm) |
|-----------|-----------|--------|-----------|-----------------------------------------------------------------|--------------------|----------------------|
| 732.3339  |           |        | 1417106   |                                                                 |                    |                      |
| 1257.6949 | 1257.6963 | 1      | 60978     | C <sub>58</sub> H <sub>88</sub> N <sub>20</sub> O <sub>12</sub> | (M+H) <sup>+</sup> | 1.15                 |
| 1258.6974 | 1258.6991 | 1      | 43406     | C <sub>58</sub> H <sub>88</sub> N <sub>20</sub> O <sub>12</sub> | (M+H) <sup>+</sup> | 1.37                 |
| 1259.6993 | 1259.7017 | 1      | 17361     | C <sub>58</sub> H <sub>88</sub> N <sub>20</sub> O <sub>12</sub> | (M+H) <sup>+</sup> | 1.89                 |
| 1260.7025 | 1260.7043 | 1      | 5165      | C <sub>58</sub> H <sub>88</sub> N <sub>20</sub> O <sub>12</sub> | (M+H) <sup>+</sup> | 1.45                 |
| 1261.6976 | 1261.7068 | 1      | 1822      | C <sub>58</sub> H <sub>88</sub> N <sub>20</sub> O <sub>12</sub> | (M+H) <sup>+</sup> | 7.32                 |

--- End Of Report ---

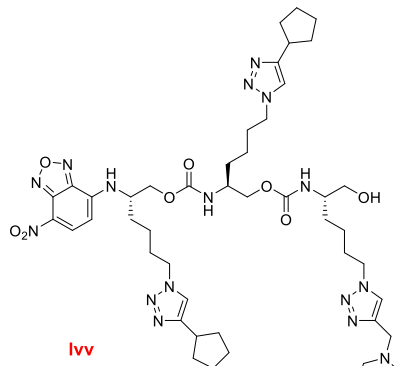

Chemical Formula: C<sub>47</sub>H<sub>70</sub>N<sub>16</sub>O<sub>9</sub>  
Exact Mass: 1002.55

MS Zoomed Spectrum

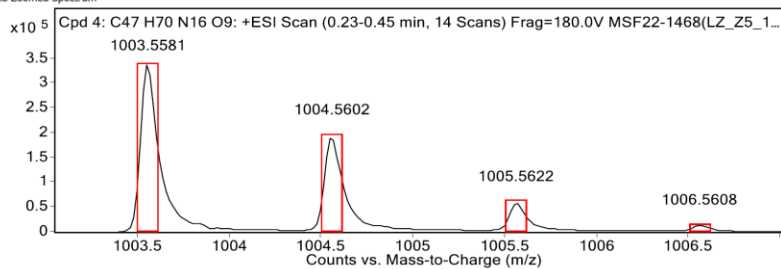

| Obs. m/z  | Calc. m/z | Charge | Abundance | Formula                                                        | Ion Species        | Tgt Mass Error (ppm) |
|-----------|-----------|--------|-----------|----------------------------------------------------------------|--------------------|----------------------|
| 732.3339  |           |        | 1417495   |                                                                |                    |                      |
| 1003.5581 | 1003.5584 | 1      | 339733    | C <sub>47</sub> H <sub>70</sub> N <sub>16</sub> O <sub>9</sub> | (M+H) <sup>+</sup> | 0.34                 |
| 1004.5602 | 1004.5612 | 1      | 193654    | C <sub>47</sub> H <sub>70</sub> N <sub>16</sub> O <sub>9</sub> | (M+H) <sup>+</sup> | 0.96                 |
| 1005.5622 | 1005.5638 | 1      | 58838     | C <sub>47</sub> H <sub>70</sub> N <sub>16</sub> O <sub>9</sub> | (M+H) <sup>+</sup> | 1.61                 |
| 1006.5608 | 1006.5664 | 1      | 11576     | C <sub>47</sub> H <sub>70</sub> N <sub>16</sub> O <sub>9</sub> | (M+H) <sup>+</sup> | 5.53                 |
| 1007.5708 | 1007.5689 | 1      | 2325      | C <sub>47</sub> H <sub>70</sub> N <sub>16</sub> O <sub>9</sub> | (M+H) <sup>+</sup> | -1.89                |
| 1008.6315 | 1008.5713 | 1      | 351       | C <sub>47</sub> H <sub>70</sub> N <sub>16</sub> O <sub>9</sub> | (M+H) <sup>+</sup> | -59.63               |

--- End Of Report ---

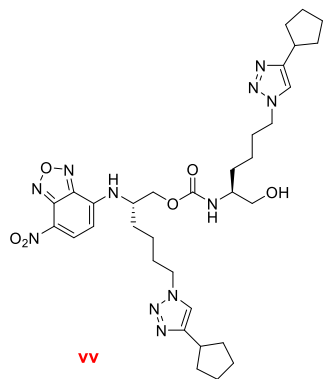

Chemical Formula: C<sub>33</sub>H<sub>47</sub>N<sub>11</sub>O<sub>6</sub>  
Exact Mass: 693.37

VV

MS Zoomed Spectrum

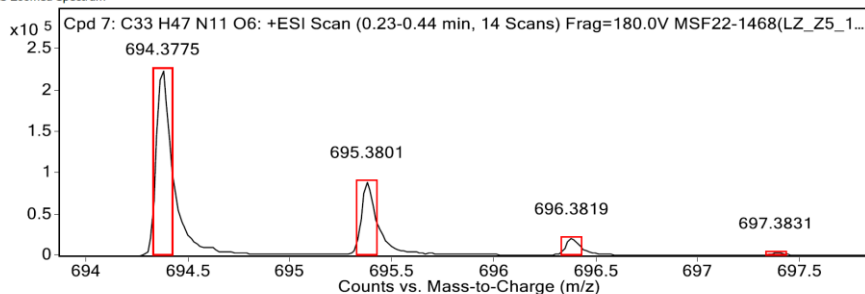

MS Spectrum Peak List

| Obs. m/z | Calc. m/z | Charge | Abundance | Formula                                                        | Ion Species        | Tgt Mass Error (ppm) |
|----------|-----------|--------|-----------|----------------------------------------------------------------|--------------------|----------------------|
| 310.1870 |           |        | 1466951   |                                                                |                    |                      |
| 694.3775 | 694.3784  | 1      | 225503    | C <sub>33</sub> H <sub>47</sub> N <sub>11</sub> O <sub>6</sub> | (M+H) <sup>+</sup> | 1.23                 |
| 695.3801 | 695.3811  | 1      | 89447     | C <sub>33</sub> H <sub>47</sub> N <sub>11</sub> O <sub>6</sub> | (M+H) <sup>+</sup> | 1.55                 |
| 696.3819 | 696.3837  | 1      | 21247     | C <sub>33</sub> H <sub>47</sub> N <sub>11</sub> O <sub>6</sub> | (M+H) <sup>+</sup> | 2.63                 |
| 697.3831 | 697.3862  | 1      | 3503      | C <sub>33</sub> H <sub>47</sub> N <sub>11</sub> O <sub>6</sub> | (M+H) <sup>+</sup> | 4.52                 |
| 698.3601 | 698.3887  | 1      | 826       | C <sub>33</sub> H <sub>47</sub> N <sub>11</sub> O <sub>6</sub> | (M+H) <sup>+</sup> | 40.92                |

--- End Of Report ---

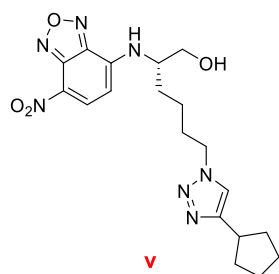

Chemical Formula: C<sub>19</sub>H<sub>25</sub>N<sub>7</sub>O<sub>4</sub>  
Exact Mass: 415.20

V

MS Zoomed Spectrum

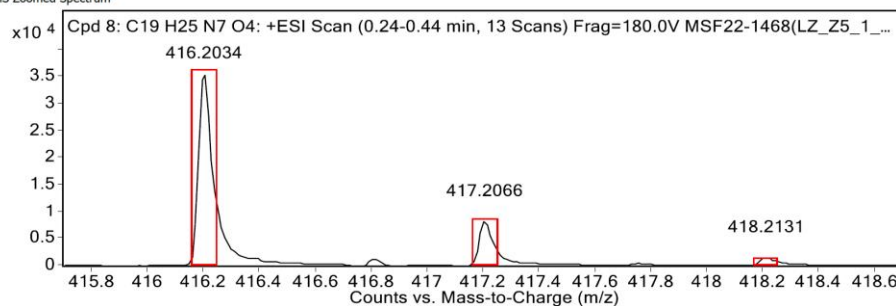

MS Spectrum Peak List

| Obs. m/z | Calc. m/z | Charge | Abundance | Formula                                                       | Ion Species        | Tgt Mass Error (ppm) |
|----------|-----------|--------|-----------|---------------------------------------------------------------|--------------------|----------------------|
| 310.1870 |           |        | 1579303   |                                                               |                    |                      |
| 416.2034 | 416.2041  | 1      | 35990     | C <sub>19</sub> H <sub>25</sub> N <sub>7</sub> O <sub>4</sub> | (M+H) <sup>+</sup> | 1.74                 |
| 417.2066 | 417.2068  | 1      | 8355      | C <sub>19</sub> H <sub>25</sub> N <sub>7</sub> O <sub>4</sub> | (M+H) <sup>+</sup> | 0.35                 |
| 418.2131 | 418.2092  | 1      | 1581      | C <sub>19</sub> H <sub>25</sub> N <sub>7</sub> O <sub>4</sub> | (M+H) <sup>+</sup> | -9.4                 |

--- End Of Report ---

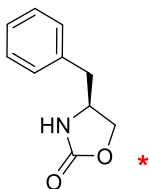

Chemical Formula: C<sub>10</sub>H<sub>11</sub>NO<sub>2</sub>  
Exact Mass: 177.08

\*

MS Zoomed Spectrum

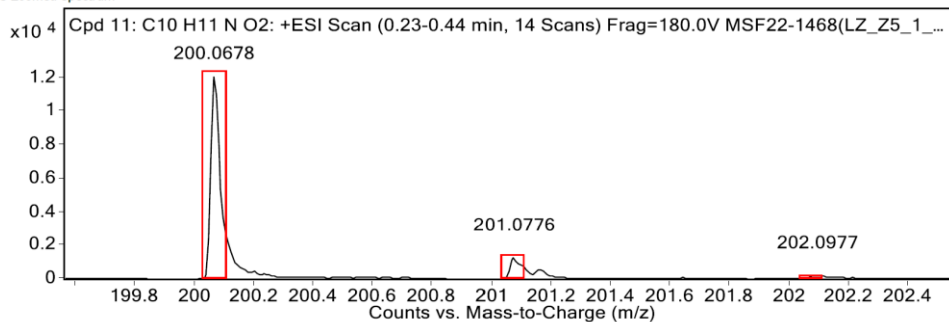

MS Spectrum Peak List

| Obs. m/z | Calc. m/z | Charge | Abundance | Formula                                         | Ion Species         | Tgt Mass Error (ppm) |
|----------|-----------|--------|-----------|-------------------------------------------------|---------------------|----------------------|
| 200.0678 | 200.0682  | 1      | 12276     | C <sub>10</sub> H <sub>11</sub> NO <sub>2</sub> | (M+Na) <sup>+</sup> | 1.99                 |
| 201.0776 | 201.0714  | 1      | 1312      | C <sub>10</sub> H <sub>11</sub> NO <sub>2</sub> | (M+Na) <sup>+</sup> | -30.94               |
| 202.0977 | 202.0737  | 1      | 245       | C <sub>10</sub> H <sub>11</sub> NO <sub>2</sub> | (M+Na) <sup>+</sup> | -118.93              |
| 310.1870 |           |        | 1466891   |                                                 |                     |                      |

--- End Of Report ---



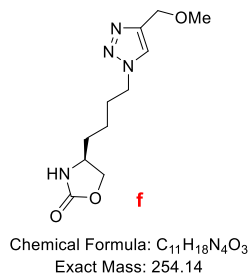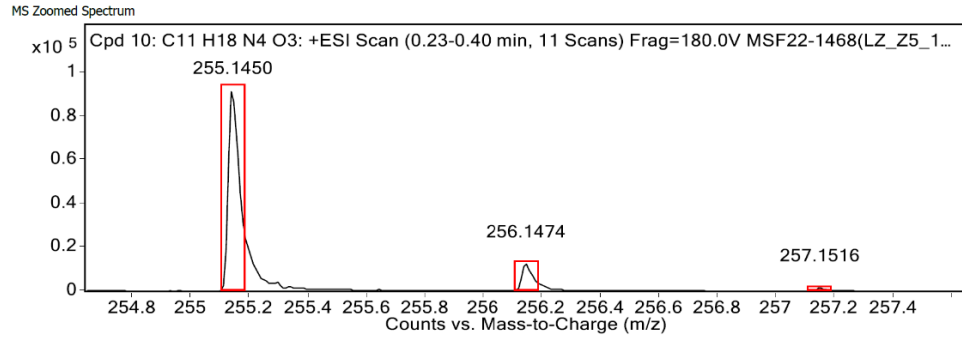

MS Spectrum Peak List

| Obs. m/z | Calc. m/z | Charge | Abundance | Formula                                                       | Ion Species        | Tgt Mass Error (ppm) |
|----------|-----------|--------|-----------|---------------------------------------------------------------|--------------------|----------------------|
| 255.1450 | 255.1452  | 1      | 93982     | C <sub>11</sub> H <sub>18</sub> N <sub>4</sub> O <sub>3</sub> | (M+H) <sup>+</sup> | 0.59                 |
| 256.1474 | 256.1479  | 1      | 12553     | C <sub>11</sub> H <sub>18</sub> N <sub>4</sub> O <sub>3</sub> | (M+H) <sup>+</sup> | 1.83                 |
| 257.1516 | 257.1501  | 1      | 1635      | C <sub>11</sub> H <sub>18</sub> N <sub>4</sub> O <sub>3</sub> | (M+H) <sup>+</sup> | -5.79                |
| 258.1549 | 258.1524  | 1      | 296       | C <sub>11</sub> H <sub>18</sub> N <sub>4</sub> O <sub>3</sub> | (M+H) <sup>+</sup> | -9.36                |
| 310.1871 |           |        | 1547083   |                                                               |                    |                      |

--- End Of Report ---

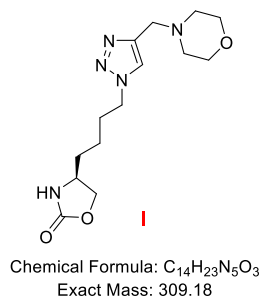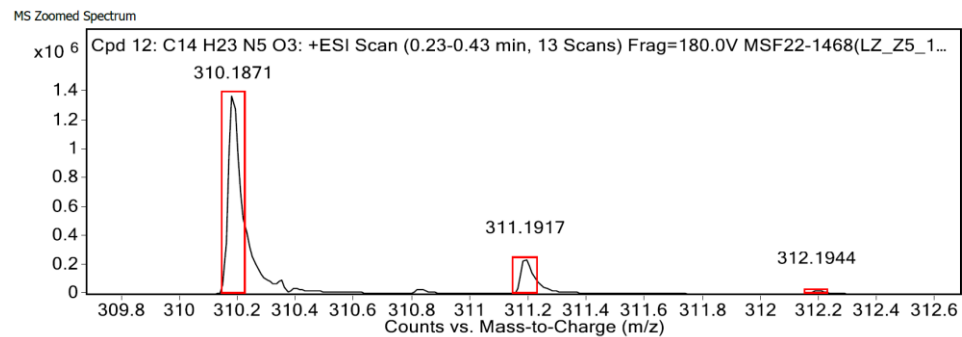

MS Spectrum Peak List

| Obs. m/z | Calc. m/z | Charge | Abundance | Formula                                                       | Ion Species        | Tgt Mass Error (ppm) |
|----------|-----------|--------|-----------|---------------------------------------------------------------|--------------------|----------------------|
| 310.1871 | 310.1874  | 1      | 1395079   | C <sub>14</sub> H <sub>23</sub> N <sub>5</sub> O <sub>3</sub> | (M+H) <sup>+</sup> | 0.79                 |
| 311.1917 | 311.1901  | 1      | 242452    | C <sub>14</sub> H <sub>23</sub> N <sub>5</sub> O <sub>3</sub> | (M+H) <sup>+</sup> | -5                   |
| 312.1944 | 312.1924  | 1      | 28381     | C <sub>14</sub> H <sub>23</sub> N <sub>5</sub> O <sub>3</sub> | (M+H) <sup>+</sup> | -6.15                |
| 313.2042 | 313.1948  | 1      | 2587      | C <sub>14</sub> H <sub>23</sub> N <sub>5</sub> O <sub>3</sub> | (M+H) <sup>+</sup> | -29.88               |
| 732.3339 |           |        | 1437123   |                                                               |                    |                      |

--- End Of Report ---

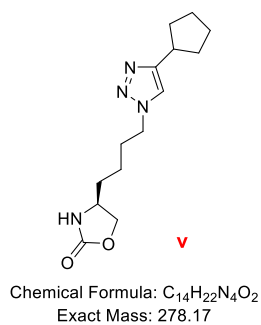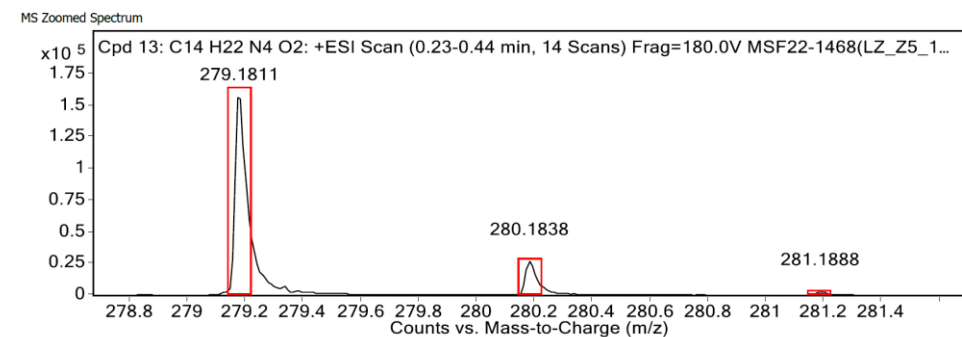

MS Spectrum Peak List

| Obs. m/z | Calc. m/z | Charge | Abundance | Formula                                                       | Ion Species        | Tgt Mass Error (ppm) |
|----------|-----------|--------|-----------|---------------------------------------------------------------|--------------------|----------------------|
| 279.1811 | 279.1816  | 1      | 163805    | C <sub>14</sub> H <sub>22</sub> N <sub>4</sub> O <sub>2</sub> | (M+H) <sup>+</sup> | 1.59                 |
| 280.1838 | 280.1844  | 1      | 27120     | C <sub>14</sub> H <sub>22</sub> N <sub>4</sub> O <sub>2</sub> | (M+H) <sup>+</sup> | 2.32                 |
| 281.1888 | 281.1869  | 1      | 3208      | C <sub>14</sub> H <sub>22</sub> N <sub>4</sub> O <sub>2</sub> | (M+H) <sup>+</sup> | -6.59                |
| 310.1870 |           |        | 1466986   |                                                               |                    |                      |

--- End Of Report ---

**Oligomer Z5\_2: \*flvv**

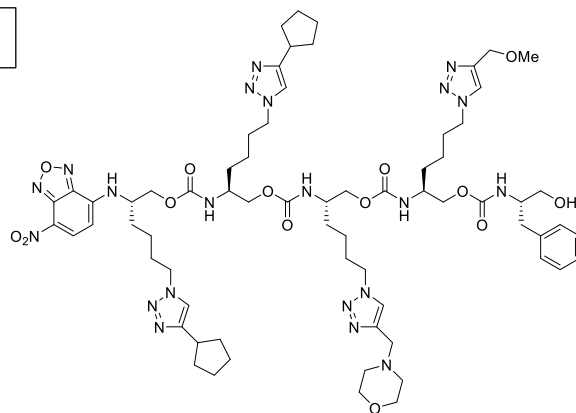

Exact Mass: 1433.77

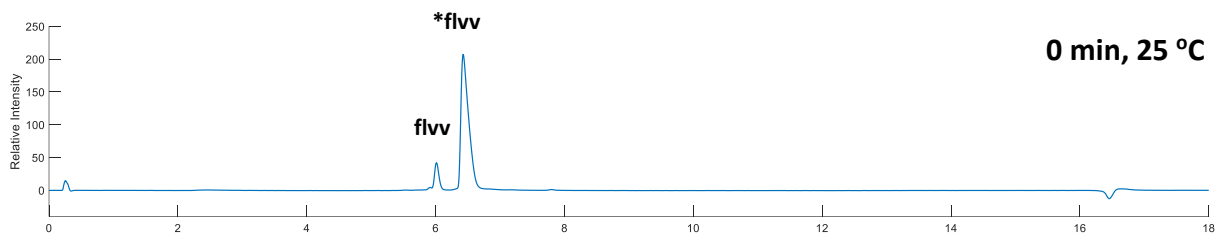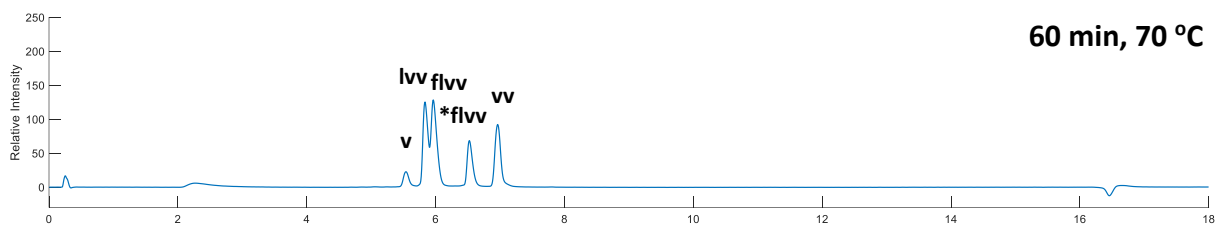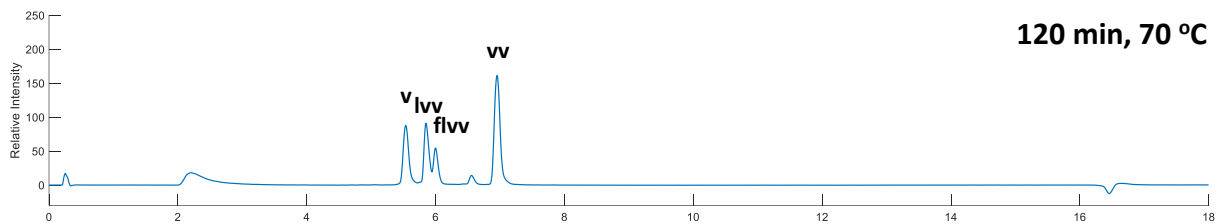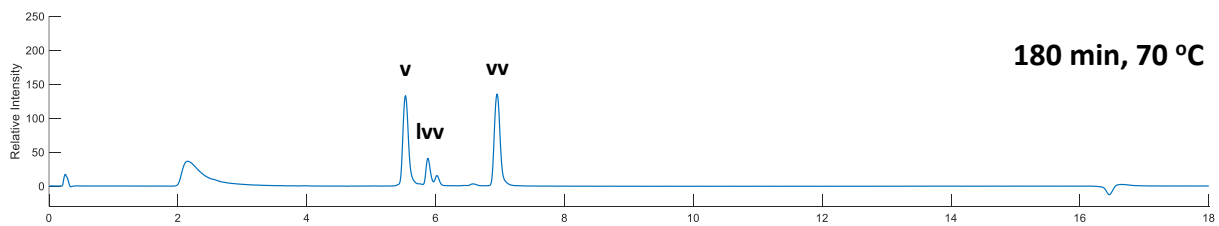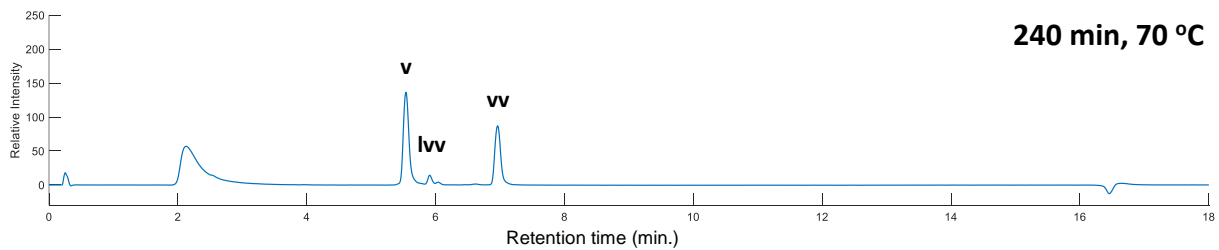

Retention time (min.)

Oligomer Z6\_1: \*4e5f

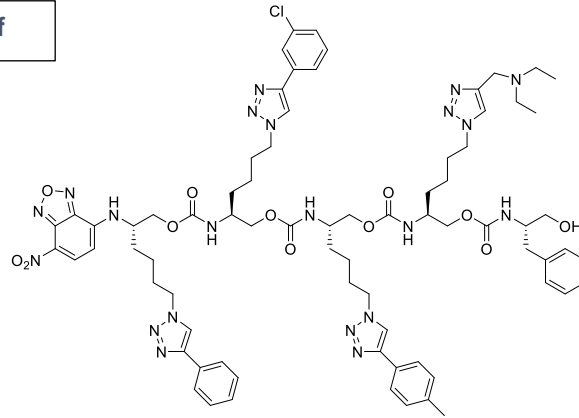

Exact Mass: 1515.71

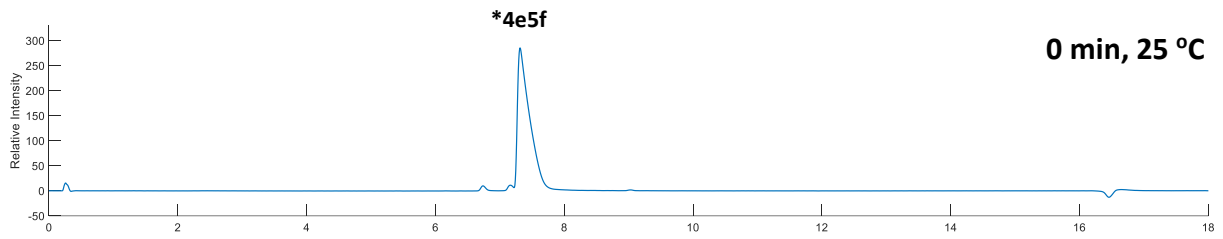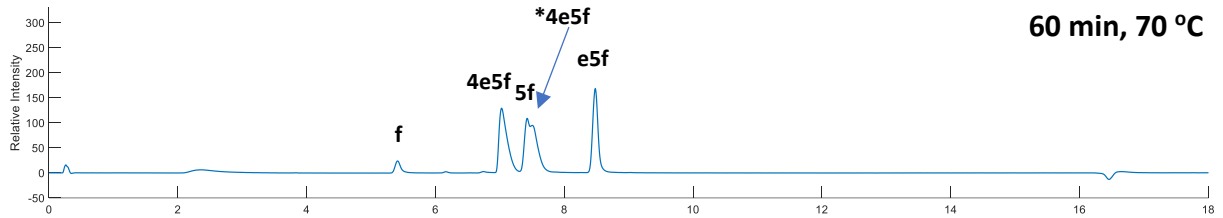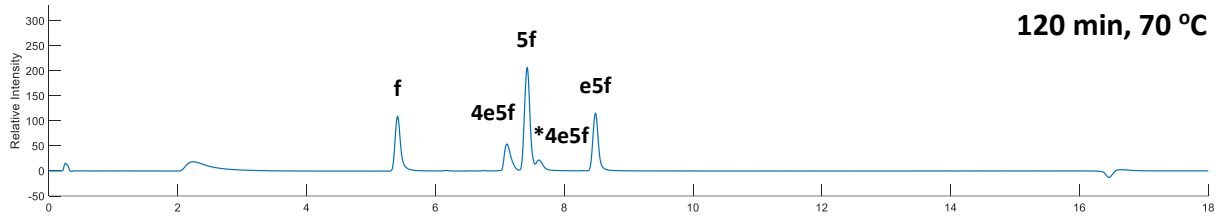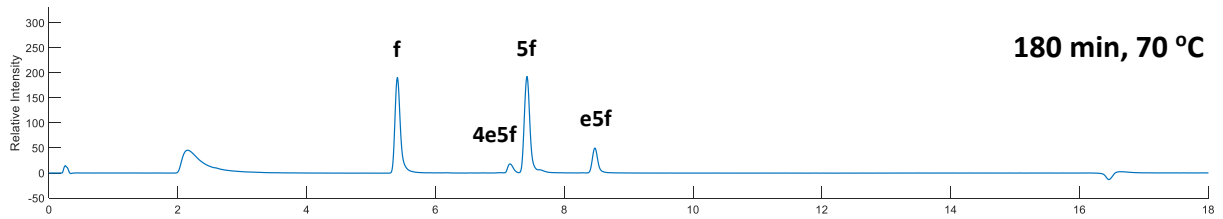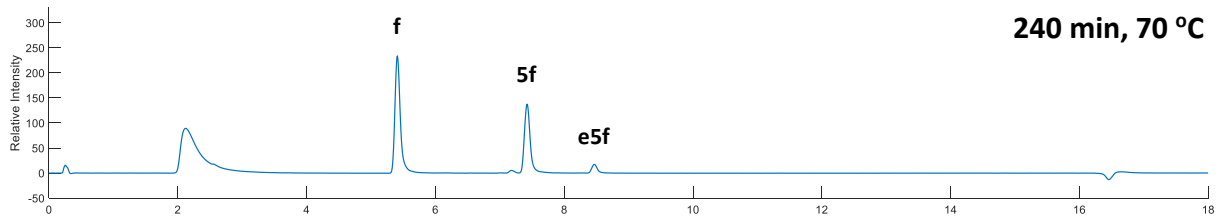

After 60 minutes of sequencing, all the following molecules are observed in the solution and analyzed via High-Res MS.

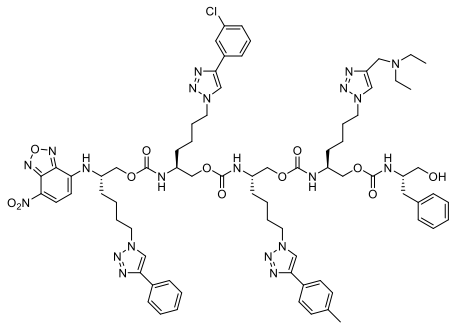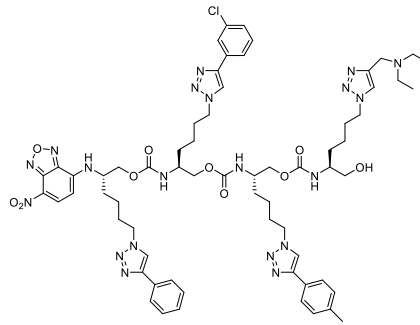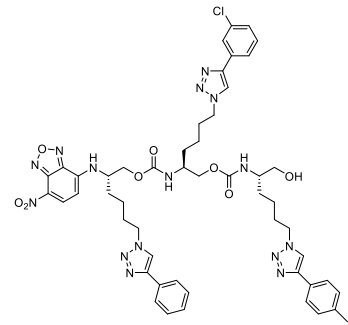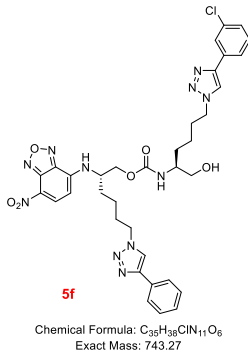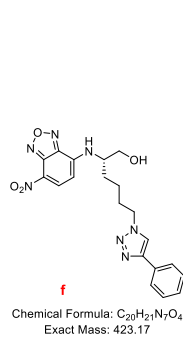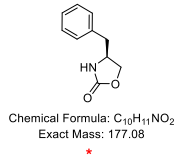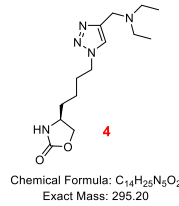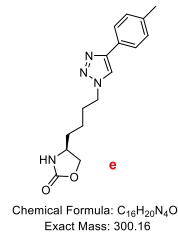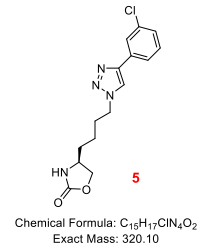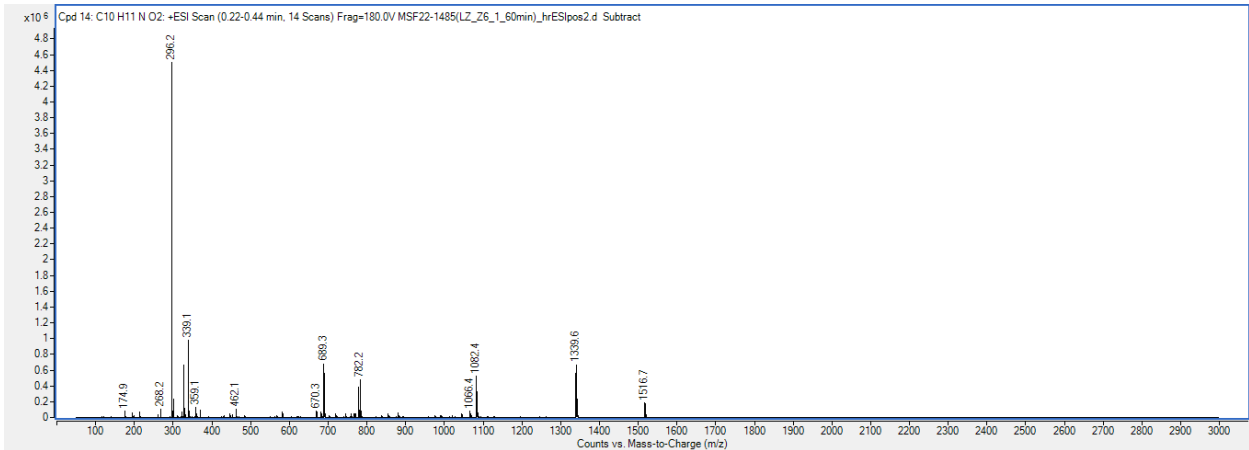

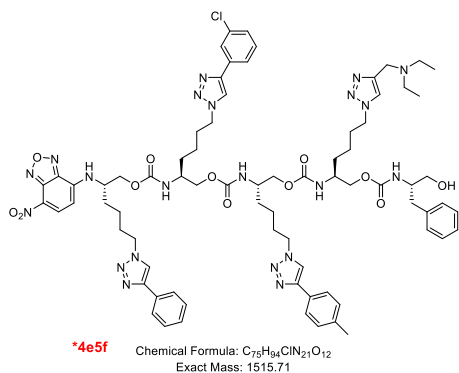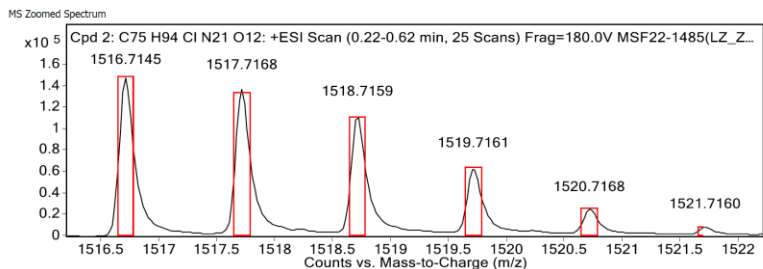

| Obs. m/z  | Calc. m/z | Charge | Abundance | Formula        | Ion Species | Tgt Mass Error (ppm) |
|-----------|-----------|--------|-----------|----------------|-------------|----------------------|
| 296.2077  |           |        | 4027732   |                |             |                      |
| 1516.7145 | 1516.7152 | 1      | 147801    | C75H94ClN21O12 | (M+H)+      | 0.47                 |
| 1517.7168 | 1517.7181 | 1      | 136649    | C75H94ClN21O12 | (M+H)+      | 0.84                 |
| 1518.7159 | 1518.7172 | 1      | 111863    | C75H94ClN21O12 | (M+H)+      | 0.83                 |
| 1519.7161 | 1519.7179 | 1      | 63748     | C75H94ClN21O12 | (M+H)+      | 1.2                  |
| 1520.7168 | 1520.7196 | 1      | 22808     | C75H94ClN21O12 | (M+H)+      | 1.86                 |
| 1521.7160 | 1521.7218 | 1      | 6843      | C75H94ClN21O12 | (M+H)+      | 3.76                 |
| 1522.7186 | 1522.7241 | 1      | 1843      | C75H94ClN21O12 | (M+H)+      | 3.62                 |
| 1523.6572 | 1523.7265 | 1      | 550       | C75H94ClN21O12 | (M+H)+      | 45.5                 |

--- End Of Report ---

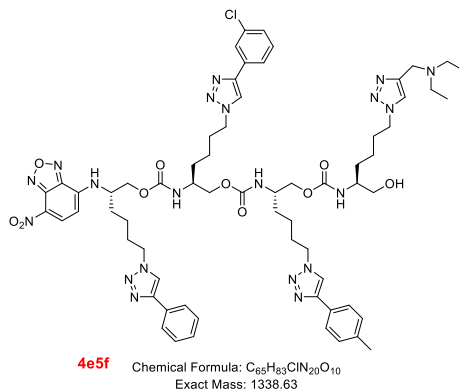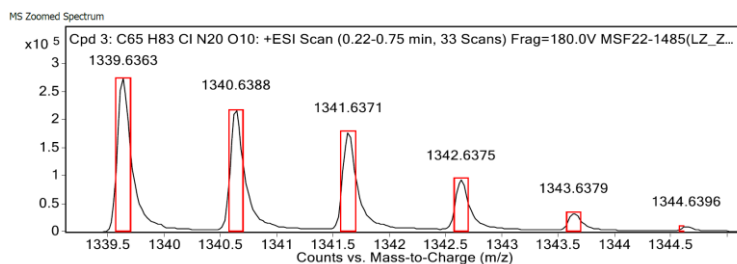

| Obs. m/z  | Calc. m/z | Charge | Abundance | Formula        | Ion Species | Tgt Mass Error (ppm) |
|-----------|-----------|--------|-----------|----------------|-------------|----------------------|
| 296.2077  |           |        | 2549357   |                |             |                      |
| 1339.6363 | 1339.6362 | 1      | 274774    | C65H83ClN20O10 | (M+H)+      | -0.06                |
| 1340.6388 | 1340.6390 | 1      | 218795    | C65H83ClN20O10 | (M+H)+      | 0.16                 |
| 1341.6371 | 1341.6376 | 1      | 178187    | C65H83ClN20O10 | (M+H)+      | 0.36                 |
| 1342.6375 | 1342.6384 | 1      | 93068     | C65H83ClN20O10 | (M+H)+      | 0.66                 |
| 1343.6379 | 1343.6402 | 1      | 34085     | C65H83ClN20O10 | (M+H)+      | 1.69                 |
| 1344.6396 | 1344.6424 | 1      | 10338     | C65H83ClN20O10 | (M+H)+      | 2.12                 |
| 1345.6400 | 1345.6447 | 1      | 3456      | C65H83ClN20O10 | (M+H)+      | 3.52                 |

--- End Of Report ---

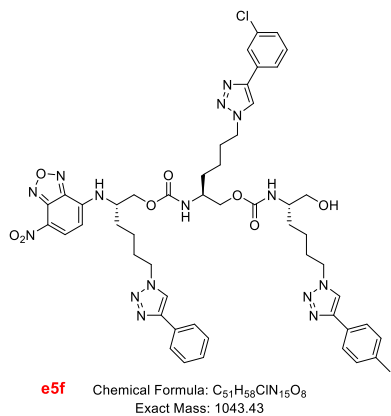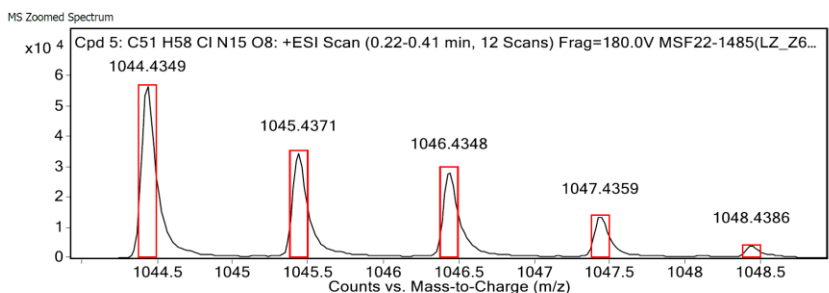

| Obs. m/z  | Calc. m/z | Charge | Abundance | Formula       | Ion Species | Tgt Mass Error (ppm) |
|-----------|-----------|--------|-----------|---------------|-------------|----------------------|
| 296.2077  |           |        | 4116022   |               |             |                      |
| 1044.4349 | 1044.4354 | 1      | 57102     | C51H58ClN15O8 | (M+H)+      | 0.47                 |
| 1045.4371 | 1045.4382 | 1      | 34677     | C51H58ClN15O8 | (M+H)+      | 1.08                 |
| 1046.4348 | 1046.4358 | 1      | 28709     | C51H58ClN15O8 | (M+H)+      | 0.93                 |
| 1047.4359 | 1047.4369 | 1      | 13870     | C51H58ClN15O8 | (M+H)+      | 0.92                 |
| 1048.4386 | 1048.4389 | 1      | 4234      | C51H58ClN15O8 | (M+H)+      | 0.37                 |
| 1049.4423 | 1049.4413 | 1      | 1288      | C51H58ClN15O8 | (M+H)+      | -1.03                |

--- End Of Report ---

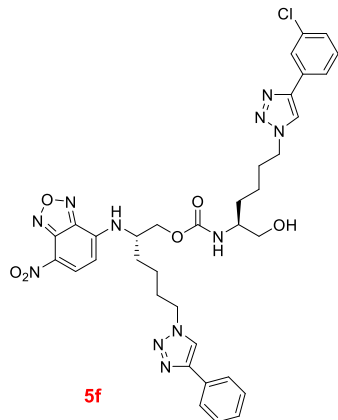

Chemical Formula: C<sub>35</sub>H<sub>38</sub>ClN<sub>11</sub>O<sub>6</sub>  
Exact Mass: 743.27

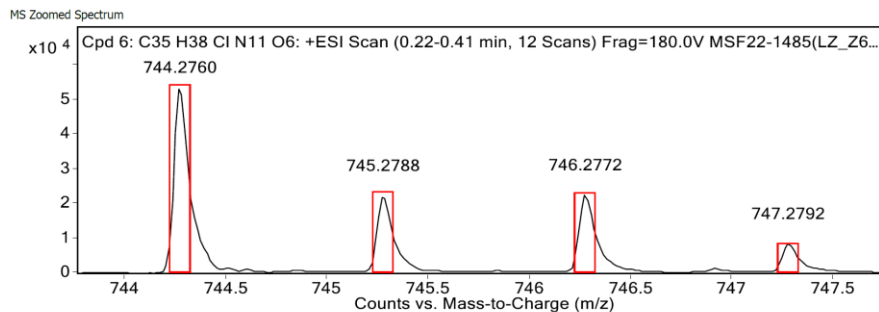

| Obs. m/z | Calc. m/z | Charge | Abundance | Formula                                                          | Ion Species        | Tgt Mass Error (ppm) |
|----------|-----------|--------|-----------|------------------------------------------------------------------|--------------------|----------------------|
| 296.2077 |           |        | 4130249   |                                                                  |                    |                      |
| 744.2760 | 744.2768  | 1      | 54173     | C <sub>35</sub> H <sub>38</sub> ClN <sub>11</sub> O <sub>6</sub> | (M+H) <sup>+</sup> | 1.12                 |
| 745.2788 | 745.2796  | 1      | 22515     | C <sub>35</sub> H <sub>38</sub> ClN <sub>11</sub> O <sub>6</sub> | (M+H) <sup>+</sup> | 1.02                 |
| 746.2772 | 746.2758  | 1      | 22706     | C <sub>35</sub> H <sub>38</sub> ClN <sub>11</sub> O <sub>6</sub> | (M+H) <sup>+</sup> | -1.78                |
| 747.2792 | 747.2775  | 1      | 8634      | C <sub>35</sub> H <sub>38</sub> ClN <sub>11</sub> O <sub>6</sub> | (M+H) <sup>+</sup> | -2.19                |
| 748.2913 | 748.2798  | 1      | 2091      | C <sub>35</sub> H <sub>38</sub> ClN <sub>11</sub> O <sub>6</sub> | (M+H) <sup>+</sup> | -15.44               |

--- End Of Report ---

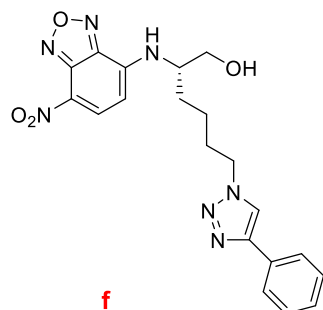

Chemical Formula: C<sub>20</sub>H<sub>21</sub>N<sub>7</sub>O<sub>4</sub>  
Exact Mass: 423.17

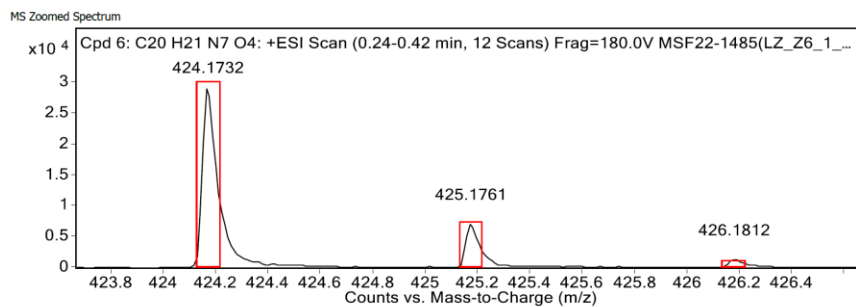

| Obs. m/z | Calc. m/z | Charge | Abundance | Formula                                                       | Ion Species        | Tgt Mass Error (ppm) |
|----------|-----------|--------|-----------|---------------------------------------------------------------|--------------------|----------------------|
| 296.2074 |           |        | 2614340   |                                                               |                    |                      |
| 424.1732 | 424.1728  | 1      | 29717     | C <sub>20</sub> H <sub>21</sub> N <sub>7</sub> O <sub>4</sub> | (M+H) <sup>+</sup> | -1.04                |
| 425.1761 | 425.1755  | 1      | 7217      | C <sub>20</sub> H <sub>21</sub> N <sub>7</sub> O <sub>4</sub> | (M+H) <sup>+</sup> | -1.28                |
| 426.1812 | 426.1780  | 1      | 1448      | C <sub>20</sub> H <sub>21</sub> N <sub>7</sub> O <sub>4</sub> | (M+H) <sup>+</sup> | -7.56                |
| 427.2155 | 427.1803  | 1      | 210       | C <sub>20</sub> H <sub>21</sub> N <sub>7</sub> O <sub>4</sub> | (M+H) <sup>+</sup> | -82.23               |

--- End Of Report ---

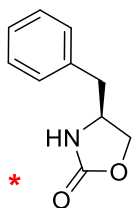

Chemical Formula:  
C<sub>10</sub>H<sub>11</sub>NO<sub>2</sub>  
Exact Mass: 177.08

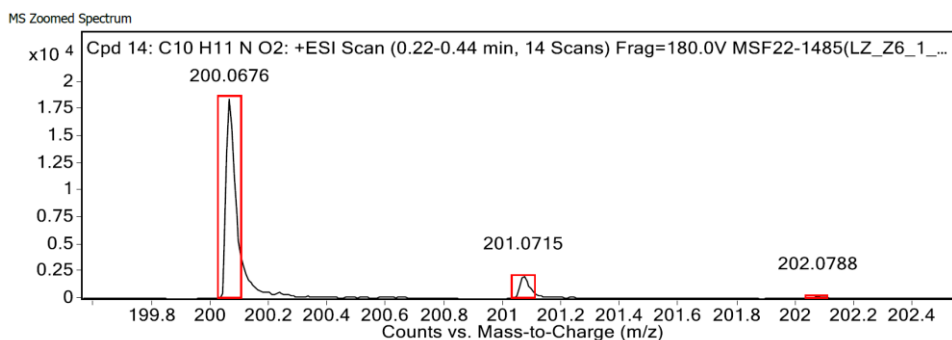

| Obs. m/z | Calc. m/z | Charge | Abundance | Formula                                         | Ion Species         | Tgt Mass Error (ppm) |
|----------|-----------|--------|-----------|-------------------------------------------------|---------------------|----------------------|
| 200.0676 | 200.0682  | 1      | 18541     | C <sub>10</sub> H <sub>11</sub> NO <sub>2</sub> | (M+Na) <sup>+</sup> | 3                    |
| 201.0715 | 201.0714  | 1      | 2145      | C <sub>10</sub> H <sub>11</sub> NO <sub>2</sub> | (M+Na) <sup>+</sup> | -0.5                 |
| 202.0788 | 202.0737  | 1      | 287       | C <sub>10</sub> H <sub>11</sub> NO <sub>2</sub> | (M+Na) <sup>+</sup> | -25.33               |
| 296.2077 |           |        | 4499905   |                                                 |                     |                      |

--- End Of Report ---

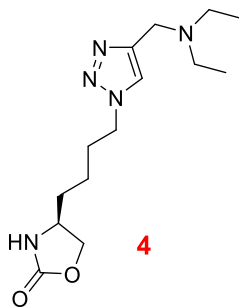

Chemical Formula: C<sub>14</sub>H<sub>25</sub>N<sub>5</sub>O<sub>2</sub>  
Exact Mass: 295.20

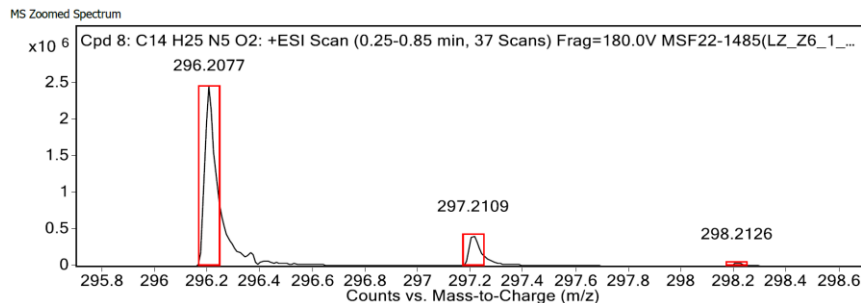

| Obs. m/z | Calc. m/z | Charge | Abundance | Formula                                                       | Ion Species        | Tgt Mass Error (ppm) |
|----------|-----------|--------|-----------|---------------------------------------------------------------|--------------------|----------------------|
| 296.2077 | 296.2081  | 1      | 2459419   | C <sub>14</sub> H <sub>25</sub> N <sub>5</sub> O <sub>2</sub> | (M+H) <sup>+</sup> | 1.26                 |
| 297.2109 | 297.2108  | 1      | 422901    | C <sub>14</sub> H <sub>25</sub> N <sub>5</sub> O <sub>2</sub> | (M+H) <sup>+</sup> | -0.18                |
| 298.2126 | 298.2133  | 1      | 44286     | C <sub>14</sub> H <sub>25</sub> N <sub>5</sub> O <sub>2</sub> | (M+H) <sup>+</sup> | 2.37                 |
| 299.2148 | 299.2156  | 1      | 3356      | C <sub>14</sub> H <sub>25</sub> N <sub>5</sub> O <sub>2</sub> | (M+H) <sup>+</sup> | 2.67                 |

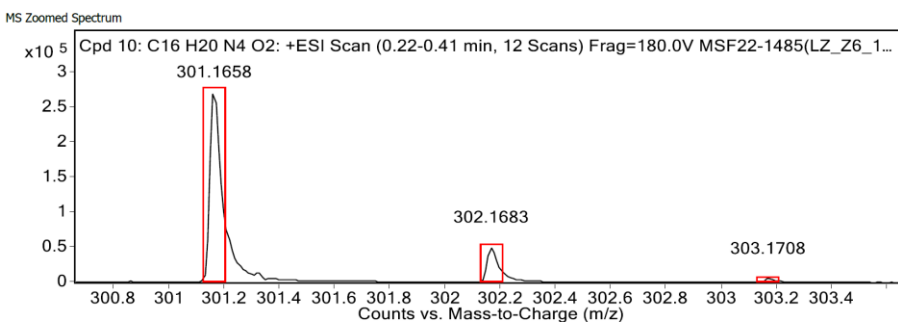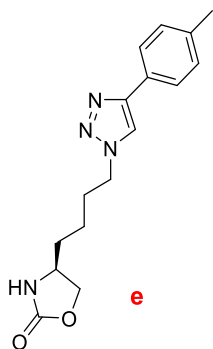

Chemical Formula: C<sub>16</sub>H<sub>20</sub>N<sub>4</sub>O<sub>2</sub>  
Exact Mass: 300.16

| Obs. m/z | Calc. m/z | Charge | Abundance | Formula                                                       | Ion Species        | Tgt Mass Error (ppm) |
|----------|-----------|--------|-----------|---------------------------------------------------------------|--------------------|----------------------|
| 296.2077 |           |        | 4192038   |                                                               |                    |                      |
| 301.1658 | 301.1659  | 1      | 276416    | C <sub>16</sub> H <sub>20</sub> N <sub>4</sub> O <sub>2</sub> | (M+H) <sup>+</sup> | 0.23                 |
| 302.1683 | 302.1688  | 1      | 50363     | C <sub>16</sub> H <sub>20</sub> N <sub>4</sub> O <sub>2</sub> | (M+H) <sup>+</sup> | 1.67                 |
| 303.1708 | 303.1714  | 1      | 5711      | C <sub>16</sub> H <sub>20</sub> N <sub>4</sub> O <sub>2</sub> | (M+H) <sup>+</sup> | 1.83                 |
| 304.1100 | 304.1739  | 1      | 381       | C <sub>16</sub> H <sub>20</sub> N <sub>4</sub> O <sub>2</sub> | (M+H) <sup>+</sup> | 210.05               |

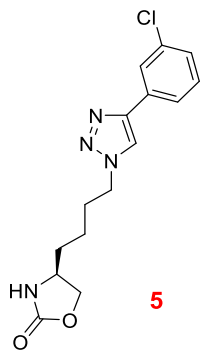

Chemical Formula: C<sub>15</sub>H<sub>17</sub>ClN<sub>4</sub>O<sub>2</sub>  
Exact Mass: 320.10

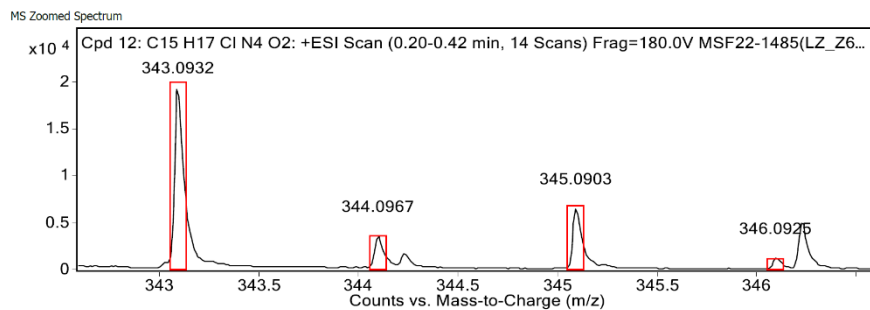

| Obs. m/z | Calc. m/z | Charge | Abundance | Formula                                                         | Ion Species         | Tgt Mass Error (ppm) |
|----------|-----------|--------|-----------|-----------------------------------------------------------------|---------------------|----------------------|
| 296.2074 |           |        | 2117257   |                                                                 |                     |                      |
| 343.0932 | 343.0932  | 1      | 19791     | C <sub>15</sub> H <sub>17</sub> ClN <sub>4</sub> O <sub>2</sub> | (M+Na) <sup>+</sup> | 0.01                 |
| 344.0967 | 344.0961  | 1      | 3716      | C <sub>15</sub> H <sub>17</sub> ClN <sub>4</sub> O <sub>2</sub> | (M+Na) <sup>+</sup> | -1.85                |
| 345.0903 | 345.0908  | 1      | 6641      | C <sub>15</sub> H <sub>17</sub> ClN <sub>4</sub> O <sub>2</sub> | (M+Na) <sup>+</sup> | 1.29                 |
| 346.0925 | 346.0934  | 1      | 1370      | C <sub>15</sub> H <sub>17</sub> ClN <sub>4</sub> O <sub>2</sub> | (M+Na) <sup>+</sup> | 2.61                 |

**Oligomer Z6\_2: \*4e5f**

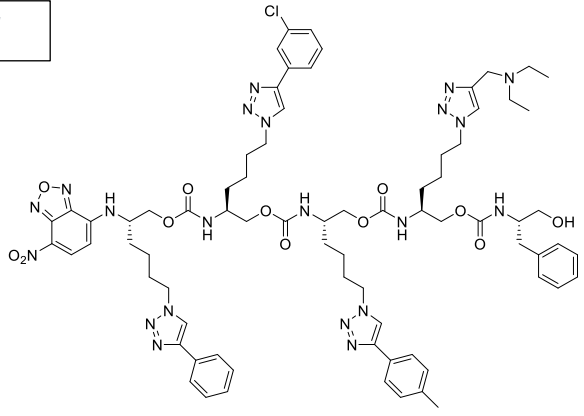

Exact Mass: 1515.71

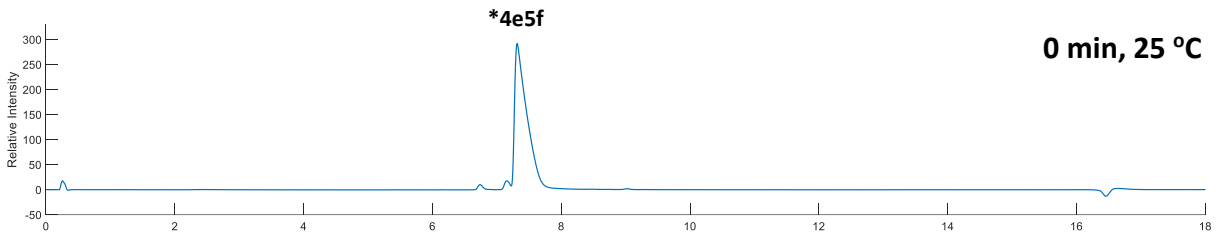

**0 min, 25 °C**

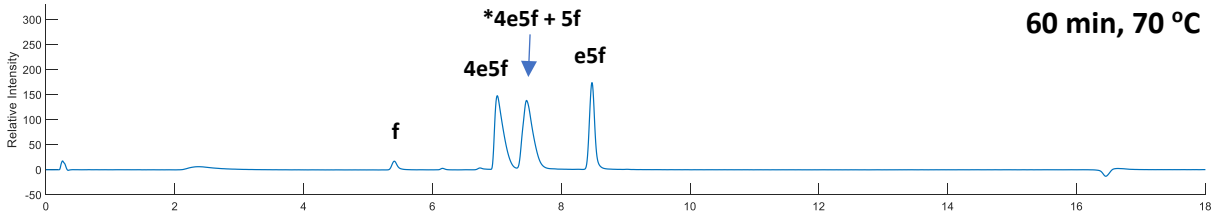

**60 min, 70 °C**

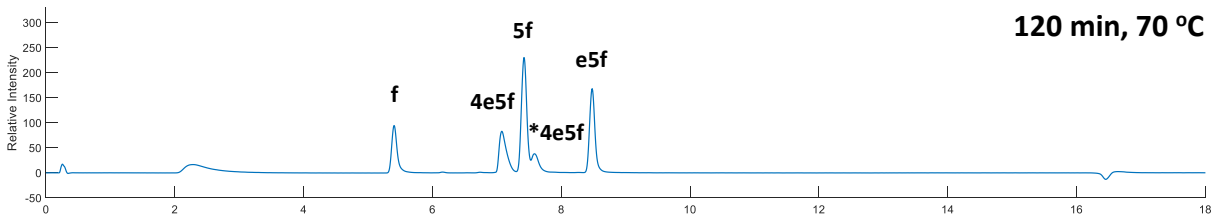

**120 min, 70 °C**

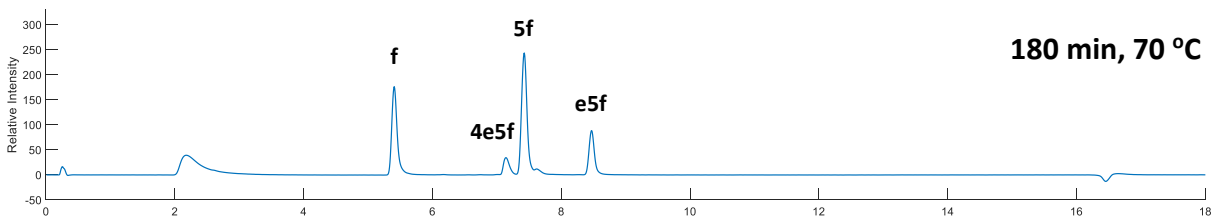

**180 min, 70 °C**

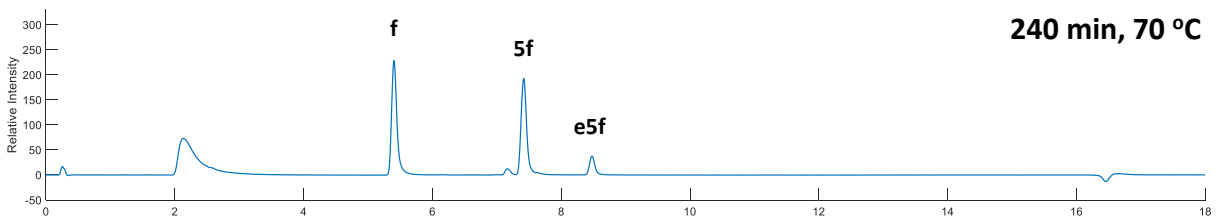

**240 min, 70 °C**

Retention time (min.)



## References

1. Dahlhauser, S. D.; Escamilla, P. R.; Vandewalle, A. N.; York, J. T.; Rapagnani, R. M.; Shei, J. S.; Glass, S. A.; Coronado, J. N.; Moor, S. R.; Saunders, D. P.; Anslyn, E. V. *J. Am. Chem. Soc.* **2020**, *142* (6), 2744–2749.

### III(c). Sequencing the oligomers with overlapping truncated oligomers of similar polarities in LC

Oligomer 4: **#7fd2**

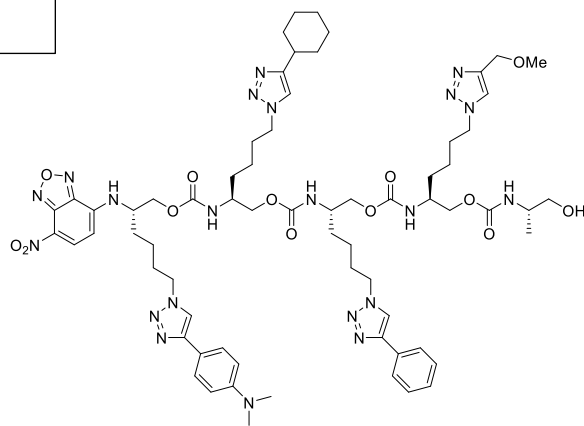

Exact Mass: 1399.73

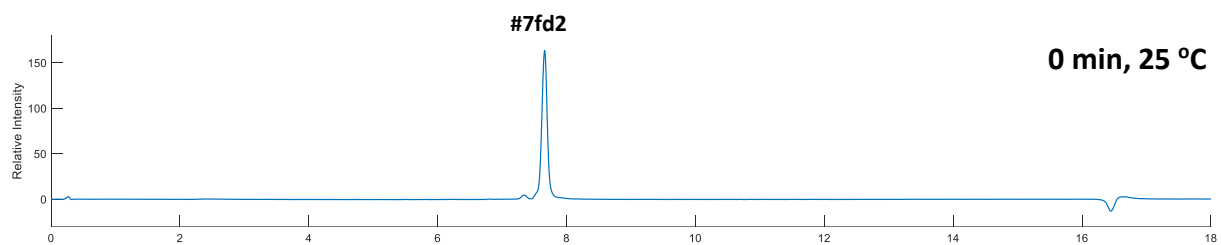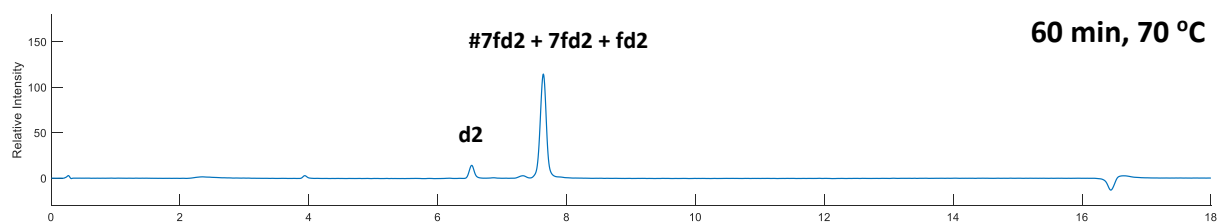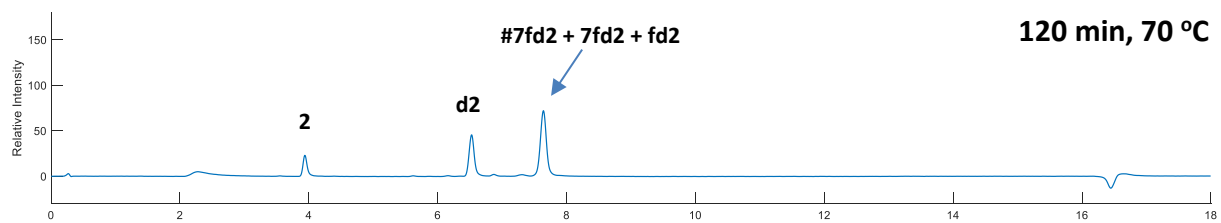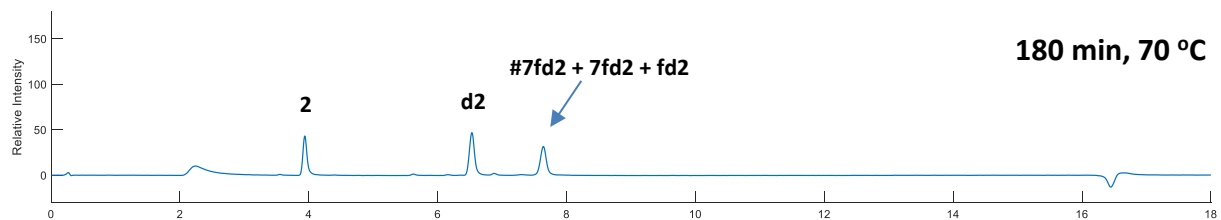

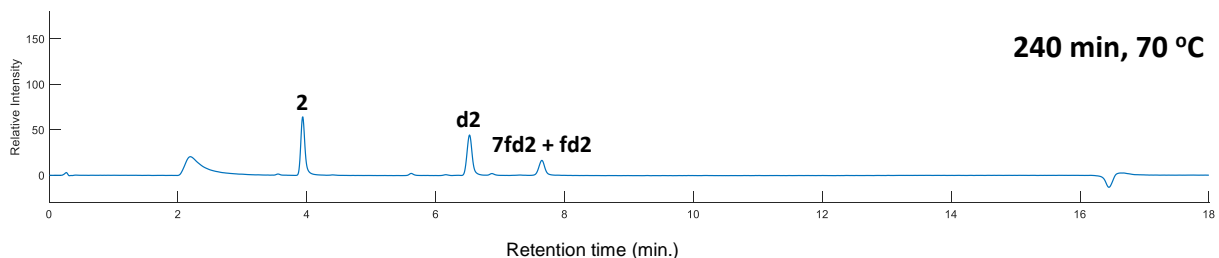

The sequencing of Oligomer 4 (#7fd2) is a scenario where multiple peaks overlap. In this case, it can be difficult to identify what peaks are overlapping, and what is the order in which these peaks show up in LC-MS. The MS data can help in deconvolute that. The process is shown below:

At 0 min, there is only one peak in the LC trace and the corresponding MS for that peak is shown below:

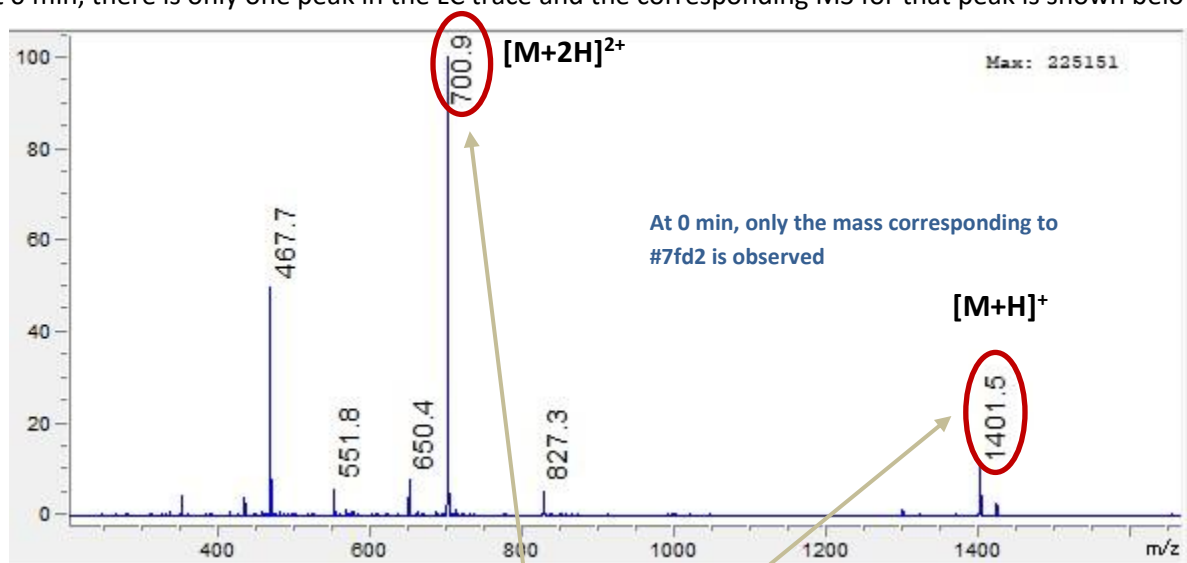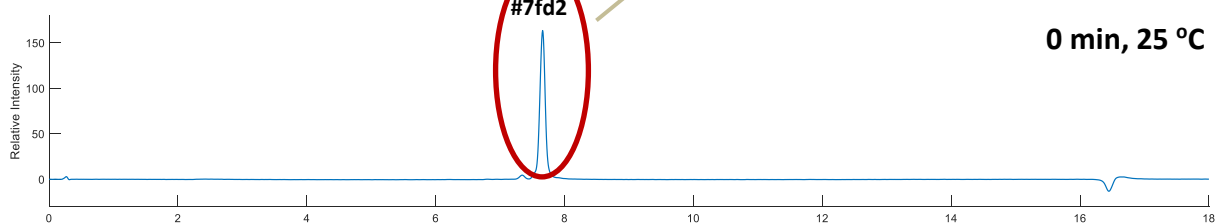

At 60 min, there are two peaks in the LC trace, and the corresponding MS for these peaks are shown below:

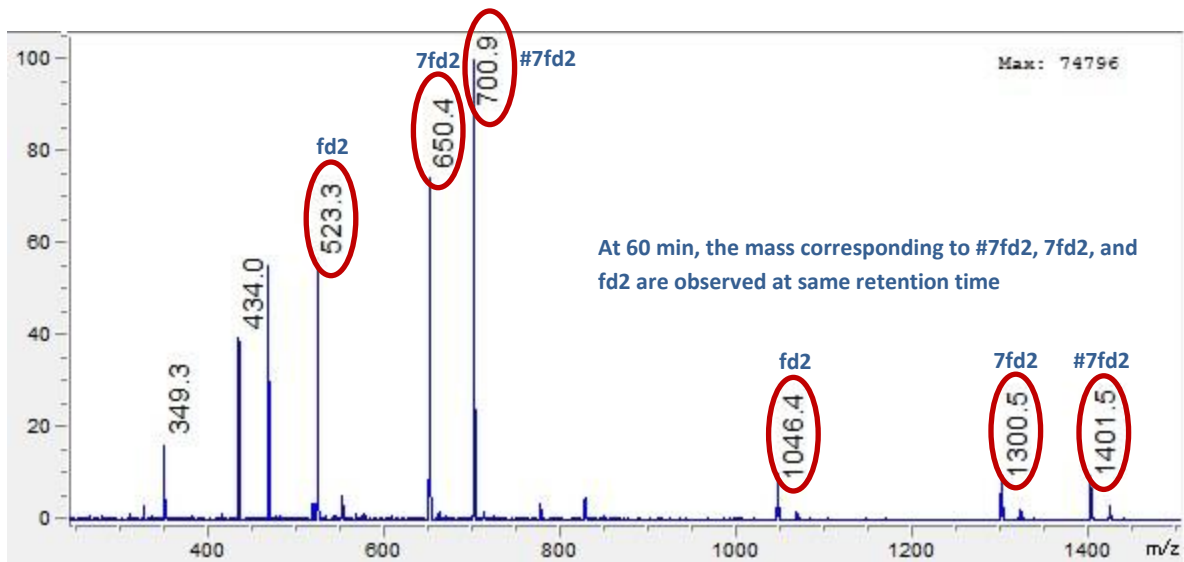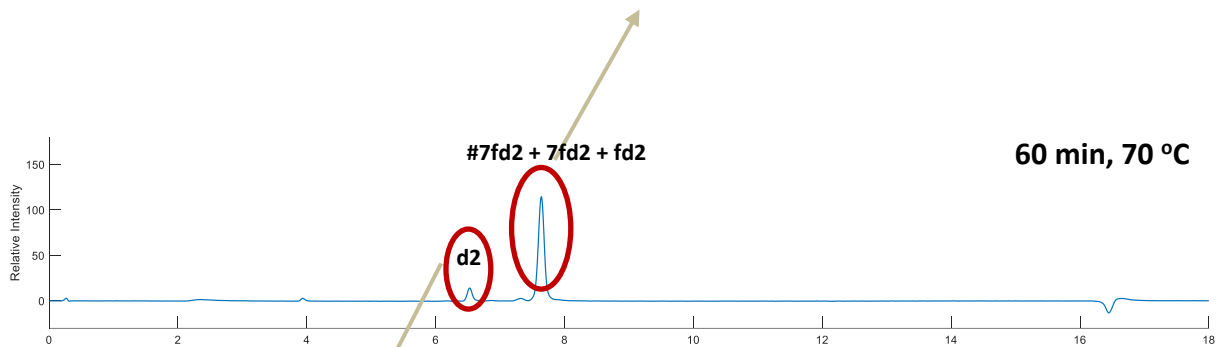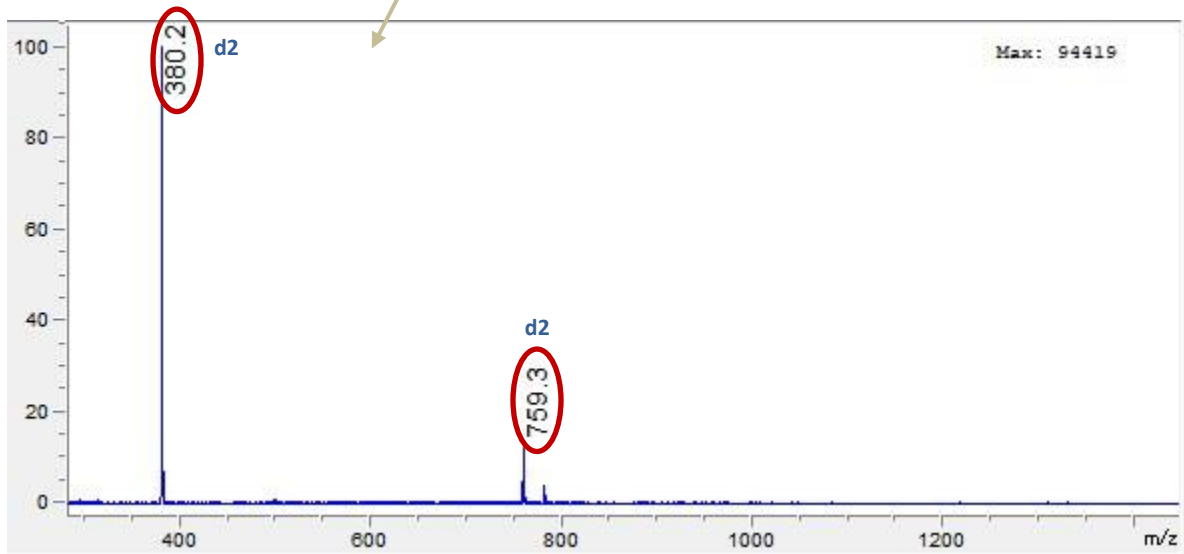

At 120 min, there are three peaks in the LC trace, and the corresponding MS for these peaks are shown below:

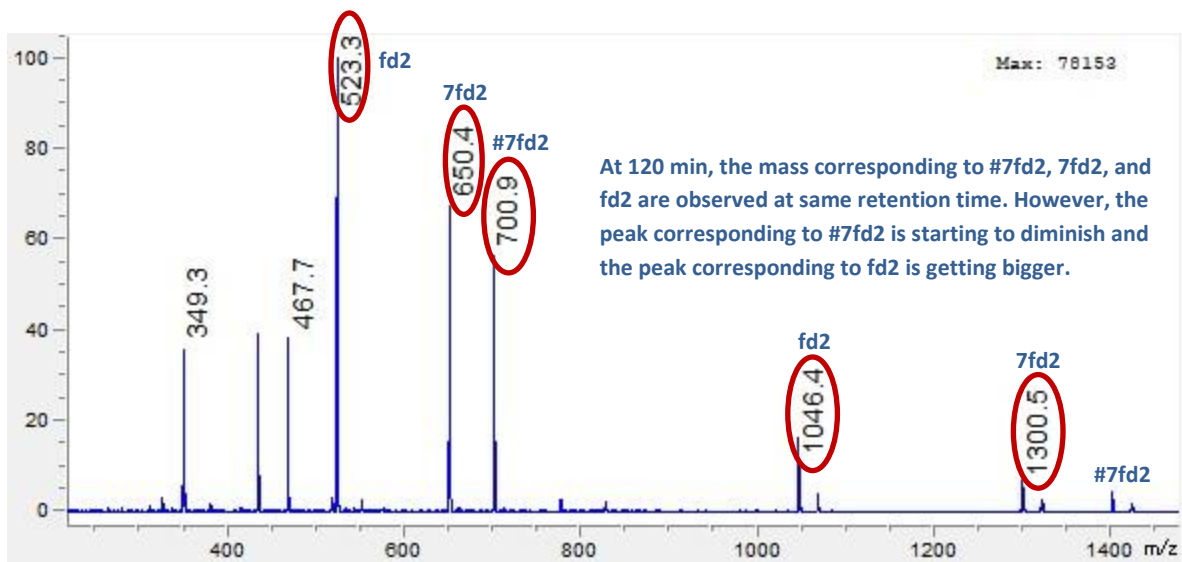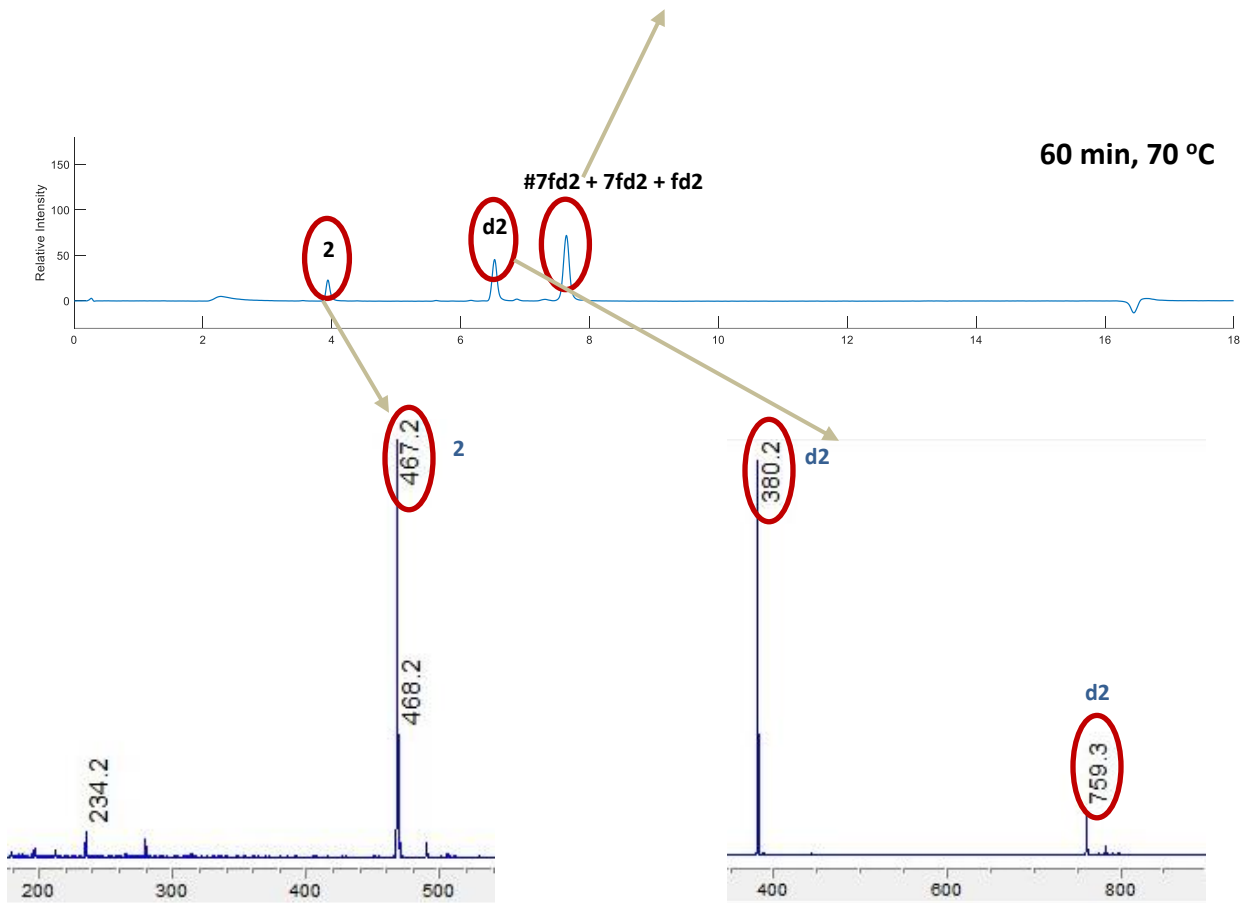

As we keep observing the LC trace and the corresponding MS peaks for the 180 and 240 minutes, we can confidently say what peaks are overlapping and what is the order of their appearance and disappearance. From this observation, the accurate sequence of the given oligomer can be determined.

III(d). The oligomers and corresponding Chinese characters.

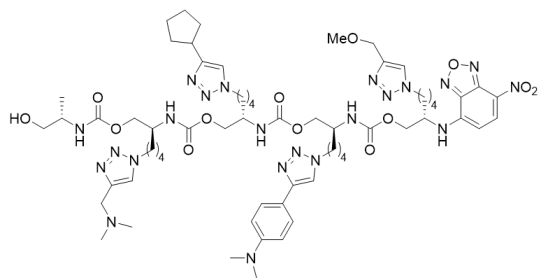

6027  
性

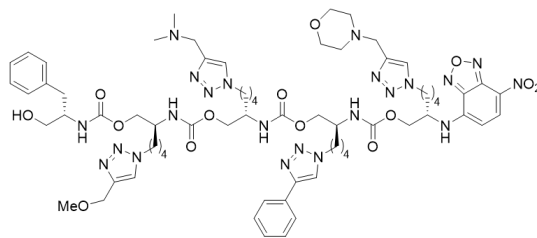

76f8  
相

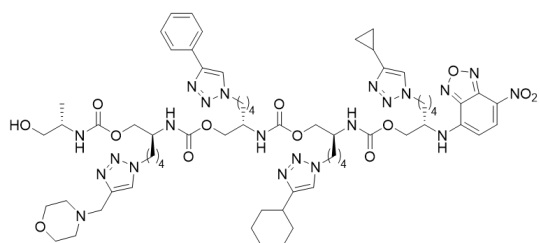

8fd1  
近

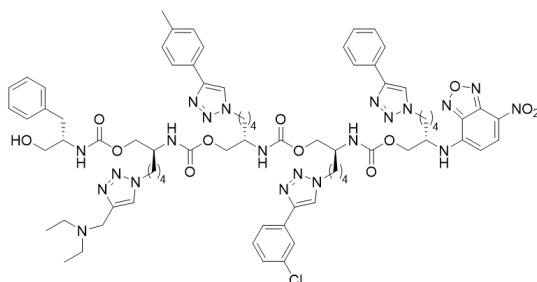

4e5f  
也

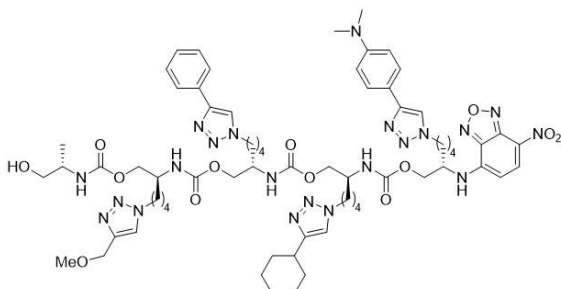

7fd2  
習

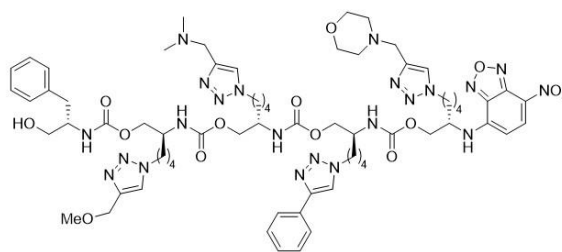

76f8  
相

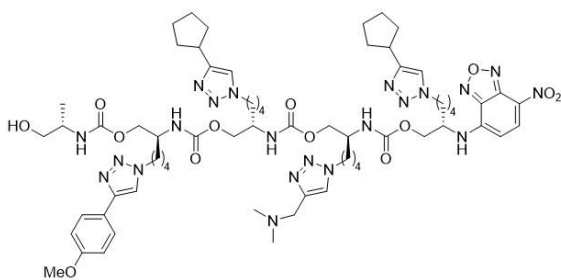

9060  
遠

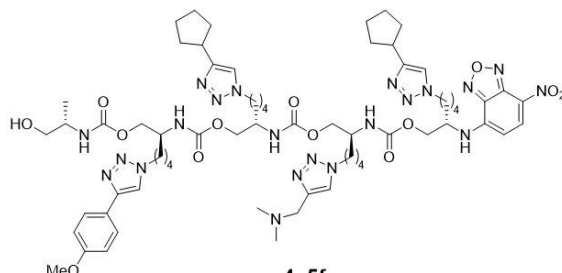

4e5f  
也

(1) Unicode encoding

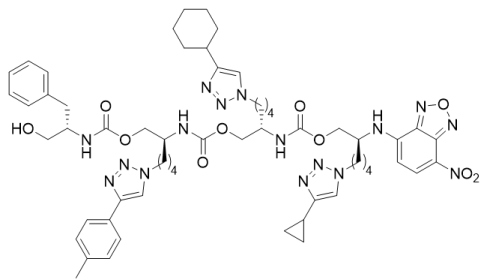

**UMC**  
性

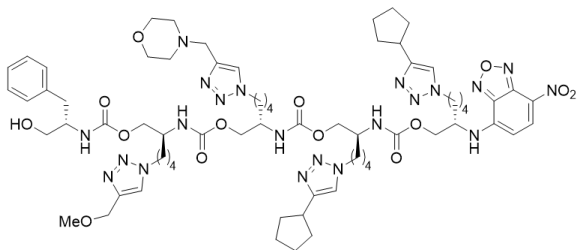

**FLVW**  
相

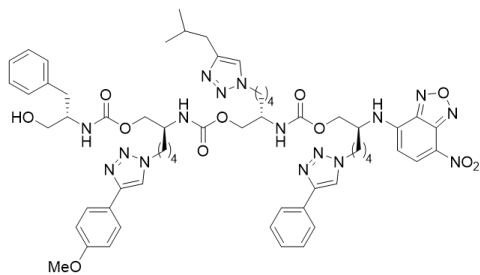

**PDW**  
近

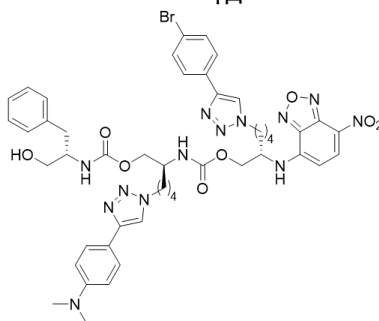

**YI**  
也

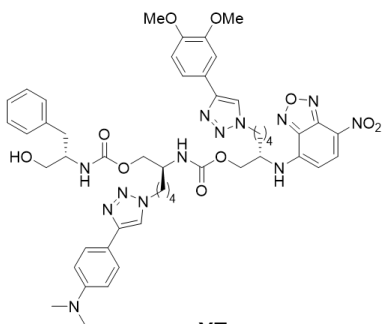

**YT**  
习

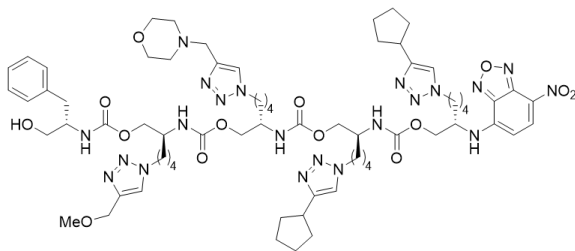

**FLVW**  
相

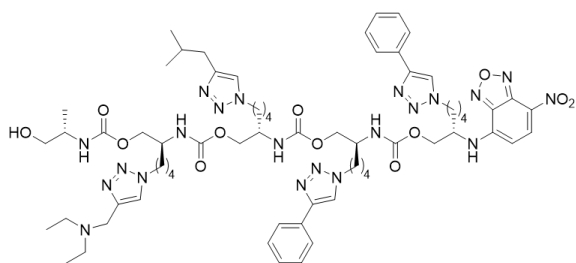

**BDRW**  
远

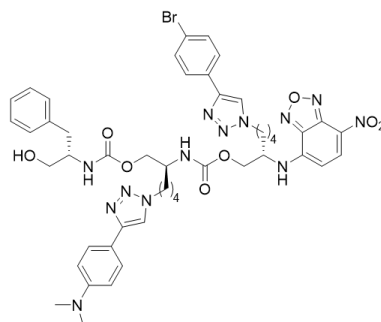

**YI**  
也

(2) Zhengma encoding

III(e). The zoomed in mass spectra of Oligomer Z5 (\*flvv) and Z6 (\*4e5f).

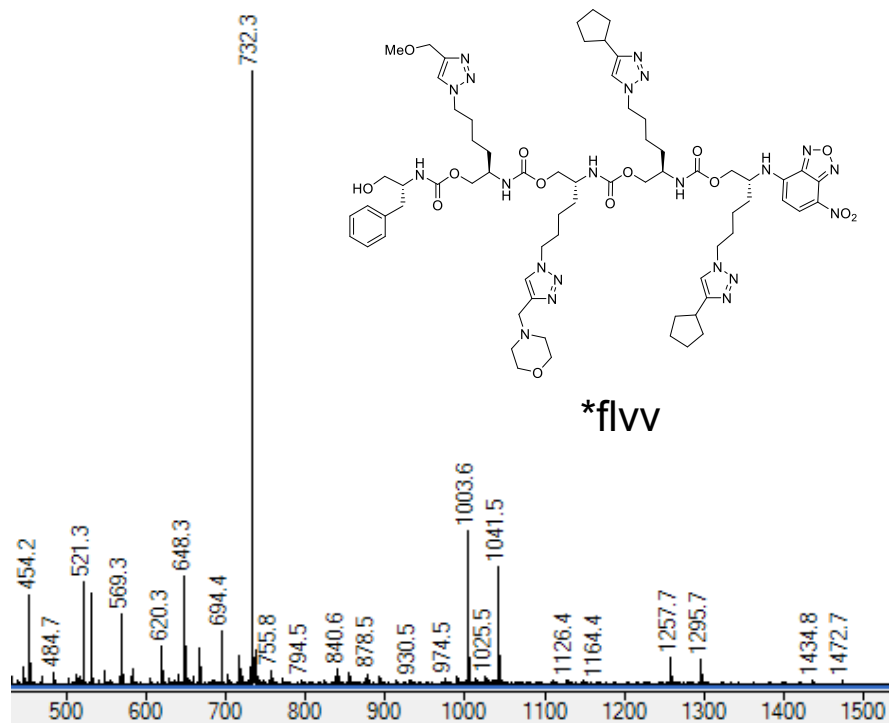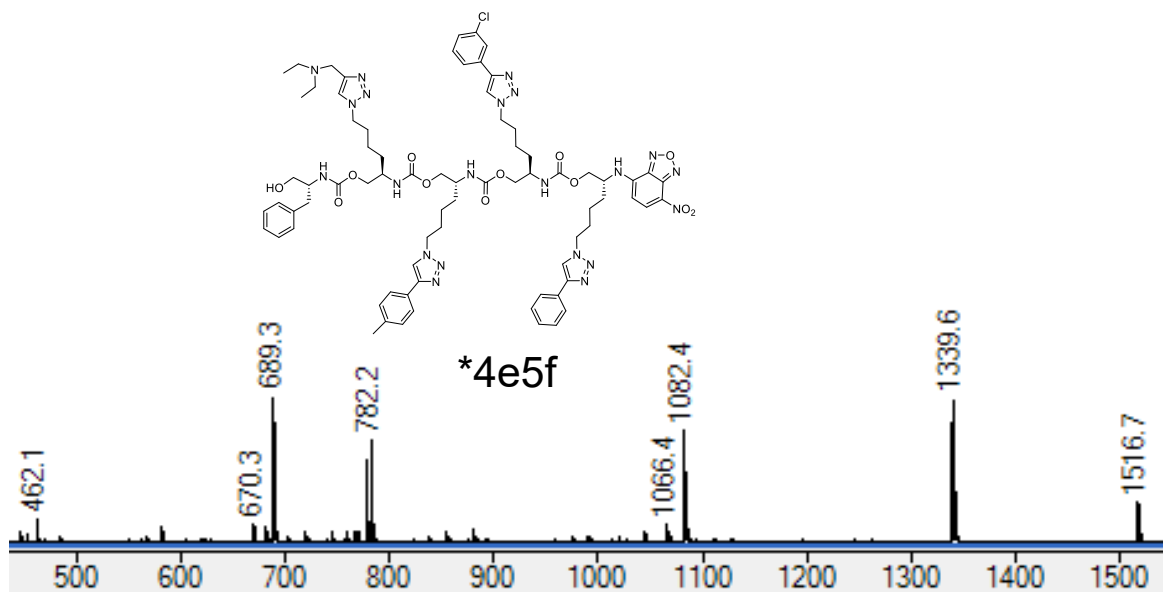



## IV. User manual for Python scripts

To use this program, download the zip file, which can be located by clicking on “Code” on the GitHub website.

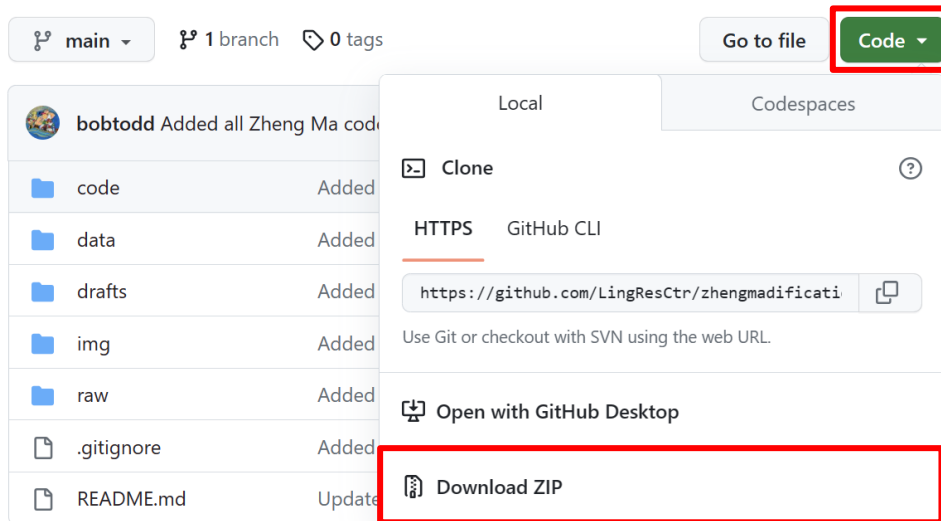

- To convert from Chinese characters to Zhengma codes

1. Go to the “code” folder.

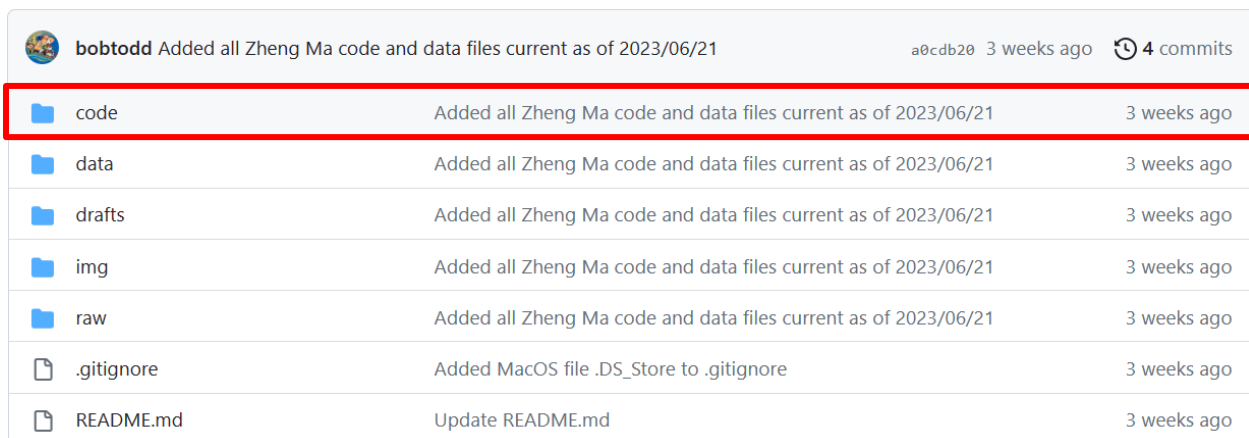

2. Open the “4\_converter.ipynb” file.

| Name               | Last commit message                                             | Last commit date |
|--------------------|-----------------------------------------------------------------|------------------|
| ..                 |                                                                 |                  |
| 1_background.ipynb | Added all Zheng Ma code and data files current as of 2023/06/21 | 3 weeks ago      |
| 2_data.ipynb       | Added all Zheng Ma code and data files current as of 2023/06/21 | 3 weeks ago      |
| 3_tests.ipynb      | Added all Zheng Ma code and data files current as of 2023/06/21 | 3 weeks ago      |
| 4_converter.ipynb  | Added all Zheng Ma code and data files current as of 2023/06/21 | 3 weeks ago      |
| zm_helpers.py      | Added all Zheng Ma code and data files current as of 2023/06/21 | 3 weeks ago      |

### 3. Load and run the codes 1-4 shown below.

```
In [1]: # If running in Google Colab
#from google.colab import drive
#drive.mount('/content/gdrive')
#
#path_prefix = "/content/gdrive/My Drive/CoLab Notebooks/zhengma/raw/"
#data_prefix = '/content/gdrive/My Drive/CoLab Notebooks/zhengma/data/'
```

```
In [2]: # If running on local system
path_prefix = "../raw/"
data_prefix = '../data/'
```

```
In [3]: import pickle

# Load pickle
with open(data_prefix + 'df_zm_merged.pkl', 'rb') as pickle_file:
    df_zm_merged = pickle.load(pickle_file)
```

```
In [4]: def characters_to_codes_simplistic(cjk_string, zm_dataframe, db_column='RIME Characters', zm_column='ZM Codes'):
# Input:
# string of CJK characters
# database of Zheng Ma codes as a pandas DataFrame
# name of column to check for characters
# name of column containing Zheng Ma codes
# Output:
# list (dictionary?) of Zheng Ma codes
# - In case of multiple code correspondences, choose the longest

characters = cjk_string.strip().replace(' ', '')

codes = []

for character in characters:
# Find any rows in the desired column that have the desired character
# Take the ZM codes in those rows as a list
possible_codes = zm_dataframe[z_m_dataframe[db_column] == character][zm_column].tolist()

# Choose the **longest code** in that list of ZM codes
max_code = max(possible_codes, key=len) if possible_codes else None
# There could be several, so order alphabetically and pick the first
desired_codes = [c for c in possible_codes if len(c) == len(max_code)] if max_code else None
desired_code = sorted(desired_codes)[0] if desired_codes else 'N/A: no match'
codes.append([character, desired_code])

return codes
```

### 4. In code line 5, enter the Chinese characters to be encoded, encased in quotation marks as shown in the red box. The example below reads “Zhengma Method” in Chinese.

```
In [5]: new_test_string1 = '郑码输入法'
```

5. Run code 6 to obtain the Zhengma codes that correlate to the Chinese characters.

```
In [6]: new_test_codes_output1 = characters_to_codes_simplistic(new_test_string1, df_zm_merged)
print(new_test_codes_output1)

[['郑', 'uagy'], ['码', 'gxvv'], ['输', 'heqk'], ['入', 'oda'], ['法', 'vbzs']]
```

## - To convert from Zhengma codes to Chinese characters

1. Go to the “code” folder.

|                                                                                                |                                                                 |                     |             |
|------------------------------------------------------------------------------------------------|-----------------------------------------------------------------|---------------------|-------------|
|  bobtodd      | Added all Zheng Ma code and data files current as of 2023/06/21 | a0cdb20 3 weeks ago | 🕒 4 commits |
|  code         | Added all Zheng Ma code and data files current as of 2023/06/21 |                     | 3 weeks ago |
|  data         | Added all Zheng Ma code and data files current as of 2023/06/21 |                     | 3 weeks ago |
|  drafts       | Added all Zheng Ma code and data files current as of 2023/06/21 |                     | 3 weeks ago |
|  img          | Added all Zheng Ma code and data files current as of 2023/06/21 |                     | 3 weeks ago |
|  raw          | Added all Zheng Ma code and data files current as of 2023/06/21 |                     | 3 weeks ago |
|  .gitignore | Added MacOS file .DS_Store to .gitignore                        |                     | 3 weeks ago |
|  README.md  | Update README.md                                                |                     | 3 weeks ago |

2. Open the “4\_converter.ipynb” file.

| Name                                                                                                   | Last commit message                                             | Last commit date |
|--------------------------------------------------------------------------------------------------------|-----------------------------------------------------------------|------------------|
| ..                                                                                                     |                                                                 |                  |
|  1_background.ipynb | Added all Zheng Ma code and data files current as of 2023/06/21 | 3 weeks ago      |
|  2_data.ipynb       | Added all Zheng Ma code and data files current as of 2023/06/21 | 3 weeks ago      |
|  3_tests.ipynb      | Added all Zheng Ma code and data files current as of 2023/06/21 | 3 weeks ago      |
|  4_converter.ipynb  | Added all Zheng Ma code and data files current as of 2023/06/21 | 3 weeks ago      |
|  zm_helpers.py      | Added all Zheng Ma code and data files current as of 2023/06/21 | 3 weeks ago      |

3. Load and run the codes 1-3 and 8 shown below.

```
In [1]: # If running in Google Colab
#from google.colab import drive
#drive.mount('/content/gdrive')
#
#path_prefix = "/content/gdrive/My Drive/Colab Notebooks/zhengma/raw/"
#data_prefix = '/content/gdrive/My Drive/Colab Notebooks/zhengma/data/'
```

```
In [2]: # If running on local system
path_prefix = "../raw/"
data_prefix = '../data/'
```

```
In [3]: import pickle

# Load pickle
with open(data_prefix + 'df_zm_merged.pkl', 'rb') as pickle_file:
    df_zm_merged = pickle.load(pickle_file)
```

```
In [8]: def codes_to_characters_simplistic(code_list, zm_dataframe, db_column='RIME Characters', zm_column='ZM Codes'):
# Input:
# List of ZM codes
# database of Zheng Ma codes as a pandas DataFrame
# name of column to check for characters
# name of column containing Zheng Ma codes
# Output:
# string of CJK characters
# - In case of multiple character correspondences for a code, choose...

cjk_string = ''

for code in code_list:
# Make sure the code is a valid ZM code:
# - fewer than 5 letters
# - no spaces
if ' ' not in code:
if len(code) < 5:
# Get the characters for that code
possible_characters = zm_dataframe[z_m_dataframe[z_m_column] == code][db_column].tolist()
# Remove any empty strings
viable_characters = [x for x in possible_characters if (len(x) > 0)]
# Add the smallest string (hopefully 1 character)
# ... watch out: there might be more than one minimum...
# ... what does min() do? return the first it finds in the list?
cjk_string += min(viable_characters, key=len)
else:
print('Code too long: {}'.format(code))
else:
print('Code should not contain spaces: {}'.format(code))

return cjk_string
```

4. In code line 10, enter the Zhengma codes to be decoded back to Chinese characters as shown in the red box below. Each Zhengma code should be encased in quotation marks as well as separated from the other Zhengma codes by commas. Then, all Zhengma codes should be encased in a pair of brackets. Running this code will return the Chinese characters correlating to the Zhengma codes.

```
In [10]: new_test_string_output1 = codes_to_characters_simplistic(['uagy', 'gxvv', 'heqk', 'oda', 'vbzs'], df_zm_merged)
print(new_test_string_output1)
```

郑码输入法
